# Supplementary material for: Reactions of dizincocene with sterically demanding bis(iminodi(phenyl)phosphorano)methanes
Source: Royal Society of Chemistry journal article supplement (doi:10.1039/c0cc02859b), 2010-01-01
Supplement: c0cc02859b.pdf [file c0cc02859b.pdf]

# Supporting Informations

## Reactions of Dizincocene with sterically demanding Bis(iminodi(phenyl)phosphorano)methanes

*Stephan Schulz,\* Daniella Schuchmann, Sebastian Gondzik, Lukasz Dobrzycki,  
Roland Boese and Sjoerd Harder*

## Experimental Section

Manipulations were performed in a glove box under an Ar-atmosphere or with standard Schlenk techniques. Dry solvents were obtained from a solvent purification system (MBraun) and degassed prior to use.  $\text{H}_2\text{C}(\text{Ph}_2\text{P}=\text{N-Dipp})_2$  and  $\text{H}_2\text{C}(\text{Ph}_2\text{P}=\text{N-TMS})_2$  were prepared according to the literature methods.[1,2] A Bruker Avance 500 spectrometer was used for NMR spectroscopy.  $^1\text{H}$  and  $^{13}\text{C}\{^1\text{H}\}$  NMR spectra were referenced to internal  $\text{C}_6\text{D}_5\text{H}$  ( $^1\text{H}$ :  $\delta = 7.154$ ;  $^{13}\text{C}$ :  $\delta = 128.0$ ),  $^{31}\text{P}\{^1\text{H}\}$  spectra to external  $\text{H}_3\text{PO}_4$  ( $\delta(^{31}\text{P}) = 0$ ). IR spectra were recorded on a Alpha-T FT-IR spectrometer with a single reflection ATR sampling module. Melting points were measured in sealed capillaries and were not corrected.

### ***[HC(Ph<sub>2</sub>P=N-Ph)<sub>2</sub>]<sub>2</sub>Zn<sub>2</sub> (1)***

A solution of 0.28 g (0.5 mmol)  $\text{H}_2\text{C}(\text{Ph}_2\text{P}=\text{N-Ph})_2$  in 25 mL of toluene was added at 0 °C to a solution of 0.10 g (0.25 mmol)  $\text{Cp}^*\text{Zn}_2$  in 10 mL of pentane. The solution was stirred for 4 h at 0 °C, yielding a brown precipitate that was isolated by filtration and dried in vacuum. The brown solid was dissolved in  $\text{CH}_2\text{Cl}_2$ /toluene, concentrated and stored at room temperature, yielding colorless crystals after 12 h.

Yield 0.26 g (82.5 %). Anal. Found (calcd) for  $\text{C}_{74}\text{H}_{62}\text{N}_4\text{P}_4\text{Zn}_2$  (1261.97 g/mol): H, 4.87 (4.95); C, 70.29 (70.43); N, 4.37 (4.44). M.p. 135 °C (decomp.). – IR:  $\nu = 3052, 3008, 2961, 2915, 2854, 1588, 1482, 1434, 1256, 1178, 1101, 1028, 1004, 972, 795, 740, 728, 689, 624, 609, 543, 517, 494, 464 \text{ cm}^{-1}$ . –  $^1\text{H}$  NMR (300 MHz, THF- $d_8$ , 298 K):  $\delta = 6.45 - 7.60$  (m, 30H,  $\text{C}_{\text{Ar}}\text{H}$ ). –  $^{13}\text{C}$  NMR (300 MHz, THF- $d_8$ , 298 K):  $\delta = 122.9$  (*p-Ph<sub>P</sub>*), 126.1 (*p-Ph<sub>N</sub>*), 128.7 (*m-Ph<sub>P</sub>*), 128.9 (*m-Ph<sub>N</sub>*), 129.6 (*o-Ph<sub>P</sub>*), 133.5 (*o-Ph<sub>N</sub>*), 133.7 (*ipso-Ph<sub>P</sub>*), 150.9 (*ipso-Ph<sub>N</sub>*). –  $^{31}\text{P}$ -NMR (300 MHz, THF- $d_8$ , 298 K):  $\delta = 22.3$ .

### ***[HC(Ph<sub>2</sub>P=N-TMS)<sub>2</sub>]<sub>2</sub>ZnZnCp\* (2)***

A solution of 0.15 g (0.25 mmol)  $\text{H}_2\text{C}(\text{Ph}_2\text{P}=\text{N-TMS})_2$  in 15 mL of *n*-pentane was added at -20 °C to a solution of 0.1 g (0.25 mmol)  $\text{Cp}^*\text{Zn}_2$  in 15 mL of *n*-pentane, slowly warmed to ambient temperature and stirred for additional 2 h. The solvent was removed in vacuum yielding a white oily solid, which was suspended in *n*-pentane and was stored at -30 °C for 24 h, yielding **2** as colorless solid, which was isolated by filtration and dried in vacuum.

Yield 0.1 g (55.6 %). Anal. Found (calcd) for  $\text{C}_{41}\text{H}_{54}\text{N}_2\text{P}_2\text{Zn}_2$  (767.58 g/mol): H, 7.03 (7.09); C, 64.07 (64.16); N, 3.26 (3.65). M.p. 110 °C (decomp.) – IR:  $\nu = 3057, 2961, 2906, 1590,$

1434, 1258, 1067, 1015, 795, 692, 612, 545, 463, 393  $\text{cm}^{-1}$ . –  $^1\text{H}$ -NMR (300 MHz,  $\text{C}_6\text{D}_6$ , 298 K):  $\delta$  = 0.12 (s, 18H,  $\text{SiMe}_3$ ), 2.35 (s, 15H,  $\text{Cp}^*$ ), 3.28 (m, 1H,  $\text{PCHP}$ ), 7.01 (m, 12H,  $\text{C}_{\text{Ar}}\text{H}$ ), 7.56 (m, 8H,  $\text{C}_{\text{Ar}}\text{H}$ ). –  $^{13}\text{C}$ -NMR (125 MHz,  $\text{C}_6\text{D}_6$ , 298 K):  $\delta$  = 3.6 ( $\text{SiMe}_3$ ), 10.6 ( $\text{C}_5(\text{CH}_3)_5$ ), 26.3 ( $\text{PCHP}$ ), 108.3 ( $\text{C}_5(\text{CH}_3)_5$ ), 130.0 ( $p$ -Ar), 131.4 ( $m$ -Ar), 131.5 ( $o$ -Ar), 131.6 ( $ipso$ -Ar). –  $^{31}\text{P}$  NMR (500 MHz,  $\text{C}_6\text{D}_6$ , 298 K):  $\delta$  = 24.4.

### **[HC(Ph<sub>2</sub>P=N-Dipp)<sub>2</sub>]ZnZnCp\* (3)**

A solution of 0.18 g (0.25 mmol)  $\text{H}_2\text{C}(\text{Ph}_2\text{P}=\text{N-Dipp})_2$  in 10 mL of cyclohexane was added at 0 °C to a solution of 0.1 g (0.25 mmol)  $\text{Cp}^*_2\text{Zn}_2$  in 10 mL of cyclohexane, warmed to ambient temperature and stirred for additional 2 h. The resulting precipitate was isolated by filtration and dried in vacuum, yielding **3** as slightly yellow crystalline solid.

Yield 0.18 g (72.3 %). Anal. Found (calcd) for  $\text{C}_{59}\text{H}_{70}\text{N}_2\text{P}_2\text{Zn}_2$  (999.91 g/mol): H, 7.02 (7.06); C, 70.76 (70.87); N, 2.74 (2.80). M.p. 150 °C (decomp.). – IR:  $\nu$  = 3054, 2961, 2923, 2850, 1588, 1431, 1258, 1198, 1096, 1012, 981, 862, 786, 743, 692, 598, 529, 508, 385  $\text{cm}^{-1}$ . –  $^1\text{H}$  NMR (500 MHz,  $\text{C}_6\text{D}_6$ , 298 K):  $\delta$  = 0.81 (d, 12H,  $\text{CHCH}_3$ ), 1.58 (d, 12H,  $\text{CHCH}_3$ ), 2.07 (s, 15H,  $\text{Cp}^*$ ), 3.71 (m, 1H,  $\text{PCHP}$ ), 3.89 (m, 4H,  $\text{CHCH}_3$ ), 7.11 (m, 12H,  $\text{C}_{\text{Ar}}\text{H}$ ), 7.16 (m, 6H,  $\text{C}_{\text{Ar}}\text{H}$ ), 7.71 (m, 8H,  $\text{C}_{\text{Ar}}\text{H}$ ). –  $^{13}\text{C}$  NMR (500 MHz,  $\text{C}_6\text{D}_6$ , 298 K):  $\delta$  = 10.5 ( $\text{C}_5(\text{CH}_3)_5$ ), 22.7 ( $\text{CH}(\text{CH}_3)_2$ ), 26.5 ( $\text{CH}(\text{CH}_3)_2$ ), 28.6 ( $\text{PCHP}$ ), 108.1 ( $\text{C}_5(\text{CH}_3)_5$ ), 123.8 ( $p$ -Ar), 124.0 ( $m$ -Ar), 130.4 ( $p$ - $m$ -Ph), 132.8 ( $o$ -Ph), 136.9 ( $ipso$ -Ph), 143.6 ( $o$ -Ar), 146.2 ( $ipso$ -Ar). –  $^{31}\text{P}$  NMR (500 MHz,  $\text{C}_6\text{D}_6$ , 298 K):  $\delta$  = 27.4.

### **[HC(Ph<sub>2</sub>P=N-Ph)<sub>2</sub>]ZnZnCp\* (4)**

A solution of 0.14 g (0.25 mmol)  $\text{H}_2\text{C}(\text{Ph}_2\text{P}=\text{N-Ph})_2$  in 15 mL of toluene was added at 0 °C to a solution of 0.10 g (0.25 mmol)  $\text{Cp}^*_2\text{Zn}_2$  in 15 mL of pentane. The solution was stirred for 6 h at 0 °C. The resulting suspension was concentrated and the resulting brown precipitate was isolated by filtration and dried in vacuum

Yield 0.13 g (62.6 %). Anal. Found (calcd) for  $\text{C}_{47}\text{H}_{46}\text{N}_2\text{P}_2\text{Zn}_2$  (831.59 g/mol): H, 5.52 (5.57); C, 67.82 (67.89); N, 3.34 (3.37). M.p. 105 °C (decomp.). – IR:  $\nu$  = 3051, 3010, 2959, 2914, 2850, 1592, 1480, 1430, 1257, 1184, 1100, 1022, 1006, 978, 799, 734, 727, 687, 606, 539, 518, 490  $\text{cm}^{-1}$ . –  $^1\text{H}$  NMR (300 MHz,  $\text{THF-d}_8$ , 298 K):  $\delta$  = 1.91 (s, 15H,  $\text{C}_5(\text{CH}_3)_5$ ), 6.56 – 7.44 (m, 30H,  $\text{C}_{\text{Ar}}\text{H}$ ). –  $^{13}\text{C}$  NMR (300 MHz,  $\text{THF-d}_8$ , 298 K):  $\delta$  = 10.1 ( $\text{C}_5(\text{CH}_3)_5$ ), 108.4 ( $\text{C}_5(\text{CH}_3)_5$ ), 123.7 ( $p$ - $\text{Ph}_P$ ), 127.1 ( $p$ - $\text{Ph}_N$ ), 129.3 ( $m$ - $\text{Ph}_P$ ), 129.7 ( $m$ - $\text{Ph}_N$ ), 130.1 ( $o$ - $\text{Ph}_P$ ), 134.3 ( $o$ - $\text{Ph}_N$ ), 135.9 ( $ipso$ - $\text{Ph}_P$ ), 139.9 ( $ipso$ - $\text{Ph}_N$ ). –  $^{31}\text{P}$  NMR (300 MHz,  $\text{CD}_2\text{Cl}_2$ , 298 K):  $\delta$  = 21.9.

### *Single Crystal Structure Determination of 1 and 3*

Data were collected on a Bruker AXS SMART APEX CCD diffractometer (MoK $\alpha$  radiation,  $\lambda = 0.71073$  Å). The structure was solved by Direct Methods SHELXL-97<sup>[3]</sup> and refined by full-matrix least-squares on  $F^2$ . A semi-empirical absorption correction was applied. All non-hydrogen atoms were refined anisotropically and hydrogen atoms by a riding model (SHELXL-97, Program for Crystal Structure Refinement)<sup>[4]</sup>.

CCDC 785388 (**1**) and 780366 (**3**) contain the supplementary crystallographic data for this paper. These data can be obtained free of charge from The Cambridge Crystallographic Data Centre *via* [www.ccdc.cam.ac.uk/data\\_request/cif](http://www.ccdc.cam.ac.uk/data_request/cif).

### **References**

- [1] S. Al-Benna, M.J. Sarsfield, M. Thornton-Pett, D.L. Ormsby, P.J. Maddox, P. Bres, M. Bochmann, *J. Chem.Soc., Dalton Trans.* **2000**, 4247-4257.
- [2] R. Appel, I. Ruppert, *Z. anorg. Allg. Chem.* **1974**, 406, 131-144.
- [3] G. M. Sheldrick, *Acta Crystallogr.* 1990, **A46**, 467.
- [4] G. M. Sheldrick, SHELXL-97, Program for the Refinement of Crystal Structures University of Göttingen, Göttingen (Germany) **1997**.

Table 1. Crystal data and structure refinement for **1**.

|                                   |                                                                               |                          |
|-----------------------------------|-------------------------------------------------------------------------------|--------------------------|
| Identification code               | sg087_2                                                                       |                          |
| Empirical formula                 | C <sub>95</sub> H <sub>86</sub> N <sub>4</sub> P <sub>4</sub> Zn <sub>2</sub> |                          |
| Formula weight                    | 1538.30                                                                       |                          |
| Temperature                       | 101(2) K                                                                      |                          |
| Wavelength                        | 0.71073 Å                                                                     |                          |
| Crystal system, space group       | Monoclinic, C2/c                                                              |                          |
| Unit cell dimensions              | a = 30.7145(15) Å                                                             | alpha = 90 deg.          |
|                                   | b = 9.7542(5) Å                                                               | beta = 119.1590(10) deg. |
|                                   | c = 29.716(2) Å                                                               | gamma = 90 deg.          |
| Volume                            | 7774.6(8) Å <sup>3</sup>                                                      |                          |
| Z, Calculated density             | 4, 1.314 Mg/m <sup>3</sup>                                                    |                          |
| Absorption coefficient            | 0.750 mm <sup>-1</sup>                                                        |                          |
| F(000)                            | 3216                                                                          |                          |
| Crystal size                      | 0.23 x 0.11 x 0.10 mm                                                         |                          |
| Theta range for data collection   | 1.52 to 27.50 deg.                                                            |                          |
| Limiting indices                  | -35<=h<=39, -12<=k<=12, -38<=l<=38                                            |                          |
| Reflections collected / unique    | 49120 / 8939 [R(int) = 0.0480]                                                |                          |
| Completeness to theta =           | 27.50 100.0 %                                                                 |                          |
| Absorption correction             | Semi-empirical from equivalents                                               |                          |
| Max. and min. transmission        | 0.929 and 0.725                                                               |                          |
| Refinement method                 | Full-matrix least-squares on F <sup>2</sup>                                   |                          |
| Data / restraints / parameters    | 8939 / 118 / 680                                                              |                          |
| Goodness-of-fit on F <sup>2</sup> | 1.038                                                                         |                          |
| Final R indices [I>2sigma(I)]     | R1 = 0.0354, wR2 = 0.0824                                                     |                          |
| R indices (all data)              | R1 = 0.0536, wR2 = 0.0913                                                     |                          |
| Largest diff. peak and hole       | 0.578 and -0.295 e.Å <sup>-3</sup>                                            |                          |

Table 2. Atomic coordinates ( $\times 10^4$ ) and equivalent isotropic displacement parameters ( $\text{\AA}^2 \times 10^3$ ) for **1**.  $U(\text{eq})$  is defined as one third of the trace of the orthogonalized  $U_{ij}$  tensor.

|        | <b>x</b> | <b>y</b> | <b>z</b> | <b>U(eq)</b> |
|--------|----------|----------|----------|--------------|
| Zn(1)  | 174(1)   | 1354(1)  | 2225(1)  | 23(1)        |
| P(1)   | 1176(1)  | 1924(1)  | 2417(1)  | 19(1)        |
| P(2)   | 268(1)   | 2796(1)  | 1427(1)  | 21(1)        |
| N(1)   | -112(1)  | 1700(2)  | 1454(1)  | 26(1)        |
| N(2)   | 862(1)   | 564(2)   | 2386(1)  | 22(1)        |
| C(1)   | 725(1)   | 3117(2)  | 2055(1)  | 22(1)        |
| C(2)   | -598(4)  | 1152(13) | 1092(4)  | 17(2)        |
| C(3)   | -836(4)  | 1603(9)  | 580(5)   | 24(2)        |
| C(4)   | -1308(4) | 1122(8)  | 233(3)   | 30(2)        |
| C(5)   | -1551(4) | 199(9)   | 385(4)   | 31(2)        |
| C(6)   | -1320(4) | -262(10) | 885(5)   | 27(2)        |
| C(7)   | -844(5)  | 192(12)  | 1241(4)  | 19(2)        |
| C(2A)  | -568(4)  | 1395(13) | 1030(5)  | 20(2)        |
| C(3A)  | -795(4)  | 1937(9)  | 536(4)   | 19(2)        |
| C(4A)  | -1281(4) | 1543(8)  | 173(3)   | 24(2)        |
| C(5A)  | -1542(4) | 612(8)   | 300(4)   | 27(2)        |
| C(6A)  | -1316(5) | 62(10)   | 794(5)   | 29(2)        |
| C(7A)  | -840(5)  | 452(12)  | 1148(4)  | 21(2)        |
| C(8)   | 1040(1)  | -697(2)  | 2630(1)  | 27(1)        |
| C(9)   | 698(1)   | -1775(2) | 2498(1)  | 38(1)        |
| C(10)  | 850(1)   | -3054(2) | 2724(1)  | 54(1)        |
| C(11)  | 1339(1)  | -3298(3) | 3081(1)  | 58(1)        |
| C(12)  | 1676(1)  | -2244(3) | 3218(1)  | 54(1)        |
| C(13)  | 1533(1)  | -949(2)  | 3000(1)  | 39(1)        |
| C(14)  | 1528(1)  | 2618(2)  | 3066(1)  | 24(1)        |
| C(15)  | 1285(4)  | 2833(10) | 3340(4)  | 29(3)        |
| C(16)  | 1530(5)  | 3316(14) | 3850(4)  | 30(4)        |
| C(17)  | 2034(5)  | 3573(11) | 4080(4)  | 34(2)        |
| C(18)  | 2291(3)  | 3371(7)  | 3812(4)  | 34(2)        |
| C(19)  | 2038(4)  | 2907(9)  | 3304(4)  | 33(2)        |
| C(14A) | 1528(1)  | 2618(2)  | 3066(1)  | 24(1)        |
| C(15A) | 1239(4)  | 3010(11) | 3305(4)  | 18(2)        |
| C(16A) | 1476(5)  | 3337(15) | 3817(5)  | 35(4)        |
| C(17A) | 1991(5)  | 3294(12) | 4113(4)  | 46(3)        |
| C(18A) | 2272(3)  | 2934(10) | 3887(3)  | 65(3)        |
| C(19A) | 2047(4)  | 2571(10) | 3370(4)  | 47(3)        |
| C(20)  | 1626(1)  | 1561(2)  | 2204(1)  | 22(1)        |
| C(21)  | 1635(1)  | 284(2)   | 1998(1)  | 25(1)        |

|        |         |          |         |        |
|--------|---------|----------|---------|--------|
| C(22)  | 1964(1) | 18(2)    | 1816(1) | 29(1)  |
| C(23)  | 2292(1) | 1024(2)  | 1840(1) | 34(1)  |
| C(24)  | 2282(1) | 2310(2)  | 2035(1) | 37(1)  |
| C(25)  | 1947(1) | 2581(2)  | 2208(1) | 32(1)  |
| C(26)  | 527(1)  | 2172(2)  | 1033(1) | 24(1)  |
| C(27)  | 379(1)  | 919(2)   | 777(1)  | 31(1)  |
| C(28)  | 613(1)  | 416(2)   | 508(1)  | 37(1)  |
| C(29)  | 992(1)  | 1138(2)  | 501(1)  | 37(1)  |
| C(30)  | 1143(1) | 2377(2)  | 756(1)  | 36(1)  |
| C(31)  | 913(1)  | 2897(2)  | 1022(1) | 30(1)  |
| C(32)  | -81(3)  | 4317(9)  | 1141(4) | 18(2)  |
| C(33)  | -155(2) | 4804(7)  | 671(3)  | 22(1)  |
| C(34)  | -423(2) | 5997(7)  | 460(3)  | 37(2)  |
| C(35)  | -621(3) | 6721(7)  | 718(3)  | 48(2)  |
| C(36)  | -551(3) | 6246(9)  | 1186(3) | 42(2)  |
| C(37)  | -286(4) | 5049(10) | 1398(4) | 25(2)  |
| C(32A) | 25(3)   | 4551(8)  | 1174(4) | 16(2)  |
| C(33A) | -17(2)  | 5094(7)  | 721(3)  | 23(1)  |
| C(34A) | -243(2) | 6351(6)  | 545(3)  | 31(1)  |
| C(35A) | -424(2) | 7075(6)  | 817(3)  | 30(1)  |
| C(36A) | -387(3) | 6540(9)  | 1262(3) | 33(2)  |
| C(37A) | -165(4) | 5269(11) | 1439(4) | 28(2)  |
| C(1S)  | 1031(1) | 6906(4)  | 1311(2) | 50(2)  |
| C(2S)  | 1488(2) | 6547(6)  | 1727(1) | 48(4)  |
| C(3S)  | 1855(1) | 5952(6)  | 1639(1) | 42(2)  |
| C(4S)  | 1764(1) | 5705(4)  | 1142(1) | 40(1)  |
| C(5S)  | 1303(1) | 6053(4)  | 729(1)  | 43(1)  |
| C(6S)  | 943(1)  | 6652(4)  | 813(1)  | 43(1)  |
| C(7SA) | 630(2)  | 7570(6)  | 1358(2) | 44(2)  |
| C(7SB) | 2147(2) | 5135(6)  | 1040(2) | 49(2)  |
| C(1X)  | 1562(2) | 6007(5)  | 859(2)  | 56(3)  |
| C(2X)  | 1940(2) | 5602(7)  | 1335(3) | 71(4)  |
| C(3X)  | 1901(3) | 5833(10) | 1775(2) | 64(4)  |
| C(4X)  | 1482(3) | 6486(9)  | 1733(2) | 72(8)  |
| C(5X)  | 1098(2) | 6898(8)  | 1257(3) | 61(3)  |
| C(6X)  | 1146(2) | 6648(7)  | 819(2)  | 54(3)  |
| C(7XA) | 1618(3) | 5745(8)  | 418(3)  | 70(3)  |
| C(7XB) | 1440(5) | 6677(14) | 2184(3) | 76(10) |
| C(1T)  | 2881(3) | 7918(8)  | 5073(3) | 60(5)  |
| C(2T)  | 2740(3) | 7099(9)  | 4634(3) | 48(3)  |
| C(3T)  | 2284(3) | 6415(9)  | 4424(3) | 41(3)  |

|       |         |          |         |        |
|-------|---------|----------|---------|--------|
| C(4T) | 1979(3) | 6537(10) | 4643(3) | 40(6)  |
| C(5T) | 2120(3) | 7347(12) | 5074(4) | 59(3)  |
| C(6T) | 2576(3) | 8039(11) | 5292(3) | 47(5)  |
| C(7T) | 3359(3) | 8629(12) | 5292(4) | 52(3)  |
| C(1U) | 2822(3) | 8239(9)  | 5048(4) | 38(3)  |
| C(2U) | 2754(4) | 7949(11) | 5463(4) | 41(4)  |
| C(3U) | 2367(4) | 7095(12) | 5408(5) | 54(4)  |
| C(4U) | 2044(4) | 6534(11) | 4930(5) | 61(4)  |
| C(5U) | 2111(4) | 6820(11) | 4510(4) | 46(3)  |
| C(6U) | 2497(4) | 7672(10) | 4569(4) | 56(3)  |
| C(7U) | 3240(4) | 9162(11) | 5089(4) | 51(3)  |
| C(1V) | 2271(5) | 7172(16) | 4905(5) | 27(4)  |
| C(2V) | 2341(5) | 7027(16) | 4483(4) | 42(4)  |
| C(3V) | 2772(6) | 7534(17) | 4495(5) | 32(4)  |
| C(4V) | 3133(5) | 8187(17) | 4937(6) | 33(4)  |
| C(5V) | 3060(6) | 8340(20) | 5362(6) | 50(15) |
| C(6V) | 2632(7) | 7830(20) | 5347(5) | 29(8)  |
| C(7V) | 1809(6) | 6650(20) | 4903(9) | 44(7)  |

Table 3. Bond lengths [Å] and angles [deg] for **1**.

|               |            |             |           |
|---------------|------------|-------------|-----------|
| Zn(1)-N(1)    | 2.0417(16) | C(8)-C(9)   | 1.400(3)  |
| Zn(1)-N(2)    | 2.0746(16) | C(9)-C(10)  | 1.385(3)  |
| Zn(1)-Zn(1)#1 | 2.3490(5)  | C(9)-H(9)   | 0.9500    |
| Zn(1)-P(2)    | 2.8909(6)  | C(10)-C(11) | 1.373(4)  |
| Zn(1)-P(1)    | 2.8962(5)  | C(10)-H(10) | 0.9500    |
| P(1)-N(2)     | 1.6149(16) | C(11)-C(12) | 1.372(4)  |
| P(1)-C(1)     | 1.7249(19) | C(11)-H(11) | 0.9500    |
| P(1)-C(20)    | 1.816(2)   | C(12)-C(13) | 1.389(3)  |
| P(1)-C(14)    | 1.8219(19) | C(12)-H(12) | 0.9500    |
| P(2)-N(1)     | 1.6148(18) | C(13)-H(13) | 0.9500    |
| P(2)-C(1)     | 1.7321(19) | C(14)-C(15) | 1.363(11) |
| P(2)-C(32)    | 1.784(9)   | C(14)-C(19) | 1.396(11) |
| P(2)-C(26)    | 1.811(2)   | C(15)-C(16) | 1.403(11) |
| P(2)-C(32A)   | 1.872(8)   | C(15)-H(15) | 0.9500    |
| N(1)-C(2A)    | 1.385(12)  | C(16)-C(17) | 1.378(12) |
| N(1)-C(2)     | 1.451(10)  | C(16)-H(16) | 0.9500    |
| N(2)-C(8)     | 1.396(2)   | C(17)-C(18) | 1.381(12) |
| C(1)-H(1)     | 0.88(2)    | C(17)-H(17) | 0.9500    |
| C(2)-C(3)     | 1.401(11)  | C(18)-C(19) | 1.395(11) |



|             |           |               |           |
|-------------|-----------|---------------|-----------|
| C(2)-C(7)   | 1.403(10) | C(18)-H(18)   | 0.9500    |
| C(3)-C(4)   | 1.388(11) | C(19)-H(19)   | 0.9500    |
| C(3)-H(3)   | 0.9500    | C(15A)-C(16A) | 1.367(12) |
| C(4)-C(5)   | 1.379(9)  | C(15A)-H(15A) | 0.9500    |
| C(4)-H(4)   | 0.9500    | C(16A)-C(17A) | 1.385(12) |
| C(5)-C(6)   | 1.372(10) | C(16A)-H(16A) | 0.9500    |
| C(5)-H(5)   | 0.9500    | C(17A)-C(18A) | 1.373(11) |
| C(6)-C(7)   | 1.395(11) | C(17A)-H(17A) | 0.9500    |
| C(6)-H(6)   | 0.9500    | C(18A)-C(19A) | 1.389(10) |
| C(7)-H(7)   | 0.9500    | C(18A)-H(18A) | 0.9500    |
| C(2A)-C(3A) | 1.388(12) | C(19A)-H(19A) | 0.9500    |
| C(2A)-C(7A) | 1.397(10) | C(20)-C(21)   | 1.393(3)  |
| C(3A)-C(4A) | 1.402(10) | C(20)-C(25)   | 1.396(3)  |
| C(3A)-H(3A) | 0.9500    | C(21)-C(22)   | 1.386(3)  |
| C(4A)-C(5A) | 1.382(8)  | C(21)-H(21)   | 0.9500    |
| C(4A)-H(4A) | 0.9500    | C(22)-C(23)   | 1.383(3)  |
| C(5A)-C(6A) | 1.388(10) | C(22)-H(22)   | 0.9500    |
| C(5A)-H(5A) | 0.9500    | C(23)-C(24)   | 1.388(3)  |
| C(6A)-C(7A) | 1.375(11) | C(23)-H(23)   | 0.9500    |
| C(6A)-H(6A) | 0.9500    | C(24)-C(25)   | 1.382(3)  |
| C(7A)-H(7A) | 0.9500    | C(24)-H(24)   | 0.9500    |
| C(8)-C(13)  | 1.394(3)  | C(25)-H(25)   | 0.9500    |
| C(26)-C(27) | 1.393(3)  | C(4S)-H(4S)   | 0.9500    |
| C(26)-C(31) | 1.395(3)  | C(5S)-C(6S)   | 1.3760    |
| C(27)-C(28) | 1.397(3)  | C(5S)-H(5S)   | 0.9500    |
| C(27)-H(27) | 0.9500    | C(6S)-H(6S)   | 0.9500    |
| C(28)-C(29) | 1.370(3)  | C(7SA)-H(7S1) | 0.9800    |
| C(28)-H(28) | 0.9500    | C(7SA)-H(7S2) | 0.9800    |
| C(29)-C(30) | 1.381(3)  | C(7SA)-H(7S3) | 0.9799    |
| C(29)-H(29) | 0.9500    | C(7SB)-H(7S4) | 0.9801    |
| C(30)-C(31) | 1.387(3)  | C(7SB)-H(7S5) | 0.9800    |
| C(30)-H(30) | 0.9500    | C(7SB)-H(7S6) | 0.9801    |
| C(31)-H(31) | 0.9500    | C(1X)-C(6X)   | 1.3732    |
| C(32)-C(33) | 1.386(11) | C(1X)-C(2X)   | 1.3811    |
| C(32)-C(37) | 1.399(12) | C(1X)-H(1X)   | 0.9500    |
| C(33)-C(34) | 1.387(9)  | C(2X)-C(3X)   | 1.3878    |
| C(33)-H(33) | 0.9500    | C(2X)-H(2X)   | 0.9499    |
| C(34)-C(35) | 1.385(9)  | C(3X)-C(4X)   | 1.3859    |
| C(34)-H(34) | 0.9500    | C(3X)-H(3X)   | 0.9500    |
| C(35)-C(36) | 1.379(10) | C(4X)-C(5X)   | 1.3889    |
| C(35)-H(35) | 0.9500    | C(4X)-H(4X)   | 0.9500    |

|               |           |                    |           |
|---------------|-----------|--------------------|-----------|
| C(36)-C(37)   | 1.387(11) | C(5X)-C(6X)        | 1.4000    |
| C(36)-H(36)   | 0.9500    | C(5X)-H(5X)        | 0.9499    |
| C(37)-H(37)   | 0.9500    | C(6X)-H(6X)        | 0.9500    |
| C(32A)-C(37A) | 1.378(12) | C(7XA)-H(7X1)      | 0.9801    |
| C(32A)-C(33A) | 1.392(11) | C(7XA)-H(7X2)      | 0.9800    |
| C(33A)-C(34A) | 1.380(9)  | C(7XA)-H(7X3)      | 0.9800    |
| C(33A)-H(33A) | 0.9500    | C(7XB)-H(7X4)      | 0.9800    |
| C(34A)-C(35A) | 1.378(9)  | C(7XB)-H(7X5)      | 0.9800    |
| C(34A)-H(34A) | 0.9500    | C(7XB)-H(7X6)      | 0.9800    |
| C(35A)-C(36A) | 1.375(10) | C(1T)-C(5T)#2      | 0.506(14) |
| C(35A)-H(35A) | 0.9500    | C(1T)-C(4T)#2      | 0.908(13) |
| C(36A)-C(37A) | 1.389(11) | C(1T)-C(6T)        | 1.3813    |
| C(36A)-H(36A) | 0.9500    | C(1T)-C(2T)        | 1.4052    |
| C(37A)-H(37A) | 0.9500    | C(1T)-C(7T)        | 1.4596    |
| C(1S)-C(2S)   | 1.3887    | C(1T)-C(6T)#2      | 1.591(12) |
| C(1S)-C(6S)   | 1.3918    | C(1T)-C(3T)#2      | 1.912(14) |
| C(1S)-H(1S)   | 0.9500    | C(2T)-C(5T)#2      | 0.930(14) |
| C(2S)-C(3S)   | 1.3986    | C(2T)-C(6T)#2      | 1.101(14) |
| C(2S)-H(2S)   | 0.9497    | C(2T)-C(3T)        | 1.3933    |
| C(3S)-C(4S)   | 1.3866    | C(2T)-H(2T)        | 0.9500    |
| C(3S)-H(3S)   | 0.9500    | C(3T)-C(6T)#2      | 0.910(11) |
| C(4S)-C(5S)   | 1.3909    | C(3T)-C(4T)        | 1.3831    |
| C(3T)-C(1T)#2 | 1.911(12) | C(1V)-C(6V)        | 1.3937    |
| C(3T)-H(3T)   | 0.9499    | C(1V)-C(7V)        | 1.5054    |
| C(4T)-C(1T)#2 | 0.908(12) | C(2V)-C(3V)        | 1.3968    |
| C(4T)-C(7T)#2 | 1.156(15) | C(2V)-H(2V)        | 0.9499    |
| C(4T)-C(6T)#2 | 1.349(13) | C(3V)-C(4V)        | 1.3925    |
| C(4T)-C(5T)   | 1.3813    | C(3V)-H(3V)        | 0.9500    |
| C(4T)-H(4T)   | 0.9501    | C(4V)-C(5V)        | 1.3910    |
| C(5T)-C(1T)#2 | 0.506(12) | C(4V)-H(4V)        | 0.9501    |
| C(5T)-C(2T)#2 | 0.930(18) | C(5V)-C(6V)        | 1.3849    |
| C(5T)-C(6T)   | 1.3960    | C(5V)-H(5V)        | 0.9501    |
| C(5T)-C(7T)#2 | 1.642(17) | C(6V)-H(6V)        | 0.9501    |
| C(5T)-C(6T)#2 | 1.784(14) | C(7V)-H(7V1)       | 0.9801    |
| C(5T)-H(5T)   | 0.9499    | C(7V)-H(7V2)       | 0.9800    |
| C(6T)-C(3T)#2 | 0.910(12) | C(7V)-H(7V3)       | 0.9800    |
| C(6T)-C(2T)#2 | 1.101(15) |                    |           |
| C(6T)-C(4T)#2 | 1.349(16) | N(1)-Zn(1)-N(2)    | 98.82(6)  |
| C(6T)-C(1T)#2 | 1.591(12) | N(1)-Zn(1)-Zn(1)#1 | 133.46(5) |
| C(6T)-C(5T)#2 | 1.784(13) | N(2)-Zn(1)-Zn(1)#1 | 126.65(5) |
| C(6T)-C(6T)#2 | 1.882(12) | N(1)-Zn(1)-P(2)    | 32.84(5)  |

|                   |            |                    |             |
|-------------------|------------|--------------------|-------------|
| C(6T)-H(6T)       | 0.9499     | N(2)-Zn(1)-P(2)    | 82.66(4)    |
| C(7T)-C(4T)#2     | 1.156(18)  | Zn(1)#1-Zn(1)-P(2) | 146.353(13) |
| C(7T)-C(5T)#2     | 1.642(13)  | N(1)-Zn(1)-P(1)    | 91.40(5)    |
| C(7T)-H(7T1)      | 0.9800     | N(2)-Zn(1)-P(1)    | 32.95(4)    |
| C(7T)-H(7T2)      | 0.9799     | Zn(1)#1-Zn(1)-P(1) | 131.495(16) |
| C(7T)-H(7T3)      | 0.9800     | P(2)-Zn(1)-P(1)    | 63.063(14)  |
| C(1U)-C(2U)       | 1.3776     | N(2)-P(1)-C(1)     | 104.14(9)   |
| C(1U)-C(6U)       | 1.3948     | N(2)-P(1)-C(20)    | 110.79(8)   |
| C(1U)-C(7U)       | 1.5243     | C(1)-P(1)-C(20)    | 115.43(9)   |
| C(2U)-C(3U)       | 1.3961     | N(2)-P(1)-C(14)    | 113.33(8)   |
| C(2U)-H(2U)       | 0.9501     | C(1)-P(1)-C(14)    | 106.98(9)   |
| C(3U)-C(4U)       | 1.3897     | C(20)-P(1)-C(14)   | 106.32(9)   |
| C(3U)-H(3U)       | 0.9500     | C(1)-P(1)-Zn(1)    | 63.56(7)    |
| C(4U)-C(5U)       | 1.3876     | C(20)-P(1)-Zn(1)   | 144.19(6)   |
| C(4U)-H(4U)       | 0.9499     | C(14)-P(1)-Zn(1)   | 107.86(7)   |
| C(5U)-C(6U)       | 1.3880     | N(1)-P(2)-C(1)     | 106.95(9)   |
| C(5U)-H(5U)       | 0.9499     | N(1)-P(2)-C(32)    | 107.1(2)    |
| C(6U)-H(6U)       | 0.9500     | C(1)-P(2)-C(32)    | 110.2(3)    |
| C(7U)-H(7U1)      | 0.9800     | N(1)-P(2)-C(26)    | 111.45(9)   |
| C(7U)-H(7U2)      | 0.9800     | C(1)-P(2)-C(26)    | 112.15(9)   |
| C(7U)-H(7U3)      | 0.9800     | C(32)-P(2)-C(26)   | 108.9(4)    |
| C(1V)-C(2V)       | 1.3821     | N(1)-P(2)-C(32A)   | 118.0(2)    |
| C(1)-P(2)-C(32A)  | 102.9(3)   | C(5A)-C(4A)-C(3A)  | 120.8(7)    |
| C(26)-P(2)-C(32A) | 105.2(3)   | C(5A)-C(4A)-H(4A)  | 119.6       |
| C(1)-P(2)-Zn(1)   | 63.67(7)   | C(3A)-C(4A)-H(4A)  | 119.6       |
| C(32)-P(2)-Zn(1)  | 121.2(3)   | C(4A)-C(5A)-C(6A)  | 118.9(7)    |
| C(26)-P(2)-Zn(1)  | 128.14(6)  | C(4A)-C(5A)-H(5A)  | 120.5       |
| C(32A)-P(2)-Zn(1) | 126.5(3)   | C(6A)-C(5A)-H(5A)  | 120.5       |
| C(2A)-N(1)-P(2)   | 122.1(5)   | C(7A)-C(6A)-C(5A)  | 120.1(7)    |
| C(2)-N(1)-P(2)    | 135.6(5)   | C(7A)-C(6A)-H(6A)  | 120.0       |
| C(2A)-N(1)-Zn(1)  | 132.6(6)   | C(5A)-C(6A)-H(6A)  | 120.0       |
| C(2)-N(1)-Zn(1)   | 119.7(5)   | C(6A)-C(7A)-C(2A)  | 122.1(7)    |
| P(2)-N(1)-Zn(1)   | 103.87(8)  | C(6A)-C(7A)-H(7A)  | 118.9       |
| C(8)-N(2)-P(1)    | 128.49(14) | C(2A)-C(7A)-H(7A)  | 118.9       |
| C(8)-N(2)-Zn(1)   | 122.93(13) | C(13)-C(8)-N(2)    | 124.39(19)  |
| P(1)-N(2)-Zn(1)   | 102.72(8)  | C(13)-C(8)-C(9)    | 117.8(2)    |
| P(1)-C(1)-P(2)    | 122.20(11) | N(2)-C(8)-C(9)     | 117.81(19)  |
| P(1)-C(1)-H(1)    | 115.4(14)  | C(10)-C(9)-C(8)    | 120.8(2)    |
| P(2)-C(1)-H(1)    | 117.4(14)  | C(10)-C(9)-H(9)    | 119.6       |
| C(3)-C(2)-C(7)    | 118.4(7)   | C(8)-C(9)-H(9)     | 119.6       |
| C(3)-C(2)-N(1)    | 119.6(9)   | C(11)-C(10)-C(9)   | 120.9(2)    |

|                      |            |                   |          |
|----------------------|------------|-------------------|----------|
| C(7)-C(2)-N(1)       | 122.0(9)   | C(11)-C(10)-H(10) | 119.5    |
| C(4)-C(3)-C(2)       | 120.3(7)   | C(9)-C(10)-H(10)  | 119.5    |
| C(4)-C(3)-H(3)       | 119.8      | C(12)-C(11)-C(10) | 118.8(2) |
| C(2)-C(3)-H(3)       | 119.8      | C(12)-C(11)-H(11) | 120.6    |
| C(5)-C(4)-C(3)       | 120.9(7)   | C(10)-C(11)-H(11) | 120.6    |
| C(5)-C(4)-H(4)       | 119.6      | C(11)-C(12)-C(13) | 121.4(3) |
| C(3)-C(4)-H(4)       | 119.6      | C(11)-C(12)-H(12) | 119.3    |
| C(6)-C(5)-C(4)       | 119.4(7)   | C(13)-C(12)-H(12) | 119.3    |
| C(6)-C(5)-H(5)       | 120.3      | C(12)-C(13)-C(8)  | 120.2(2) |
| C(4)-C(5)-H(5)       | 120.3      | C(12)-C(13)-H(13) | 119.9    |
| C(5)-C(6)-C(7)       | 121.1(7)   | C(8)-C(13)-H(13)  | 119.9    |
| C(5)-C(6)-H(6)       | 119.5      | C(15)-C(14)-C(19) | 118.2(7) |
| C(7)-C(6)-H(6)       | 119.5      | C(15)-C(14)-P(1)  | 118.2(5) |
| C(6)-C(7)-C(2)       | 119.9(7)   | C(19)-C(14)-P(1)  | 123.5(5) |
| C(6)-C(7)-H(7)       | 120.0      | C(14)-C(15)-C(16) | 122.3(8) |
| C(2)-C(7)-H(7)       | 120.0      | C(14)-C(15)-H(15) | 118.8    |
| N(1)-C(2A)-C(3A)     | 130.2(10)  | C(16)-C(15)-H(15) | 118.8    |
| N(1)-C(2A)-C(7A)     | 112.1(10)  | C(17)-C(16)-C(15) | 118.5(8) |
| C(3A)-C(2A)-C(7A)    | 117.6(8)   | C(17)-C(16)-H(16) | 120.7    |
| C(2A)-C(3A)-C(4A)    | 120.5(7)   | C(15)-C(16)-H(16) | 120.7    |
| C(2A)-C(3A)-H(3A)    | 119.8      | C(16)-C(17)-C(18) | 120.5(7) |
| C(4A)-C(3A)-H(3A)    | 119.8      | C(16)-C(17)-H(17) | 119.7    |
| C(18)-C(17)-H(17)    | 119.7      | C(28)-C(27)-H(27) | 120.0    |
| C(17)-C(18)-C(19)    | 119.8(8)   | C(29)-C(28)-C(27) | 120.3(2) |
| C(17)-C(18)-H(18)    | 120.1      | C(29)-C(28)-H(28) | 119.8    |
| C(19)-C(18)-H(18)    | 120.1      | C(27)-C(28)-H(28) | 119.8    |
| C(18)-C(19)-C(14)    | 120.5(8)   | C(28)-C(29)-C(30) | 120.2(2) |
| C(18)-C(19)-H(19)    | 119.7      | C(28)-C(29)-H(29) | 119.9    |
| C(14)-C(19)-H(19)    | 119.7      | C(30)-C(29)-H(29) | 119.9    |
| C(16A)-C(15A)-H(15A) | 120.3      | C(29)-C(30)-C(31) | 120.3(2) |
| C(15A)-C(16A)-C(17A) | 121.6(8)   | C(29)-C(30)-H(30) | 119.9    |
| C(15A)-C(16A)-H(16A) | 119.2      | C(31)-C(30)-H(30) | 119.9    |
| C(17A)-C(16A)-H(16A) | 119.2      | C(30)-C(31)-C(26) | 120.2(2) |
| C(18A)-C(17A)-C(16A) | 119.4(7)   | C(30)-C(31)-H(31) | 119.9    |
| C(18A)-C(17A)-H(17A) | 120.3      | C(26)-C(31)-H(31) | 119.9    |
| C(16A)-C(17A)-H(17A) | 120.3      | C(33)-C(32)-C(37) | 118.6(8) |
| C(17A)-C(18A)-C(19A) | 121.0(7)   | C(33)-C(32)-P(2)  | 122.0(8) |
| C(17A)-C(18A)-H(18A) | 119.5      | C(37)-C(32)-P(2)  | 119.4(7) |
| C(19A)-C(18A)-H(18A) | 119.5      | C(32)-C(33)-C(34) | 120.9(7) |
| C(18A)-C(19A)-H(19A) | 120.0      | C(32)-C(33)-H(33) | 119.5    |
| C(21)-C(20)-C(25)    | 118.53(18) | C(34)-C(33)-H(33) | 119.5    |

|                      |            |                       |           |
|----------------------|------------|-----------------------|-----------|
| C(21)-C(20)-P(1)     | 120.54(14) | C(35)-C(34)-C(33)     | 120.1(6)  |
| C(25)-C(20)-P(1)     | 120.79(15) | C(35)-C(34)-H(34)     | 119.9     |
| C(22)-C(21)-C(20)    | 120.87(18) | C(33)-C(34)-H(34)     | 119.9     |
| C(22)-C(21)-H(21)    | 119.6      | C(36)-C(35)-C(34)     | 119.5(6)  |
| C(20)-C(21)-H(21)    | 119.6      | C(36)-C(35)-H(35)     | 120.2     |
| C(23)-C(22)-C(21)    | 119.88(19) | C(34)-C(35)-H(35)     | 120.2     |
| C(23)-C(22)-H(22)    | 120.1      | C(35)-C(36)-C(37)     | 120.6(7)  |
| C(21)-C(22)-H(22)    | 120.1      | C(35)-C(36)-H(36)     | 119.7     |
| C(22)-C(23)-C(24)    | 120.0(2)   | C(37)-C(36)-H(36)     | 119.7     |
| C(22)-C(23)-H(23)    | 120.0      | C(36)-C(37)-C(32)     | 120.1(8)  |
| C(24)-C(23)-H(23)    | 120.0      | C(36)-C(37)-H(37)     | 119.9     |
| C(25)-C(24)-C(23)    | 120.1(2)   | C(32)-C(37)-H(37)     | 119.9     |
| C(25)-C(24)-H(24)    | 120.0      | C(37A)-C(32A)-C(33A)  | 119.5(7)  |
| C(23)-C(24)-H(24)    | 120.0      | C(37A)-C(32A)-P(2)    | 115.6(7)  |
| C(24)-C(25)-C(20)    | 120.63(19) | C(33A)-C(32A)-P(2)    | 124.6(7)  |
| C(24)-C(25)-H(25)    | 119.7      | C(34A)-C(33A)-C(32A)  | 119.8(7)  |
| C(20)-C(25)-H(25)    | 119.7      | C(34A)-C(33A)-H(33A)  | 120.1     |
| C(27)-C(26)-C(31)    | 119.09(19) | C(32A)-C(33A)-H(33A)  | 120.1     |
| C(27)-C(26)-P(2)     | 121.27(17) | C(35A)-C(34A)-C(33A)  | 120.3(6)  |
| C(31)-C(26)-P(2)     | 119.37(15) | C(35A)-C(34A)-H(34A)  | 119.9     |
| C(26)-C(27)-C(28)    | 119.9(2)   | C(33A)-C(34A)-H(34A)  | 119.9     |
| C(26)-C(27)-H(27)    | 120.0      | C(36A)-C(35A)-C(34A)  | 120.2(6)  |
| C(36A)-C(35A)-H(35A) | 119.9      | C(7T)-C(1T)-C(6T)#2   | 160.7(5)  |
| C(34A)-C(35A)-H(35A) | 119.9      | C(5T)#2-C(1T)-C(3T)#2 | 162.9(18) |
| C(35A)-C(36A)-C(37A) | 119.8(7)   | C(2T)-C(1T)-C(3T)#2   | 147.1(6)  |
| C(35A)-C(36A)-H(36A) | 120.1      | C(7T)-C(1T)-C(3T)#2   | 94.7(6)   |
| C(37A)-C(36A)-H(36A) | 120.1      | C(6T)#2-C(1T)-C(3T)#2 | 104.5(7)  |
| C(32A)-C(37A)-C(36A) | 120.3(8)   | C(5T)#2-C(2T)-C(6T)#2 | 86.4(9)   |
| C(32A)-C(37A)-H(37A) | 119.8      | C(5T)#2-C(2T)-C(3T)   | 127.1(8)  |
| C(36A)-C(37A)-H(37A) | 119.8      | C(6T)#2-C(2T)-C(1T)   | 77.8(6)   |
| C(2S)-C(1S)-C(6S)    | 119.4      | C(3T)-C(2T)-C(1T)     | 118.5     |
| C(2S)-C(1S)-H(1S)    | 120.3      | C(6T)#2-C(3T)-C(4T)   | 68.5(9)   |
| C(6S)-C(1S)-H(1S)    | 120.3      | C(6T)#2-C(3T)-C(2T)   | 52.1(9)   |
| C(1S)-C(2S)-C(3S)    | 119.7      | C(4T)-C(3T)-C(2T)     | 120.7     |
| C(4S)-C(3S)-C(2S)    | 120.6      | C(2T)-C(3T)-C(1T)#2   | 94.4(4)   |
| C(3S)-C(4S)-C(5S)    | 119.1      | C(1T)#2-C(4T)-C(7T)#2 | 89.2(14)  |
| C(3S)-C(4S)-H(4S)    | 120.5      | C(1T)#2-C(4T)-C(6T)#2 | 72.5(8)   |
| C(5S)-C(4S)-H(4S)    | 120.5      | C(7T)#2-C(4T)-C(6T)#2 | 161.7(16) |
| C(6S)-C(5S)-C(4S)    | 120.5      | C(7T)#2-C(4T)-C(5T)   | 80.1(12)  |
| C(5S)-C(6S)-C(1S)    | 120.7      | C(6T)#2-C(4T)-C(5T)   | 81.6(5)   |
| C(6X)-C(1X)-C(2X)    | 120.1      | C(1T)#2-C(4T)-C(3T)   | 111.4(8)  |

|                       |           |                       |           |
|-----------------------|-----------|-----------------------|-----------|
| C(6X)-C(1X)-H(1X)     | 119.9     | C(7T)#2-C(4T)-C(3T)   | 159.4(12) |
| C(2X)-C(1X)-H(1X)     | 119.9     | C(5T)-C(4T)-C(3T)     | 120.5     |
| H(5S)-C(1X)-H(1X)     | 47.9      | C(1T)#2-C(5T)-C(2T)#2 | 155(2)    |
| C(1X)-C(2X)-C(3X)     | 120.2     | C(2T)#2-C(5T)-C(4T)   | 171.7(10) |
| C(4X)-C(3X)-C(2X)     | 119.5     | C(1T)#2-C(5T)-C(6T)   | 103.4(14) |
| C(3X)-C(4X)-C(5X)     | 121.0     | C(2T)#2-C(5T)-C(6T)   | 51.9(10)  |
| C(3X)-C(4X)-H(4X)     | 119.5     | C(4T)-C(5T)-C(6T)     | 119.8     |
| C(5X)-C(4X)-H(4X)     | 119.5     | C(1T)#2-C(5T)-C(7T)#2 | 60.3(16)  |
| C(4X)-C(5X)-C(6X)     | 118.3     | C(2T)#2-C(5T)-C(7T)#2 | 144.3(11) |
| C(1X)-C(6X)-C(5X)     | 120.9     | C(6T)-C(5T)-C(7T)#2   | 163.7(8)  |
| C(5T)#2-C(1T)-C(4T)#2 | 154(2)    | C(2T)#2-C(5T)-C(6T)#2 | 123.3(12) |
| C(5T)#2-C(1T)-C(6T)   | 136.8(14) | C(4T)-C(5T)-C(6T)#2   | 48.4(4)   |
| C(4T)#2-C(1T)-C(6T)   | 68.7(11)  | C(6T)-C(5T)-C(6T)#2   | 71.4(4)   |
| C(4T)#2-C(1T)-C(2T)   | 170.5(11) | C(7T)#2-C(5T)-C(6T)#2 | 92.3(8)   |
| C(6T)-C(1T)-C(2T)     | 120.8     | C(3T)#2-C(6T)-C(2T)#2 | 87.1(10)  |
| C(5T)#2-C(1T)-C(7T)   | 102.1(14) | C(3T)#2-C(6T)-C(4T)#2 | 72.6(10)  |
| C(4T)#2-C(1T)-C(7T)   | 52.4(11)  | C(2T)#2-C(6T)-C(4T)#2 | 159.7(11) |
| C(6T)-C(1T)-C(7T)     | 121.0     | C(3T)#2-C(6T)-C(1T)   | 111.4(13) |
| C(2T)-C(1T)-C(7T)     | 118.2     | C(2T)#2-C(6T)-C(1T)   | 161.4(10) |
| C(5T)#2-C(1T)-C(6T)#2 | 58.6(12)  | C(3T)#2-C(6T)-C(5T)   | 128.8(13) |
| C(4T)#2-C(1T)-C(6T)#2 | 146.9(13) | C(4T)#2-C(6T)-C(5T)   | 158.6(6)  |
| C(6T)-C(1T)-C(6T)#2   | 78.2(5)   | C(1T)-C(6T)-C(5T)     | 119.8     |
| C(3T)#2-C(6T)-C(1T)#2 | 146.8(16) | C(2U)-C(1U)-C(6U)     | 119.3     |
| C(2T)#2-C(6T)-C(1T)#2 | 59.7(9)   | C(2U)-C(1U)-C(7U)     | 122.6     |
| C(4T)#2-C(6T)-C(1T)#2 | 140.6(10) | C(6U)-C(1U)-C(7U)     | 118.1     |
| C(1T)-C(6T)-C(1T)#2   | 101.8(4)  | C(1U)-C(2U)-C(3U)     | 120.7     |
| C(3T)#2-C(6T)-C(5T)#2 | 122.6(14) | C(4U)-C(3U)-C(2U)     | 119.8     |
| C(2T)#2-C(6T)-C(5T)#2 | 150.2(11) | C(5U)-C(4U)-C(3U)     | 119.8     |
| C(4T)#2-C(6T)-C(5T)#2 | 50.0(5)   | C(4U)-C(5U)-C(6U)     | 120.0     |
| C(5T)-C(6T)-C(5T)#2   | 108.6(4)  | C(5U)-C(6U)-C(1U)     | 120.5     |
| C(1T)#2-C(6T)-C(5T)#2 | 90.6(6)   | C(2V)-C(1V)-C(6V)     | 119.7     |
| C(3T)#2-C(6T)-C(6T)#2 | 167.2(15) | C(2V)-C(1V)-C(7V)     | 121.7     |
| C(2T)#2-C(6T)-C(6T)#2 | 105.6(10) | C(6V)-C(1V)-C(7V)     | 118.6     |
| C(4T)#2-C(6T)-C(6T)#2 | 94.7(7)   | C(1V)-C(2V)-C(3V)     | 120.4     |
| C(1T)-C(6T)-C(6T)#2   | 55.8(4)   | C(4V)-C(3V)-C(2V)     | 119.7     |
| C(5T)-C(6T)-C(6T)#2   | 63.9(4)   | C(5V)-C(4V)-C(3V)     | 119.9     |
| C(1T)#2-C(6T)-C(6T)#2 | 45.9(3)   | C(6V)-C(5V)-C(4V)     | 120.1     |
| C(4T)#2-C(7T)-C(5T)#2 | 56.0(5)   | C(5V)-C(6V)-C(1V)     | 120.3     |

Symmetry transformations used to generate equivalent atoms: #1 -x,y,-z+1/2 #2 -x+1/2,-y+3/2,-z+1

Table 4. Anisotropic displacement parameters ( $\text{\AA}^2 \times 10^3$ ) for **1**. The anisotropic displacement factor exponent takes the form:  $-2 \pi^2 [ h^2 a^{*2} U_{11} + \dots + 2 h k a^* b^* U_{12} ]$

|        | <b>U11</b> | <b>U22</b> | <b>U33</b> | <b>U23</b> | <b>U13</b> | <b>U12</b> |
|--------|------------|------------|------------|------------|------------|------------|
| Zn(1)  | 19(1)      | 24(1)      | 22(1)      | 0(1)       | 6(1)       | -1(1)      |
| P(1)   | 19(1)      | 16(1)      | 19(1)      | 0(1)       | 6(1)       | -2(1)      |
| P(2)   | 23(1)      | 19(1)      | 17(1)      | 0(1)       | 6(1)       | 4(1)       |
| N(1)   | 21(1)      | 29(1)      | 19(1)      | -3(1)      | 3(1)       | -1(1)      |
| N(2)   | 20(1)      | 17(1)      | 26(1)      | 2(1)       | 9(1)       | -1(1)      |
| C(1)   | 24(1)      | 16(1)      | 20(1)      | -2(1)      | 6(1)       | -2(1)      |
| C(2)   | 15(3)      | 21(5)      | 11(3)      | -1(3)      | 4(3)       | -1(3)      |
| C(3)   | 26(3)      | 26(4)      | 25(3)      | -1(3)      | 16(3)      | -6(3)      |
| C(4)   | 30(4)      | 40(5)      | 17(3)      | -1(3)      | 8(2)       | 2(4)       |
| C(5)   | 20(3)      | 40(5)      | 31(5)      | -11(4)     | 10(3)      | -6(3)      |
| C(6)   | 22(3)      | 26(4)      | 36(4)      | -8(3)      | 16(3)      | -11(3)     |
| C(7)   | 22(3)      | 14(4)      | 22(4)      | -1(3)      | 12(3)      | -6(3)      |
| C(2A)  | 21(3)      | 15(4)      | 30(5)      | -3(3)      | 18(3)      | -4(2)      |
| C(3A)  | 15(3)      | 22(4)      | 18(3)      | 1(3)       | 6(2)       | -4(2)      |
| C(4A)  | 16(3)      | 31(4)      | 20(3)      | 0(3)       | 5(2)       | 4(3)       |
| C(5A)  | 20(3)      | 34(5)      | 24(3)      | -6(3)      | 8(2)       | -3(3)      |
| C(6A)  | 30(3)      | 25(4)      | 39(5)      | -6(3)      | 22(4)      | -11(3)     |
| C(7A)  | 27(3)      | 16(5)      | 20(3)      | 6(2)       | 12(3)      | -1(3)      |
| C(8)   | 32(1)      | 20(1)      | 37(1)      | 5(1)       | 23(1)      | 2(1)       |
| C(9)   | 40(1)      | 25(1)      | 58(2)      | 3(1)       | 31(1)      | -2(1)      |
| C(10)  | 66(2)      | 22(1)      | 95(2)      | 10(1)      | 57(2)      | -1(1)      |
| C(11)  | 78(2)      | 32(1)      | 93(2)      | 34(1)      | 63(2)      | 22(1)      |
| C(12)  | 51(2)      | 49(2)      | 73(2)      | 39(1)      | 38(2)      | 23(1)      |
| C(13)  | 36(1)      | 33(1)      | 48(1)      | 19(1)      | 21(1)      | 6(1)       |
| C(14)  | 24(1)      | 21(1)      | 20(1)      | -1(1)      | 5(1)       | -3(1)      |
| C(15)  | 27(5)      | 16(3)      | 30(5)      | 5(3)       | 4(3)       | -9(3)      |
| C(16)  | 48(8)      | 32(7)      | 10(4)      | -4(3)      | 13(4)      | -9(4)      |
| C(17)  | 36(4)      | 23(3)      | 23(3)      | 4(2)       | -1(3)      | -13(3)     |
| C(18)  | 27(3)      | 26(3)      | 35(3)      | 2(2)       | 3(2)       | -6(2)      |
| C(19)  | 33(4)      | 21(2)      | 33(4)      | 2(2)       | 6(3)       | 0(2)       |
| C(14A) | 24(1)      | 21(1)      | 20(1)      | -1(1)      | 5(1)       | -3(1)      |
| C(15A) | 23(4)      | 20(3)      | 13(3)      | 1(3)       | 11(3)      | -4(3)      |
| C(16A) | 23(5)      | 35(7)      | 41(7)      | -2(5)      | 11(4)      | -14(4)     |
| C(17A) | 40(5)      | 71(8)      | 21(4)      | -17(4)     | 10(4)      | -6(5)      |
| C(18A) | 22(3)      | 119(10)    | 33(4)      | -30(5)     | -1(3)      | -2(5)      |
| C(19A) | 18(3)      | 87(8)      | 29(4)      | -22(5)     | 5(3)       | 7(4)       |
| C(20)  | 20(1)      | 19(1)      | 23(1)      | 2(1)       | 7(1)       | -1(1)      |
| C(21)  | 25(1)      | 18(1)      | 28(1)      | 0(1)       | 10(1)      | -4(1)      |

|        |        |       |         |        |        |        |
|--------|--------|-------|---------|--------|--------|--------|
| C(22)  | 33(1)  | 19(1) | 34(1)   | -1(1)  | 15(1)  | 2(1)   |
| C(23)  | 31(1)  | 28(1) | 49(1)   | 2(1)   | 24(1)  | 3(1)   |
| C(24)  | 31(1)  | 25(1) | 61(2)   | -2(1)  | 28(1)  | -6(1)  |
| C(25)  | 30(1)  | 20(1) | 47(1)   | -4(1)  | 21(1)  | -4(1)  |
| C(26)  | 27(1)  | 22(1) | 19(1)   | 1(1)   | 7(1)   | 8(1)   |
| C(27)  | 24(1)  | 29(1) | 30(1)   | -7(1)  | 5(1)   | 6(1)   |
| C(28)  | 35(1)  | 34(1) | 31(1)   | -10(1) | 6(1)   | 14(1)  |
| C(29)  | 42(1)  | 39(1) | 30(1)   | 0(1)   | 18(1)  | 17(1)  |
| C(30)  | 48(1)  | 30(1) | 39(1)   | 8(1)   | 29(1)  | 11(1)  |
| C(31)  | 42(1)  | 21(1) | 29(1)   | 3(1)   | 19(1)  | 7(1)   |
| C(32)  | 15(3)  | 14(3) | 20(3)   | -4(2)  | 6(3)   | -10(2) |
| C(33)  | 20(3)  | 19(3) | 25(2)   | 0(2)   | 9(3)   | 0(2)   |
| C(34)  | 44(4)  | 38(4) | 28(3)   | 13(3)  | 16(3)  | 16(3)  |
| C(35)  | 58(5)  | 40(4) | 47(4)   | 16(3)  | 26(4)  | 27(3)  |
| C(36)  | 51(6)  | 41(5) | 44(5)   | 10(3)  | 32(5)  | 19(4)  |
| C(37)  | 27(5)  | 24(3) | 27(3)   | 1(2)   | 16(3)  | 4(3)   |
| C(32A) | 10(3)  | 11(3) | 22(3)   | -1(2)  | 4(2)   | -3(2)  |
| C(33A) | 25(4)  | 20(3) | 26(3)   | 2(2)   | 14(3)  | -2(2)  |
| C(34A) | 33(4)  | 24(3) | 34(3)   | 9(2)   | 16(3)  | 4(2)   |
| C(35A) | 27(3)  | 19(3) | 36(3)   | 4(2)   | 8(3)   | 6(2)   |
| C(36A) | 30(4)  | 32(4) | 32(3)   | -5(2)  | 11(3)  | 10(3)  |
| C(37A) | 23(4)  | 31(4) | 27(3)   | 4(3)   | 10(3)  | 1(3)   |
| C(1S)  | 63(5)  | 26(3) | 65(5)   | -7(3)  | 34(5)  | -13(3) |
| C(2S)  | 75(10) | 37(6) | 34(4)   | -1(3)  | 28(5)  | -26(5) |
| C(3S)  | 48(4)  | 27(3) | 39(3)   | 14(2)  | 12(2)  | -8(2)  |
| C(4S)  | 43(4)  | 27(3) | 42(3)   | 12(2)  | 15(3)  | 6(2)   |
| C(5S)  | 39(4)  | 46(3) | 37(2)   | 12(2)  | 14(3)  | 1(3)   |
| C(6S)  | 38(3)  | 32(2) | 52(3)   | 11(2)  | 18(3)  | 0(2)   |
| C(7SA) | 59(5)  | 33(4) | 55(5)   | -24(4) | 38(5)  | -25(4) |
| C(7SB) | 35(5)  | 47(5) | 59(5)   | -7(4)  | 18(4)  | -4(4)  |
| C(1X)  | 47(6)  | 24(3) | 87(8)   | 17(4)  | 26(6)  | 5(4)   |
| C(2X)  | 36(5)  | 35(4) | 110(11) | 47(6)  | 10(6)  | 8(4)   |
| C(3X)  | 57(6)  | 29(5) | 72(6)   | 21(5)  | 5(5)   | -16(4) |
| C(4X)  | 53(13) | 17(7) | 120(14) | 1(7)   | 21(10) | -15(7) |
| C(5X)  | 43(6)  | 27(6) | 98(11)  | 8(6)   | 23(7)  | -1(4)  |
| C(6X)  | 28(5)  | 42(5) | 68(6)   | 15(4)  | 4(4)   | 6(4)   |
| C(7XA) | 88(8)  | 50(6) | 76(7)   | 10(5)  | 43(7)  | -4(6)  |



Table 5. Hydrogen coordinates (  $\times 10^4$ ) and isotropic displacement parameters ( $\text{\AA}^2 \times 10^3$ ) for **1**.

|        | <b>x</b> | <b>y</b> | <b>z</b> | <b>U(eq)</b> |
|--------|----------|----------|----------|--------------|
| H(1)   | 809(8)   | 3980(20) | 2143(8)  | 24(5)        |
| H(3)   | -674     | 2241     | 469      | 29           |
| H(4)   | -1466    | 1432     | -114     | 36           |
| H(5)   | -1876    | -115     | 147      | 38           |
| H(6)   | -1486    | -901     | 990      | 32           |
| H(7)   | -686     | -149     | 1584     | 22           |
| H(3A)  | -621     | 2579     | 442      | 23           |
| H(4A)  | -1431    | 1922     | -164     | 28           |
| H(5A)  | -1872    | 353      | 54       | 33           |
| H(6A)  | -1490    | -585     | 886      | 35           |
| H(7A)  | -691     | 68       | 1484     | 25           |
| H(9)   | 358      | -1628    | 2251     | 45           |
| H(10)  | 612      | -3772    | 2631     | 64           |
| H(11)  | 1442     | -4180    | 3231     | 70           |
| H(12)  | 2014     | -2403    | 3467     | 65           |
| H(13)  | 1772     | -233     | 3104     | 47           |
| H(15)  | 938      | 2650     | 3181     | 35           |
| H(16)  | 1351     | 3461     | 4032     | 37           |
| H(17)  | 2206     | 3893     | 4425     | 41           |
| H(18)  | 2639     | 3548     | 3973     | 41           |
| H(19)  | 2214     | 2786     | 3118     | 39           |
| H(15A) | 886      | 3043     | 3109     | 22           |
| H(16A) | 1283     | 3599     | 3974     | 42           |
| H(17A) | 2148     | 3511     | 4470     | 55           |
| H(18A) | 2625     | 2934     | 4087     | 77           |
| H(19A) | 2247     | 2290     | 3222     | 57           |
| H(21)  | 1412     | -413     | 1983     | 30           |
| H(22)  | 1965     | -855     | 1674     | 35           |
| H(23)  | 2524     | 836      | 1724     | 41           |
| H(24)  | 2505     | 3004     | 2049     | 44           |
| H(25)  | 1935     | 3471     | 2332     | 38           |
| H(27)  | 120      | 407      | 786      | 38           |
| H(28)  | 508      | -431     | 329      | 45           |
| H(29)  | 1151     | 786      | 320      | 44           |
| H(30)  | 1405     | 2876     | 749      | 43           |
| H(31)  | 1018     | 3749     | 1196     | 36           |
| H(33)  | -20      | 4313     | 491      | 26           |
| H(34)  | -470     | 6317     | 137      | 45           |

|        |      |      |      |     |
|--------|------|------|------|-----|
| H(35)  | -805 | 7539 | 574  | 58  |
| H(36)  | -686 | 6743 | 1365 | 50  |
| H(37)  | -243 | 4726 | 1719 | 30  |
| H(33A) | 109  | 4600 | 533  | 27  |
| H(34A) | -274 | 6719 | 234  | 37  |
| H(35A) | -574 | 7947 | 697  | 36  |
| H(36A) | -514 | 7038 | 1449 | 40  |
| H(37A) | -144 | 4893 | 1744 | 34  |
| H(1S)  | 781  | 7320 | 1367 | 60  |
| H(2S)  | 1552 | 6705 | 2069 | 58  |
| H(3S)  | 2168 | 5716 | 1924 | 51  |
| H(4S)  | 2014 | 5303 | 1083 | 47  |
| H(5S)  | 1235 | 5875 | 387  | 51  |
| H(6S)  | 630  | 6896 | 527  | 51  |
| H(7S1) | 346  | 7726 | 1014 | 66  |
| H(7S2) | 747  | 8451 | 1536 | 66  |
| H(7S3) | 526  | 6981 | 1556 | 66  |
| H(7S4) | 2013 | 5044 | 667  | 73  |
| H(7S5) | 2248 | 4232 | 1202 | 73  |
| H(7S6) | 2436 | 5748 | 1181 | 73  |
| H(1X)  | 1589 | 5842 | 559  | 67  |
| H(2X)  | 2228 | 5163 | 1362 | 85  |
| H(3X)  | 2159 | 5546 | 2102 | 77  |
| H(4X)  | 1457 | 6654 | 2034 | 87  |
| H(5X)  | 810  | 7338 | 1229 | 73  |
| H(6X)  | 888  | 6926 | 490  | 65  |
| H(7X1) | 1942 | 5311 | 527  | 105 |
| H(7X2) | 1601 | 6612 | 243  | 105 |
| H(7X3) | 1351 | 5134 | 181  | 105 |
| H(7X4) | 1127 | 7150 | 2094 | 114 |
| H(7X5) | 1721 | 7231 | 2433 | 114 |
| H(7X6) | 1444 | 5784 | 2337 | 114 |
| H(2T)  | 2950 | 7014 | 4485 | 58  |
| H(3T)  | 2182 | 5860 | 4127 | 49  |
| H(4T)  | 1671 | 6060 | 4497 | 48  |
| H(5T)  | 1908 | 7433 | 5221 | 71  |
| H(6T)  | 2676 | 8591 | 5590 | 56  |
| H(7T1) | 3511 | 8476 | 5073 | 78  |
| H(7T2) | 3580 | 8275 | 5639 | 78  |
| H(7T3) | 3307 | 9614 | 5311 | 78  |
| H(2U)  | 2974 | 8333 | 5791 | 49  |

|        |      |       |      |    |
|--------|------|-------|------|----|
| H(3U)  | 2323 | 6899  | 5697 | 64 |
| H(4U)  | 1779 | 5956  | 4890 | 73 |
| H(5U)  | 1893 | 6434  | 4183 | 55 |
| H(6U)  | 2541 | 7870  | 4280 | 67 |
| H(7U1) | 3229 | 9208  | 4754 | 77 |
| H(7U2) | 3563 | 8786  | 5346 | 77 |
| H(7U3) | 3199 | 10084 | 5193 | 77 |
| H(2V)  | 2095 | 6580  | 4182 | 50 |
| H(3V)  | 2819 | 7435  | 4204 | 39 |
| H(4V)  | 3428 | 8529  | 4949 | 40 |
| H(5V)  | 3304 | 8790  | 5662 | 60 |
| H(6V)  | 2585 | 7925  | 5638 | 34 |
| H(7V1) | 1831 | 6832  | 5238 | 65 |
| H(7V2) | 1780 | 5655  | 4840 | 65 |
| H(7V3) | 1515 | 7107  | 4631 | 65 |

Table 6. Torsion angles [deg] for **1**.

|                          |             |                          |             |
|--------------------------|-------------|--------------------------|-------------|
| N(1)-Zn(1)-P(1)-N(2)     | -104.14(9)  | C(26)-P(2)-N(1)-C(2)     | -67.7(8)    |
| Zn(1)#1-Zn(1)-P(1)-N(2)  | 95.77(8)    | C(32A)-P(2)-N(1)-C(2)    | 54.2(9)     |
| P(2)-Zn(1)-P(1)-N(2)     | -121.37(8)  | Zn(1)-P(2)-N(1)-C(2)     | 168.9(8)    |
| N(1)-Zn(1)-P(1)-C(1)     | 49.95(8)    | C(1)-P(2)-N(1)-Zn(1)     | 0.51(11)    |
| N(2)-Zn(1)-P(1)-C(1)     | 154.09(11)  | C(32)-P(2)-N(1)-Zn(1)    | -117.6(4)   |
| Zn(1)#1-Zn(1)-P(1)-C(1)  | -110.14(7)  | C(26)-P(2)-N(1)-Zn(1)    | 123.42(9)   |
| P(2)-Zn(1)-P(1)-C(1)     | 32.72(7)    | C(32A)-P(2)-N(1)-Zn(1)   | -114.7(4)   |
| N(1)-Zn(1)-P(1)-C(20)    | -47.55(11)  | N(2)-Zn(1)-N(1)-C(2A)    | 132.5(8)    |
| N(2)-Zn(1)-P(1)-C(20)    | 56.59(13)   | Zn(1)#1-Zn(1)-N(1)-C(2A) | -35.8(8)    |
| Zn(1)#1-Zn(1)-P(1)-C(20) | 152.36(10)  | P(2)-Zn(1)-N(1)-C(2A)    | -166.1(8)   |
| P(2)-Zn(1)-P(1)-C(20)    | -64.78(10)  | P(1)-Zn(1)-N(1)-C(2A)    | 164.8(8)    |
| N(1)-Zn(1)-P(1)-C(14)    | 150.46(8)   | N(2)-Zn(1)-N(1)-C(2)     | 127.5(6)    |
| N(2)-Zn(1)-P(1)-C(14)    | -105.39(10) | Zn(1)#1-Zn(1)-N(1)-C(2)  | -40.8(6)    |
| Zn(1)#1-Zn(1)-P(1)-C(14) | -9.63(7)    | P(2)-Zn(1)-N(1)-C(2)     | -171.1(7)   |
| P(2)-Zn(1)-P(1)-C(14)    | 133.23(6)   | P(1)-Zn(1)-N(1)-C(2)     | 159.8(6)    |
| N(2)-Zn(1)-P(2)-N(1)     | 118.99(10)  | N(2)-Zn(1)-N(1)-P(2)     | -61.39(9)   |
| Zn(1)#1-Zn(1)-P(2)-N(1)  | -87.79(9)   | Zn(1)#1-Zn(1)-N(1)-P(2)  | 130.29(6)   |
| P(1)-Zn(1)-P(2)-N(1)     | 146.91(9)   | P(1)-Zn(1)-N(1)-P(2)     | -29.13(8)   |
| N(1)-Zn(1)-P(2)-C(1)     | -179.45(12) | C(1)-P(1)-N(2)-C(8)      | -176.87(17) |
| N(2)-Zn(1)-P(2)-C(1)     | -60.46(8)   | C(20)-P(1)-N(2)-C(8)     | 58.42(19)   |
| Zn(1)#1-Zn(1)-P(2)-C(1)  | 92.76(8)    | C(14)-P(1)-N(2)-C(8)     | -60.99(19)  |
| P(1)-Zn(1)-P(2)-C(1)     | -32.54(7)   | Zn(1)-P(1)-N(2)-C(8)     | -153.1(2)   |

|                           |            |                             |             |
|---------------------------|------------|-----------------------------|-------------|
| N(1)-Zn(1)-P(2)-C(32)     | 81.8(3)    | C(1)-P(1)-N(2)-Zn(1)        | -23.79(10)  |
| N(2)-Zn(1)-P(2)-C(32)     | -159.2(3)  | C(20)-P(1)-N(2)-Zn(1)       | -148.50(8)  |
| Zn(1)#1-Zn(1)-P(2)-C(32)  | -6.0(3)    | C(14)-P(1)-N(2)-Zn(1)       | 92.09(9)    |
| P(1)-Zn(1)-P(2)-C(32)     | -131.3(3)  | N(1)-Zn(1)-N(2)-C(8)        | -126.16(15) |
| N(1)-Zn(1)-P(2)-C(26)     | -81.05(12) | Zn(1)#1-Zn(1)-N(2)-C(8)     | 43.28(17)   |
| N(2)-Zn(1)-P(2)-C(26)     | 37.94(9)   | P(2)-Zn(1)-N(2)-C(8)        | -154.85(15) |
| Zn(1)#1-Zn(1)-P(2)-C(26)  | -168.83(8) | P(1)-Zn(1)-N(2)-C(8)        | 155.0(2)    |
| P(1)-Zn(1)-P(2)-C(26)     | 65.86(8)   | N(1)-Zn(1)-N(2)-P(1)        | 78.81(9)    |
| N(1)-Zn(1)-P(2)-C(32A)    | 93.8(3)    | Zn(1)#1-Zn(1)-N(2)-P(1)     | -111.74(6)  |
| N(2)-Zn(1)-P(2)-C(32A)    | -147.2(3)  | P(2)-Zn(1)-N(2)-P(1)        | 50.13(7)    |
| Zn(1)#1-Zn(1)-P(2)-C(32A) | 6.0(3)     | N(2)-P(1)-C(1)-P(2)         | -53.55(15)  |
| P(1)-Zn(1)-P(2)-C(32A)    | -119.3(3)  | C(20)-P(1)-C(1)-P(2)        | 68.12(15)   |
| C(1)-P(2)-N(1)-C(2A)      | 168.5(7)   | C(14)-P(1)-C(1)-P(2)        | -173.81(12) |
| C(32)-P(2)-N(1)-C(2A)     | 50.3(8)    | Zn(1)-P(1)-C(1)-P(2)        | -71.90(11)  |
| C(26)-P(2)-N(1)-C(2A)     | -68.6(7)   | N(1)-P(2)-C(1)-P(1)         | 71.67(15)   |
| C(32A)-P(2)-N(1)-C(2A)    | 53.2(8)    | C(32)-P(2)-C(1)-P(1)        | -172.3(3)   |
| Zn(1)-P(2)-N(1)-C(2A)     | 167.9(7)   | C(26)-P(2)-C(1)-P(1)        | -50.79(16)  |
| C(1)-P(2)-N(1)-C(2)       | 169.4(8)   | C(32A)-P(2)-C(1)-P(1)       | -163.4(3)   |
| C(32)-P(2)-N(1)-C(2)      | 51.3(9)    | Zn(1)-P(2)-C(1)-P(1)        | 72.07(11)   |
| C(2A)-N(1)-C(2)-C(3)      | 4(4)       | C(20)-P(1)-C(14)-C(15)      | -172.6(5)   |
| P(2)-N(1)-C(2)-C(3)       | 0.0(13)    | Zn(1)-P(1)-C(14)-C(15)      | -3.5(5)     |
| Zn(1)-N(1)-C(2)-C(3)      | 167.6(5)   | N(2)-P(1)-C(14)-C(19)       | 127.5(4)    |
| C(2A)-N(1)-C(2)-C(7)      | -175(6)    | C(1)-P(1)-C(14)-C(19)       | -118.3(4)   |
| P(2)-N(1)-C(2)-C(7)       | -178.9(5)  | C(20)-P(1)-C(14)-C(19)      | 5.6(4)      |
| Zn(1)-N(1)-C(2)-C(7)      | -11.3(10)  | Zn(1)-P(1)-C(14)-C(19)      | 174.7(4)    |
| C(7)-C(2)-C(3)-C(4)       | 1.0(4)     | C(19)-C(14)-C(15)-C(16)     | -0.7(4)     |
| N(1)-C(2)-C(3)-C(4)       | -177.9(11) | P(1)-C(14)-C(15)-C(16)      | 177.6(3)    |
| C(2)-C(3)-C(4)-C(5)       | 0.2(4)     | C(14)-C(15)-C(16)-C(17)     | -0.3(5)     |
| C(3)-C(4)-C(5)-C(6)       | -0.9(8)    | C(15)-C(16)-C(17)-C(18)     | 0.6(9)      |
| C(4)-C(5)-C(6)-C(7)       | 0.2(10)    | C(16)-C(17)-C(18)-C(19)     | 0.2(11)     |
| C(5)-C(6)-C(7)-C(2)       | 1.1(9)     | C(17)-C(18)-C(19)-C(14)     | -1.2(10)    |
| C(3)-C(2)-C(7)-C(6)       | -1.7(7)    | C(15)-C(14)-C(19)-C(18)     | 1.5(8)      |
| N(1)-C(2)-C(7)-C(6)       | 177.3(12)  | P(1)-C(14)-C(19)-C(18)      | -176.7(5)   |
| P(2)-N(1)-C(2A)-C(3A)     | -2.6(13)   | C(15A)-C(16A)-C(17A)-C(18A) | 0.9(10)     |
| Zn(1)-N(1)-C(2A)-C(3A)    | 161.4(6)   | C(16A)-C(17A)-C(18A)-C(19A) | -2.1(13)    |
| C(2)-N(1)-C(2A)-C(7A)     | 5(5)       | N(2)-P(1)-C(20)-C(21)       | 5.89(18)    |
| P(2)-N(1)-C(2A)-C(7A)     | -178.1(4)  | C(1)-P(1)-C(20)-C(21)       | -112.14(16) |
| Zn(1)-N(1)-C(2A)-C(7A)    | -14.1(11)  | C(14)-P(1)-C(20)-C(21)      | 129.42(16)  |
| N(1)-C(2A)-C(3A)-C(4A)    | -175.2(13) | Zn(1)-P(1)-C(20)-C(21)      | -32.7(2)    |
| C(7A)-C(2A)-C(3A)-C(4A)   | 0.1(3)     | N(2)-P(1)-C(20)-C(25)       | -178.56(16) |
| C(2A)-C(3A)-C(4A)-C(5A)   | 0.1(3)     | C(1)-P(1)-C(20)-C(25)       | 63.41(19)   |

|                         |             |                             |             |
|-------------------------|-------------|-----------------------------|-------------|
| C(3A)-C(4A)-C(5A)-C(6A) | -0.4(6)     | C(14)-P(1)-C(20)-C(25)      | -55.02(18)  |
| C(4A)-C(5A)-C(6A)-C(7A) | 0.5(8)      | Zn(1)-P(1)-C(20)-C(25)      | 142.84(14)  |
| C(5A)-C(6A)-C(7A)-C(2A) | -0.3(8)     | C(25)-C(20)-C(21)-C(22)     | 1.7(3)      |
| N(1)-C(2A)-C(7A)-C(6A)  | 176.1(11)   | P(1)-C(20)-C(21)-C(22)      | 177.40(15)  |
| C(3A)-C(2A)-C(7A)-C(6A) | 0.0(6)      | C(20)-C(21)-C(22)-C(23)     | 0.5(3)      |
| P(1)-N(2)-C(8)-C(13)    | 7.8(3)      | C(21)-C(22)-C(23)-C(24)     | -1.7(3)     |
| Zn(1)-N(2)-C(8)-C(13)   | -140.48(18) | C(22)-C(23)-C(24)-C(25)     | 0.6(4)      |
| P(1)-N(2)-C(8)-C(9)     | -173.06(16) | C(23)-C(24)-C(25)-C(20)     | 1.8(4)      |
| Zn(1)-N(2)-C(8)-C(9)    | 38.7(2)     | C(21)-C(20)-C(25)-C(24)     | -2.9(3)     |
| C(13)-C(8)-C(9)-C(10)   | -1.0(3)     | P(1)-C(20)-C(25)-C(24)      | -178.53(18) |
| N(2)-C(8)-C(9)-C(10)    | 179.8(2)    | N(1)-P(2)-C(26)-C(27)       | 2.82(19)    |
| C(8)-C(9)-C(10)-C(11)   | -0.3(4)     | C(1)-P(2)-C(26)-C(27)       | 122.70(17)  |
| C(9)-C(10)-C(11)-C(12)  | 1.0(4)      | C(32)-P(2)-C(26)-C(27)      | -115.0(3)   |
| C(10)-C(11)-C(12)-C(13) | -0.5(5)     | C(32A)-P(2)-C(26)-C(27)     | -126.2(3)   |
| C(11)-C(12)-C(13)-C(8)  | -0.7(4)     | Zn(1)-P(2)-C(26)-C(27)      | 49.52(19)   |
| N(2)-C(8)-C(13)-C(12)   | -179.4(2)   | N(1)-P(2)-C(26)-C(31)       | -171.30(15) |
| C(9)-C(8)-C(13)-C(12)   | 1.5(3)      | C(1)-P(2)-C(26)-C(31)       | -51.43(18)  |
| N(2)-P(1)-C(14)-C(15)   | -50.7(5)    | C(32)-P(2)-C(26)-C(31)      | 70.8(3)     |
| C(1)-P(1)-C(14)-C(15)   | 63.5(5)     | C(32A)-P(2)-C(26)-C(31)     | 59.7(3)     |
| Zn(1)-P(2)-C(26)-C(31)  | -124.61(14) | C(34A)-C(35A)-C(36A)-C(37A) | 0.4(9)      |
| C(31)-C(26)-C(27)-C(28) | -1.0(3)     | C(33A)-C(32A)-C(37A)-C(36A) | -1.4(9)     |
| P(2)-C(26)-C(27)-C(28)  | -175.12(16) | P(2)-C(32A)-C(37A)-C(36A)   | -175.4(6)   |
| C(26)-C(27)-C(28)-C(29) | 1.1(3)      | C(35A)-C(36A)-C(37A)-C(32A) | 0.8(10)     |
| C(27)-C(28)-C(29)-C(30) | -0.6(3)     | C(6S)-C(1S)-C(2S)-C(3S)     | 0.7         |
| C(28)-C(29)-C(30)-C(31) | 0.1(3)      | C(1S)-C(2S)-C(3S)-C(4S)     | -0.7        |
| C(29)-C(30)-C(31)-C(26) | -0.1(3)     | C(2S)-C(3S)-C(4S)-C(5S)     | -0.2        |
| C(27)-C(26)-C(31)-C(30) | 0.5(3)      | C(3S)-C(4S)-C(5S)-C(6S)     | 0.9         |
| P(2)-C(26)-C(31)-C(30)  | 174.74(16)  | C(4S)-C(5S)-C(6S)-C(1S)     | -0.8        |
| N(1)-P(2)-C(32)-C(33)   | -116.0(4)   | C(2S)-C(1S)-C(6S)-C(5S)     | 0.0         |
| C(1)-P(2)-C(32)-C(33)   | 128.0(4)    | C(6X)-C(1X)-C(2X)-C(3X)     | 0.4         |
| C(26)-P(2)-C(32)-C(33)  | 4.6(5)      | C(1X)-C(2X)-C(3X)-C(4X)     | -0.7        |
| C(32A)-P(2)-C(32)-C(33) | 77(3)       | C(2X)-C(3X)-C(4X)-C(5X)     | 0.8         |
| Zn(1)-P(2)-C(32)-C(33)  | -161.2(3)   | C(3X)-C(4X)-C(5X)-C(6X)     | -0.6        |
| N(1)-P(2)-C(32)-C(37)   | 64.2(5)     | C(2X)-C(1X)-C(6X)-C(5X)     | -0.2        |
| C(1)-P(2)-C(32)-C(37)   | -51.8(5)    | C(4X)-C(5X)-C(6X)-C(1X)     | 0.3         |
| C(26)-P(2)-C(32)-C(37)  | -175.2(4)   | C(6T)-C(1T)-C(2T)-C(5T)#2   | -172(7)     |
| C(32A)-P(2)-C(32)-C(37) | -102(4)     | C(7T)-C(1T)-C(2T)-C(5T)#2   | 8(7)        |
| Zn(1)-P(2)-C(32)-C(37)  | 19.0(6)     | C(6T)#2-C(1T)-C(2T)-C(5T)#2 | -171(7)     |
| C(37)-C(32)-C(33)-C(34) | 0.5(4)      | C(3T)#2-C(1T)-C(2T)-C(5T)#2 | -171(8)     |
| P(2)-C(32)-C(33)-C(34)  | -179.3(5)   | C(5T)#2-C(1T)-C(2T)-C(6T)#2 | 171(7)      |
| C(32)-C(33)-C(34)-C(35) | 0.0(4)      | C(6T)-C(1T)-C(2T)-C(6T)#2   | -0.7(8)     |

|                             |            |                             |            |
|-----------------------------|------------|-----------------------------|------------|
| C(33)-C(34)-C(35)-C(36)     | -0.1(8)    | C(7T)-C(1T)-C(2T)-C(6T)#2   | 179.0(8)   |
| C(34)-C(35)-C(36)-C(37)     | -0.3(10)   | C(3T)#2-C(1T)-C(2T)-C(6T)#2 | 0.3(17)    |
| C(35)-C(36)-C(37)-C(32)     | 0.7(11)    | C(5T)#2-C(1T)-C(2T)-C(3T)   | 172(7)     |
| C(33)-C(32)-C(37)-C(36)     | -0.8(9)    | C(6T)-C(1T)-C(2T)-C(3T)     | 0.2        |
| P(2)-C(32)-C(37)-C(36)      | 178.9(6)   | C(7T)-C(1T)-C(2T)-C(3T)     | 179.9      |
| N(1)-P(2)-C(32A)-C(37A)     | 58.8(6)    | C(6T)#2-C(1T)-C(2T)-C(3T)   | 0.9(8)     |
| C(1)-P(2)-C(32A)-C(37A)     | -58.6(5)   | C(3T)#2-C(1T)-C(2T)-C(3T)   | 1.1(17)    |
| C(32)-P(2)-C(32A)-C(37A)    | 73(3)      | C(5T)#2-C(2T)-C(3T)-C(6T)#2 | 0.2(9)     |
| C(26)-P(2)-C(32A)-C(37A)    | -176.2(4)  | C(1T)-C(2T)-C(3T)-C(6T)#2   | -1.3(12)   |
| Zn(1)-P(2)-C(32A)-C(37A)    | 8.0(6)     | C(5T)#2-C(2T)-C(3T)-C(4T)   | 1.3(13)    |
| N(1)-P(2)-C(32A)-C(33A)     | -114.9(4)  | C(6T)#2-C(2T)-C(3T)-C(4T)   | 1.1(12)    |
| C(1)-P(2)-C(32A)-C(33A)     | 127.7(4)   | C(1T)-C(2T)-C(3T)-C(4T)     | -0.2       |
| C(32)-P(2)-C(32A)-C(33A)    | -100(4)    | C(5T)#2-C(2T)-C(3T)-C(1T)#2 | 0.9(10)    |
| C(26)-P(2)-C(32A)-C(33A)    | 10.2(4)    | C(6T)#2-C(2T)-C(3T)-C(1T)#2 | 0.7(9)     |
| Zn(1)-P(2)-C(32A)-C(33A)    | -165.6(3)  | C(1T)-C(2T)-C(3T)-C(1T)#2   | -0.6(5)    |
| C(37A)-C(32A)-C(33A)-C(34A) | 0.8(4)     | C(6T)#2-C(3T)-C(4T)-C(1T)#2 | 0.0(7)     |
| P(2)-C(32A)-C(33A)-C(34A)   | 174.2(5)   | C(2T)-C(3T)-C(4T)-C(1T)#2   | -0.9(12)   |
| C(32A)-C(33A)-C(34A)-C(35A) | 0.5(4)     | C(6T)#2-C(3T)-C(4T)-C(7T)#2 | -178(5)    |
| C(33A)-C(34A)-C(35A)-C(36A) | -1.1(7)    | C(2T)-C(3T)-C(4T)-C(7T)#2   | -179(4)    |
| C(1T)#2-C(3T)-C(4T)-C(7T)#2 | -178(5)    | C(5T)#2-C(1T)-C(6T)-C(1T)#2 | -3(2)      |
| C(2T)-C(3T)-C(4T)-C(6T)#2   | -0.9(10)   | C(4T)#2-C(1T)-C(6T)-C(1T)#2 | -178(2)    |
| C(1T)#2-C(3T)-C(4T)-C(6T)#2 | 0.0(7)     | C(2T)-C(1T)-C(6T)-C(1T)#2   | 0.5(6)     |
| C(6T)#2-C(3T)-C(4T)-C(5T)   | 1.3(10)    | C(7T)-C(1T)-C(6T)-C(1T)#2   | -179.2(6)  |
| C(2T)-C(3T)-C(4T)-C(5T)     | 0.4        | C(6T)#2-C(1T)-C(6T)-C(1T)#2 | 0.0(4)     |
| C(1T)#2-C(3T)-C(4T)-C(5T)   | 1.3(12)    | C(3T)#2-C(1T)-C(6T)-C(1T)#2 | -178(3)    |
| C(7T)#2-C(4T)-C(5T)-C(1T)#2 | 172(8)     | C(4T)#2-C(1T)-C(6T)-C(5T)#2 | -176(4)    |
| C(6T)#2-C(4T)-C(5T)-C(1T)#2 | -7(6)      | C(2T)-C(1T)-C(6T)-C(5T)#2   | 3(3)       |
| C(3T)-C(4T)-C(5T)-C(1T)#2   | -8(7)      | C(7T)-C(1T)-C(6T)-C(5T)#2   | -176(3)    |
| C(1T)#2-C(4T)-C(5T)-C(6T)   | 7(7)       | C(6T)#2-C(1T)-C(6T)-C(5T)#2 | 3(2)       |
| C(7T)#2-C(4T)-C(5T)-C(6T)   | 179.1(15)  | C(3T)#2-C(1T)-C(6T)-C(5T)#2 | -176(4)    |
| C(6T)#2-C(4T)-C(5T)-C(6T)   | 0.3(7)     | C(5T)#2-C(1T)-C(6T)-C(6T)#2 | -3(2)      |
| C(3T)-C(4T)-C(5T)-C(6T)     | -0.5       | C(4T)#2-C(1T)-C(6T)-C(6T)#2 | -178.4(19) |
| C(1T)#2-C(4T)-C(5T)-C(7T)#2 | -172(8)    | C(2T)-C(1T)-C(6T)-C(6T)#2   | 0.5(6)     |
| C(6T)#2-C(4T)-C(5T)-C(7T)#2 | -179(2)    | C(7T)-C(1T)-C(6T)-C(6T)#2   | -179.2(6)  |
| C(3T)-C(4T)-C(5T)-C(7T)#2   | -179.6(15) | C(3T)#2-C(1T)-C(6T)-C(6T)#2 | -178(2)    |
| C(1T)#2-C(4T)-C(5T)-C(6T)#2 | 7(6)       | C(1T)#2-C(5T)-C(6T)-C(3T)#2 | -176(4)    |
| C(7T)#2-C(4T)-C(5T)-C(6T)#2 | 179(2)     | C(2T)#2-C(5T)-C(6T)-C(3T)#2 | -0.2(9)    |
| C(3T)-C(4T)-C(5T)-C(6T)#2   | -0.8(7)    | C(4T)-C(5T)-C(6T)-C(3T)#2   | -179(3)    |
| C(5T)#2-C(1T)-C(6T)-C(3T)#2 | 176(4)     | C(7T)#2-C(5T)-C(6T)-C(3T)#2 | -176(5)    |
| C(4T)#2-C(1T)-C(6T)-C(3T)#2 | 0.0(10)    | C(6T)#2-C(5T)-C(6T)-C(3T)#2 | -178(3)    |
| C(2T)-C(1T)-C(6T)-C(3T)#2   | 179(2)     | C(1T)#2-C(5T)-C(6T)-C(2T)#2 | -176(4)    |

|                             |            |                             |          |
|-----------------------------|------------|-----------------------------|----------|
| C(7T)-C(1T)-C(6T)-C(3T)#2   | -1(2)      | C(4T)-C(5T)-C(6T)-C(2T)#2   | -178(2)  |
| C(6T)#2-C(1T)-C(6T)-C(3T)#2 | 178(2)     | C(7T)#2-C(5T)-C(6T)-C(2T)#2 | -176(6)  |
| C(5T)#2-C(1T)-C(6T)-C(2T)#2 | -1(5)      | C(6T)#2-C(5T)-C(6T)-C(2T)#2 | -178(3)  |
| C(4T)#2-C(1T)-C(6T)-C(2T)#2 | -177(6)    | C(1T)#2-C(5T)-C(6T)-C(4T)#2 | 1.2(17)  |
| C(2T)-C(1T)-C(6T)-C(2T)#2   | 2(5)       | C(2T)#2-C(5T)-C(6T)-C(4T)#2 | 178(5)   |
| C(7T)-C(1T)-C(6T)-C(2T)#2   | -178(5)    | C(4T)-C(5T)-C(6T)-C(4T)#2   | -1(3)    |
| C(6T)#2-C(1T)-C(6T)-C(2T)#2 | 2(5)       | C(7T)#2-C(5T)-C(6T)-C(4T)#2 | 1(4)     |
| C(3T)#2-C(1T)-C(6T)-C(2T)#2 | -177(7)    | C(6T)#2-C(5T)-C(6T)-C(4T)#2 | -1(3)    |
| C(5T)#2-C(1T)-C(6T)-C(4T)#2 | 176(4)     | C(1T)#2-C(5T)-C(6T)-C(1T)   | 3(2)     |
| C(2T)-C(1T)-C(6T)-C(4T)#2   | 178.9(16)  | C(2T)#2-C(5T)-C(6T)-C(1T)   | 179(2)   |
| C(7T)-C(1T)-C(6T)-C(4T)#2   | -0.8(16)   | C(4T)-C(5T)-C(6T)-C(1T)     | 0.5      |
| C(6T)#2-C(1T)-C(6T)-C(4T)#2 | 178.4(19)  | C(7T)#2-C(5T)-C(6T)-C(1T)   | 3(4)     |
| C(3T)#2-C(1T)-C(6T)-C(4T)#2 | 0.0(10)    | C(6T)#2-C(5T)-C(6T)-C(1T)   | 0.7(5)   |
| C(5T)#2-C(1T)-C(6T)-C(5T)   | -4(3)      | C(2T)#2-C(5T)-C(6T)-C(1T)#2 | 176(4)   |
| C(4T)#2-C(1T)-C(6T)-C(5T)   | -179.2(16) | C(4T)-C(5T)-C(6T)-C(1T)#2   | -2(2)    |
| C(2T)-C(1T)-C(6T)-C(5T)     | -0.3       | C(7T)#2-C(5T)-C(6T)-C(1T)#2 | 0(3)     |
| C(7T)-C(1T)-C(6T)-C(5T)     | 180.0      | C(6T)#2-C(5T)-C(6T)-C(1T)#2 | -1.8(16) |
| C(6T)#2-C(1T)-C(6T)-C(5T)   | -0.8(6)    | C(1T)#2-C(5T)-C(6T)-C(5T)#2 | 1.8(17)  |
| C(3T)#2-C(1T)-C(6T)-C(5T)   | -179(2)    | C(2T)#2-C(5T)-C(6T)-C(5T)#2 | 178(3)   |
| C(4T)-C(5T)-C(6T)-C(5T)#2   | -0.2(6)    | C(7U)-C(1U)-C(2U)-C(3U)     | -179.9   |
| C(7T)#2-C(5T)-C(6T)-C(5T)#2 | 2(4)       | C(1U)-C(2U)-C(3U)-C(4U)     | -0.1     |
| C(6T)#2-C(5T)-C(6T)-C(5T)#2 | 0.0(4)     | C(2U)-C(3U)-C(4U)-C(5U)     | 0.3      |
| C(1T)#2-C(5T)-C(6T)-C(6T)#2 | 1.8(16)    | C(3U)-C(4U)-C(5U)-C(6U)     | -0.4     |
| C(2T)#2-C(5T)-C(6T)-C(6T)#2 | 178(3)     | C(4U)-C(5U)-C(6U)-C(1U)     | 0.4      |
| C(4T)-C(5T)-C(6T)-C(6T)#2   | -0.2(5)    | C(2U)-C(1U)-C(6U)-C(5U)     | -0.2     |
| C(7T)#2-C(5T)-C(6T)-C(6T)#2 | 2(3)       | C(7U)-C(1U)-C(6U)-C(5U)     | 179.8    |
| C(5T)#2-C(1T)-C(7T)-C(4T)#2 | -177(4)    | C(6V)-C(1V)-C(2V)-C(3V)     | 0.0      |
| C(6T)-C(1T)-C(7T)-C(4T)#2   | 0.9(19)    | C(7V)-C(1V)-C(2V)-C(3V)     | 179.6    |
| C(2T)-C(1T)-C(7T)-C(4T)#2   | -178.8(19) | C(1V)-C(2V)-C(3V)-C(4V)     | 0.1      |
| C(6T)#2-C(1T)-C(7T)-C(4T)#2 | -177(3)    | C(2V)-C(3V)-C(4V)-C(5V)     | -0.4     |
| C(3T)#2-C(1T)-C(7T)-C(4T)#2 | 0.5(11)    | C(3V)-C(4V)-C(5V)-C(6V)     | 0.6      |
| C(4T)#2-C(1T)-C(7T)-C(5T)#2 | 177(4)     | C(4V)-C(5V)-C(6V)-C(1V)     | -0.5     |
| C(6T)-C(1T)-C(7T)-C(5T)#2   | 177.5(19)  | C(2V)-C(1V)-C(6V)-C(5V)     | 0.2      |
| C(2T)-C(1T)-C(7T)-C(5T)#2   | -2.2(19)   | C(7V)-C(1V)-C(6V)-C(5V)     | -179.4   |
| C(6T)#2-C(1T)-C(7T)-C(5T)#2 | -0.2(13)   |                             |          |
| C(3T)#2-C(1T)-C(7T)-C(5T)#2 | 177(3)     |                             |          |
| C(6U)-C(1U)-C(2U)-C(3U)     | 0.1        |                             |          |

Symmetry transformations used to generate equivalent atoms: #1 -x,y,-z+1/2 #2 -x+1/2,-y+3/2,-z+1

X-Ray Crystal Structure of **1**

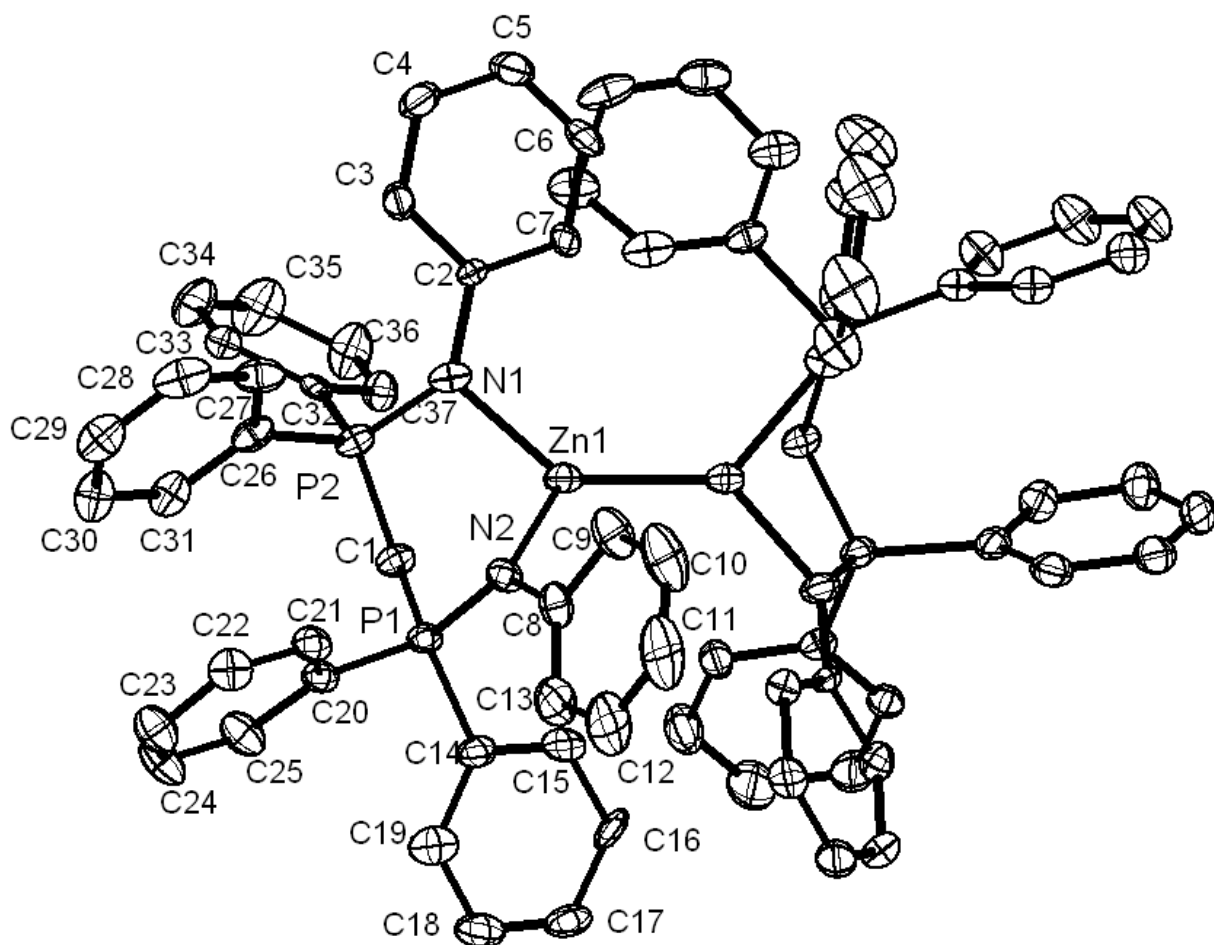



Table 1. Crystal data and structure refinement for **3**.

|                                   |                                                                                                                                    |
|-----------------------------------|------------------------------------------------------------------------------------------------------------------------------------|
| Empirical formula                 | C74 H85 N2 P2 Zn2                                                                                                                  |
| Formula weight                    | 1195.12                                                                                                                            |
| Temperature                       | 100(2) K                                                                                                                           |
| Wavelength                        | 0.71073 Å                                                                                                                          |
| Crystal system, space group       | Triclinic, P-1                                                                                                                     |
| Unit cell dimensions              | a = 12.6320(4) Å alpha = 73.9330(10) deg.<br>b = 13.5140(5) Å beta = 89.0060(10) deg.<br>c = 21.8795(7) Å gamma = 64.2620(10) deg. |
| Volume                            | 3210.15(19) Å <sup>3</sup>                                                                                                         |
| Z, Calculated density             | 2, 1.236 Mg/m <sup>3</sup>                                                                                                         |
| Absorption coefficient            | 0.840 mm <sup>-1</sup>                                                                                                             |
| F(000)                            | 1266                                                                                                                               |
| Crystal size                      | 0.21 x 0.16 x 0.13 mm                                                                                                              |
| Theta range for data collection   | 0.98 to 30.70 deg.                                                                                                                 |
| Limiting indices                  | -18<=h<=18, -19<=k<=19, -31<=l<=31                                                                                                 |
| Reflections collected / unique    | 75343 / 19793 [R(int) = 0.0306]                                                                                                    |
| Completeness to theta = 30.70     | 99.3 %                                                                                                                             |
| Absorption correction             | Semi-empirical from equivalents                                                                                                    |
| Max. and min. transmission        | 0.8986 and 0.8433                                                                                                                  |
| Refinement method                 | Full-matrix least-squares on F <sup>2</sup>                                                                                        |
| Data / restraints / parameters    | 19793 / 27 / 806                                                                                                                   |
| Goodness-of-fit on F <sup>2</sup> | 1.017                                                                                                                              |
| Final R indices [I>2sigma(I)]     | R1 = 0.0320, wR2 = 0.0776                                                                                                          |
| R indices (all data)              | R1 = 0.0458, wR2 = 0.0846                                                                                                          |
| Largest diff. peak and hole       | 0.556 and -0.317 e. Å <sup>-3</sup>                                                                                                |

The complex molecule is located on 2-fold axis of symmetry. In its asymmetric part the moiety exhibits some disorder in the phenyl rings. The disorder was refined as splitting 3 out of 6 phenyl rings into two fragments with the equal occupancies at the 50% level each. These fragments were constraint to have proper geometry and refined as a rigid bodies with ADPs for non-H atoms. All hydrogen atoms in the phenyl rings of the complex molecule were located geometrically and their positions were refined using riding model. Their isotropic thermal parameters were set to be either 1.2 or 1.5 times bigger than  $U_{eq}$  of corresponding carbon atoms. The coordinates and isotropic thermal parameter of H(1) atom were free for refinement. The asymmetric part of the unit cell contains one and a half of toluene molecules, severely disordered. All these moieties were refined with series of constraints for distances and angles providing reasonable geometries.

Table 2. Atomic coordinates ( $\times 10^4$ ) and equivalent isotropic displacement parameters ( $\text{\AA}^2 \times 10^3$ ) for **3**.  $U(\text{eq})$  is defined as one third of the trace of the orthogonalized  $U_{ij}$  tensor.

|       | x       | y       | z       | U(eq) |
|-------|---------|---------|---------|-------|
| Zn(1) | 1741(1) | 4435(1) | 7502(1) | 12(1) |
| Zn(2) | -264(1) | 4903(1) | 7487(1) | 17(1) |
| P(1)  | 4303(1) | 2886(1) | 8359(1) | 11(1) |
| P(2)  | 3960(1) | 4756(1) | 7095(1) | 12(1) |
| N(1)  | 2868(1) | 3401(1) | 8286(1) | 12(1) |
| N(2)  | 2634(1) | 4993(1) | 6859(1) | 13(1) |
| C(1)  | 4751(1) | 3465(1) | 7672(1) | 14(1) |
| C(2)  | 4836(1) | 4797(1) | 6438(1) | 14(1) |
| C(3)  | 5582(1) | 3784(1) | 6299(1) | 18(1) |
| C(4)  | 6225(1) | 3829(1) | 5778(1) | 21(1) |
| C(5)  | 6125(1) | 4879(1) | 5391(1) | 23(1) |
| C(6)  | 5384(1) | 5884(1) | 5526(1) | 23(1) |
| C(7)  | 4734(1) | 5851(1) | 6044(1) | 19(1) |
| C(8)  | 3853(1) | 5927(1) | 7395(1) | 14(1) |
| C(9)  | 4887(1) | 6027(1) | 7513(1) | 18(1) |
| C(10) | 4847(1) | 6858(1) | 7783(1) | 22(1) |
| C(11) | 3786(2) | 7586(1) | 7949(1) | 25(1) |
| C(12) | 2762(1) | 7493(1) | 7837(1) | 23(1) |
| C(13) | 2793(1) | 6670(1) | 7557(1) | 17(1) |
| C(14) | 2186(1) | 5188(1) | 6215(1) | 14(1) |
| C(15) | 1553(1) | 6327(1) | 5805(1) | 17(1) |
| C(16) | 994(1)  | 6502(1) | 5212(1) | 21(1) |
| C(17) | 1037(1) | 5589(1) | 5023(1) | 22(1) |
| C(18) | 1676(1) | 4477(1) | 5419(1) | 21(1) |
| C(19) | 2269(1) | 4255(1) | 6012(1) | 17(1) |
| C(20) | 1413(1) | 7344(1) | 6020(1) | 21(1) |
| C(21) | 1336(2) | 8375(1) | 5473(1) | 36(1) |
| C(22) | 329(1)  | 7705(1) | 6386(1) | 29(1) |
| C(23) | 2962(1) | 3011(1) | 6421(1) | 21(1) |
| C(24) | 3873(1) | 2271(1) | 6061(1) | 26(1) |
| C(25) | 2125(2) | 2479(1) | 6675(1) | 29(1) |
| C(26) | 2231(1) | 3232(1) | 8826(1) | 13(1) |
| C(27) | 1936(1) | 2304(1) | 8979(1) | 15(1) |
| C(28) | 1265(1) | 2190(1) | 9485(1) | 20(1) |
| C(29) | 899(1)  | 2958(1) | 9840(1) | 22(1) |
| C(30) | 1170(1) | 3881(1) | 9678(1) | 21(1) |
| C(31) | 1804(1) | 4057(1) | 9164(1) | 16(1) |
| C(32) | 2304(1) | 1431(1) | 8610(1) | 17(1) |
| C(33) | 3102(1) | 209(1)  | 9045(1) | 24(1) |

|       |          |           |          |       |
|-------|----------|-----------|----------|-------|
| C(34) | 1231(1)  | 1438(1)   | 8284(1)  | 23(1) |
| C(35) | 1936(1)  | 5164(1)   | 8960(1)  | 18(1) |
| C(36) | 2372(1)  | 5429(1)   | 9518(1)  | 25(1) |
| C(37) | 749(1)   | 6183(1)   | 8628(1)  | 22(1) |
| C(38) | 5112(1)  | 1332(1)   | 8487(1)  | 16(1) |
| C(39) | 4907(1)  | 921(1)    | 8002(1)  | 19(1) |
| C(40) | 5478(1)  | -241(1)   | 8055(1)  | 25(1) |
| C(41) | 6282(2)  | -1012(1)  | 8590(1)  | 30(1) |
| C(42) | 6515(1)  | -619(1)   | 9066(1)  | 28(1) |
| C(43) | 5932(1)  | 553(1)    | 9016(1)  | 21(1) |
| C(44) | 4796(1)  | 3058(1)   | 9084(1)  | 14(1) |
| C(45) | 4617(1)  | 2512(1)   | 9694(1)  | 16(1) |
| C(46) | 5018(1)  | 2659(1)   | 10235(1) | 19(1) |
| C(47) | 5599(1)  | 3340(1)   | 10176(1) | 21(1) |
| C(48) | 5774(1)  | 3889(1)   | 9573(1)  | 21(1) |
| C(49) | 5372(1)  | 3749(1)   | 9029(1)  | 17(1) |
| C(50) | -1856(1) | 4703(1)   | 7180(1)  | 21(1) |
| C(51) | -1802(1) | 4528(1)   | 7854(1)  | 21(1) |
| C(52) | -1965(1) | 5568(1)   | 7968(1)  | 22(1) |
| C(53) | -2128(1) | 6396(1)   | 7362(1)  | 21(1) |
| C(54) | -2063(1) | 5859(1)   | 6877(1)  | 20(1) |
| C(55) | -1744(2) | 3824(2)   | 6855(1)  | 33(1) |
| C(56) | -1708(1) | 3467(2)   | 8357(1)  | 31(1) |
| C(57) | -2009(1) | 5748(2)   | 8619(1)  | 31(1) |
| C(58) | -2380(2) | 7630(1)   | 7248(1)  | 31(1) |
| C(59) | -2198(2) | 6431(2)   | 6164(1)  | 29(1) |
| C(1A) | 8020(2)  | 486(2)    | 7531(1)  | 51(1) |
| C(2A) | 9084(2)  | 547(2)    | 7561(1)  | 51(1) |
| C(3A) | 9631(2)  | 687(2)    | 7013(1)  | 42(1) |
| C(4A) | 9123(2)  | 754(2)    | 6443(1)  | 37(1) |
| C(5A) | 8072(2)  | 676(2)    | 6417(1)  | 39(1) |
| C(6A) | 7523(2)  | 535(2)    | 6963(1)  | 43(1) |
| C(1B) | 4265(12) | -1233(11) | 5894(6)  | 58(4) |
| C(2B) | 4180(11) | -750(11)  | 5249(6)  | 59(3) |
| C(3B) | 3261(10) | 239(10)   | 4871(4)  | 44(2) |
| C(4B) | 2351(2)  | 801(2)    | 5182(1)  | 46(1) |
| C(5B) | 2423(9)  | 337(9)    | 5830(4)  | 52(3) |
| C(6B) | 3336(12) | -671(11)  | 6207(7)  | 49(3) |
| C(1D) | 4028(11) | -1085(9)  | 6045(5)  | 47(3) |
| C(2D) | 4286(13) | -916(13)  | 5423(5)  | 57(3) |
| C(3D) | 3392(10) | 68(12)    | 5015(4)  | 50(3) |
| C(4D) | 2351(2)  | 801(2)    | 5182(1)  | 46(1) |

|       |          |          |          |        |
|-------|----------|----------|----------|--------|
| C(5D) | 2127(9)  | 570(9)   | 5811(3)  | 33(2)  |
| C(6D) | 3008(13) | -377(12) | 6233(7)  | 51(3)  |
| C(1C) | 10845(9) | -514(10) | 10408(4) | 81(5)  |
| C(2C) | 9793(10) | 461(8)   | 10359(4) | 84(3)  |
| C(3C) | 8943(9)  | 871(8)   | 9845(5)  | 59(2)  |
| C(4C) | 9138(8)  | 297(10)  | 9386(5)  | 63(3)  |
| C(5C) | 10159(8) | -702(7)  | 9452(4)  | 85(3)  |
| C(6C) | 11007(9) | -1114(8) | 9965(5)  | 102(5) |

Table 3. Bond lengths [ $\text{\AA}$ ] and angles [deg] for **3**.

|             |            |              |            |
|-------------|------------|--------------|------------|
| Zn(1)-N(2)  | 1.9794(11) | C(11)-C(12)  | 1.385(2)   |
| Zn(1)-N(1)  | 1.9886(10) | C(11)-H(11)  | 0.9500     |
| Zn(1)-Zn(2) | 2.3272(2)  | C(12)-C(13)  | 1.3975(19) |
| Zn(2)-C(50) | 2.2786(14) | C(12)-H(12)  | 0.9500     |
| Zn(2)-C(54) | 2.2839(13) | C(13)-H(13)  | 0.9500     |
| Zn(2)-C(51) | 2.2918(14) | C(14)-C(19)  | 1.4114(18) |
| Zn(2)-C(53) | 2.2987(14) | C(14)-C(15)  | 1.4154(18) |
| Zn(2)-C(52) | 2.3018(14) | C(15)-C(16)  | 1.3986(18) |
| P(1)-N(1)   | 1.6277(11) | C(15)-C(20)  | 1.5122(19) |
| P(1)-C(1)   | 1.7018(13) | C(16)-C(17)  | 1.386(2)   |
| P(1)-C(44)  | 1.8235(13) | C(16)-H(16)  | 0.9500     |
| P(1)-C(38)  | 1.8307(13) | C(17)-C(18)  | 1.382(2)   |
| P(2)-N(2)   | 1.6266(11) | C(17)-H(17)  | 0.9500     |
| P(2)-C(1)   | 1.7163(13) | C(18)-C(19)  | 1.3984(18) |
| P(2)-C(2)   | 1.8043(13) | C(18)-H(18)  | 0.9500     |
| P(2)-C(8)   | 1.8272(13) | C(19)-C(23)  | 1.5203(19) |
| N(1)-C(26)  | 1.4385(16) | C(20)-C(21)  | 1.532(2)   |
| N(2)-C(14)  | 1.4376(16) | C(20)-C(22)  | 1.534(2)   |
| C(1)-H(1)   | 0.9500     | C(20)-H(20)  | 1.0000     |
| C(2)-C(3)   | 1.3971(19) | C(21)-H(21A) | 0.9800     |
| C(2)-C(7)   | 1.3980(18) | C(21)-H(21B) | 0.9800     |
| C(3)-C(4)   | 1.3911(19) | C(21)-H(21C) | 0.9800     |
| C(3)-H(3)   | 0.9500     | C(22)-H(22A) | 0.9800     |
| C(4)-C(5)   | 1.388(2)   | C(22)-H(22B) | 0.9800     |
| C(4)-H(4)   | 0.9500     | C(22)-H(22C) | 0.9800     |
| C(5)-C(6)   | 1.384(2)   | C(23)-C(24)  | 1.534(2)   |
| C(5)-H(5)   | 0.9500     | C(23)-C(25)  | 1.536(2)   |
| C(6)-C(7)   | 1.3901(19) | C(23)-H(23)  | 1.0000     |
| C(6)-H(6)   | 0.9500     | C(24)-H(24A) | 0.9800     |
| C(7)-H(7)   | 0.9500     | C(24)-H(24B) | 0.9800     |

|              |            |              |            |
|--------------|------------|--------------|------------|
| C(8)-C(13)   | 1.3925(19) | C(24)-H(24C) | 0.9800     |
| C(8)-C(9)    | 1.4050(18) | C(25)-H(25A) | 0.9800     |
| C(9)-C(10)   | 1.3890(19) | C(25)-H(25B) | 0.9800     |
| C(9)-H(9)    | 0.9500     | C(25)-H(25C) | 0.9800     |
| C(10)-C(11)  | 1.389(2)   | C(26)-C(27)  | 1.4117(18) |
| C(10)-H(10)  | 0.9500     | C(26)-C(31)  | 1.4163(18) |
| C(27)-C(28)  | 1.3971(18) | C(42)-H(42)  | 0.9500     |
| C(27)-C(32)  | 1.5159(18) | C(43)-H(43)  | 0.9500     |
| C(28)-C(29)  | 1.383(2)   | C(44)-C(49)  | 1.3932(18) |
| C(28)-H(28)  | 0.9500     | C(44)-C(45)  | 1.4031(18) |
| C(29)-C(30)  | 1.386(2)   | C(45)-C(46)  | 1.3907(18) |
| C(29)-H(29)  | 0.9500     | C(45)-H(45)  | 0.9500     |
| C(30)-C(31)  | 1.3957(19) | C(46)-C(47)  | 1.386(2)   |
| C(30)-H(30)  | 0.9500     | C(46)-H(46)  | 0.9500     |
| C(31)-C(35)  | 1.5205(19) | C(47)-C(48)  | 1.389(2)   |
| C(32)-C(34)  | 1.537(2)   | C(47)-H(47)  | 0.9500     |
| C(32)-C(33)  | 1.5380(19) | C(48)-C(49)  | 1.3930(18) |
| C(32)-H(32)  | 1.0000     | C(48)-H(48)  | 0.9500     |
| C(33)-H(33A) | 0.9800     | C(49)-H(49)  | 0.9500     |
| C(33)-H(33B) | 0.9800     | C(50)-C(54)  | 1.424(2)   |
| C(33)-H(33C) | 0.9800     | C(50)-C(51)  | 1.426(2)   |
| C(34)-H(34A) | 0.9800     | C(50)-C(55)  | 1.501(2)   |
| C(34)-H(34B) | 0.9800     | C(51)-C(52)  | 1.422(2)   |
| C(34)-H(34C) | 0.9800     | C(51)-C(56)  | 1.504(2)   |
| C(35)-C(36)  | 1.5336(19) | C(52)-C(53)  | 1.428(2)   |
| C(35)-C(37)  | 1.5381(19) | C(52)-C(57)  | 1.506(2)   |
| C(35)-H(35)  | 1.0000     | C(53)-C(54)  | 1.425(2)   |
| C(36)-H(36A) | 0.9800     | C(53)-C(58)  | 1.502(2)   |
| C(36)-H(36B) | 0.9800     | C(54)-C(59)  | 1.512(2)   |
| C(36)-H(36C) | 0.9800     | C(55)-H(55A) | 0.9800     |
| C(37)-H(37A) | 0.9800     | C(55)-H(55B) | 0.9800     |
| C(37)-H(37B) | 0.9800     | C(55)-H(55C) | 0.9800     |
| C(37)-H(37C) | 0.9800     | C(56)-H(56A) | 0.9800     |
| C(38)-C(43)  | 1.3940(19) | C(56)-H(56B) | 0.9800     |
| C(38)-C(39)  | 1.4008(19) | C(56)-H(56C) | 0.9800     |
| C(39)-C(40)  | 1.3845(19) | C(57)-H(57A) | 0.9800     |
| C(39)-H(39)  | 0.9500     | C(57)-H(57B) | 0.9800     |
| C(40)-C(41)  | 1.389(2)   | C(57)-H(57C) | 0.9800     |
| C(40)-H(40)  | 0.9500     | C(58)-H(58A) | 0.9800     |
| C(41)-C(42)  | 1.381(3)   | C(58)-H(58B) | 0.9800     |
| C(41)-H(41)  | 0.9500     | C(58)-H(58C) | 0.9800     |
| C(42)-C(43)  | 1.400(2)   | C(59)-H(59A) | 0.9800     |

|                 |           |                   |            |
|-----------------|-----------|-------------------|------------|
| C(59)-H(59B)    | 0.9800    | C(1C)-C(6C)       | 1.386(7)   |
| C(59)-H(59C)    | 0.9800    | C(1C)-H(1C)       | 0.9500     |
| C(1A)-C(6A)     | 1.375(3)  | C(2C)-C(3C)       | 1.381(7)   |
| C(1A)-C(2A)     | 1.386(3)  | C(2C)-H(2C)       | 0.9500     |
| C(1A)-H(1A1)    | 0.9500    | C(3C)-C(4C)       | 1.389(7)   |
| C(2A)-C(3A)     | 1.383(3)  | C(3C)-H(3C)       | 0.9500     |
| C(2A)-H(2A)     | 0.9500    | C(4C)-C(5C)       | 1.375(7)   |
| C(3A)-C(4A)     | 1.374(3)  | C(4C)-H(4C)       | 0.9500     |
| C(3A)-H(3A)     | 0.9500    | C(5C)-C(6C)       | 1.378(7)   |
| C(4A)-C(5A)     | 1.381(3)  | C(5C)-H(5C)       | 0.9500     |
| C(4A)-H(4A)     | 0.9500    | C(6C)-H(6C)       | 0.9500     |
| C(5A)-C(6A)     | 1.379(3)  | N(2)-Zn(1)-N(1)   | 107.47(4)  |
| C(5A)-H(5A)     | 0.9500    | N(2)-Zn(1)-Zn(2)  | 131.41(3)  |
| C(6A)-H(6A)     | 0.9500    | N(1)-Zn(1)-Zn(2)  | 120.91(3)  |
| C(1B)-C(2B)     | 1.365(8)  | C(50)-Zn(2)-C(54) | 36.39(5)   |
| C(1B)-C(6B)     | 1.383(8)  | C(50)-Zn(2)-C(51) | 36.35(5)   |
| C(1B)-H(1B1)    | 0.9500    | C(54)-Zn(2)-C(51) | 60.41(5)   |
| C(2B)-C(3B)     | 1.375(8)  | C(50)-Zn(2)-C(53) | 60.58(5)   |
| C(2B)-H(2B)     | 0.9500    | C(54)-Zn(2)-C(53) | 36.24(5)   |
| C(3B)-C(4B)     | 1.364(8)  | C(51)-Zn(2)-C(53) | 60.27(5)   |
| C(3B)-H(3B)     | 0.9500    | C(50)-Zn(2)-C(52) | 60.52(5)   |
| C(4B)-C(5B)     | 1.368(8)  | C(54)-Zn(2)-C(52) | 60.37(5)   |
| C(4B)-H(4B)     | 0.9500    | C(51)-Zn(2)-C(52) | 36.07(6)   |
| C(5B)-C(6B)     | 1.383(8)  | C(53)-Zn(2)-C(52) | 36.16(5)   |
| C(5B)-H(5B)     | 0.9500    | C(50)-Zn(2)-Zn(1) | 150.30(4)  |
| C(6B)-H(6B)     | 0.9500    | C(54)-Zn(2)-Zn(1) | 145.57(4)  |
| C(1D)-C(6D)     | 1.368(8)  | C(51)-Zn(2)-Zn(1) | 152.00(4)  |
| C(1D)-C(2D)     | 1.375(8)  | C(53)-Zn(2)-Zn(1) | 144.07(4)  |
| C(1D)-H(1D)     | 0.9500    | C(52)-Zn(2)-Zn(1) | 147.71(4)  |
| C(2D)-C(3D)     | 1.384(8)  | N(1)-P(1)-C(1)    | 110.43(6)  |
| C(2D)-H(2D)     | 0.9500    | N(1)-P(1)-C(44)   | 109.05(6)  |
| C(3D)-H(3D)     | 0.9500    | C(1)-P(1)-C(44)   | 115.51(6)  |
| C(5D)-C(6D)     | 1.369(8)  | N(1)-P(1)-C(38)   | 115.06(6)  |
| C(5D)-H(5D)     | 0.9500    | C(1)-P(1)-C(38)   | 103.83(6)  |
| C(6D)-H(6D)     | 0.9500    | C(44)-P(1)-C(38)  | 102.87(6)  |
| C(1C)-C(2C)     | 1.385(7)  | N(2)-P(2)-C(1)    | 114.56(6)  |
| N(2)-P(2)-C(2)  | 111.60(6) | C(10)-C(9)-H(9)   | 119.8      |
| C(1)-P(2)-C(2)  | 106.99(6) | C(8)-C(9)-H(9)    | 119.8      |
| N(2)-P(2)-C(8)  | 108.92(6) | C(9)-C(10)-C(11)  | 120.25(13) |
| C(1)-P(2)-C(8)  | 109.31(6) | C(9)-C(10)-H(10)  | 119.9      |
| C(2)-P(2)-C(8)  | 105.01(6) | C(11)-C(10)-H(10) | 119.9      |
| C(26)-N(1)-P(1) | 122.33(8) | C(12)-C(11)-C(10) | 119.88(13) |

|                     |            |                   |            |
|---------------------|------------|-------------------|------------|
| C(26)-N(1)-Zn(1)    | 110.19(8)  | C(12)-C(11)-H(11) | 120.1      |
| P(1)-N(1)-Zn(1)     | 127.25(6)  | C(10)-C(11)-H(11) | 120.1      |
| C(14)-N(2)-P(2)     | 126.02(9)  | C(11)-C(12)-C(13) | 120.20(14) |
| C(14)-N(2)-Zn(1)    | 112.18(8)  | C(11)-C(12)-H(12) | 119.9      |
| P(2)-N(2)-Zn(1)     | 118.01(6)  | C(13)-C(12)-H(12) | 119.9      |
| P(1)-C(1)-P(2)      | 128.02(8)  | C(8)-C(13)-C(12)  | 120.41(13) |
| P(1)-C(1)-H(1)      | 116.0      | C(8)-C(13)-H(13)  | 119.8      |
| P(2)-C(1)-H(1)      | 116.0      | C(12)-C(13)-H(13) | 119.8      |
| C(3)-C(2)-C(7)      | 119.35(12) | C(19)-C(14)-C(15) | 119.69(11) |
| C(3)-C(2)-P(2)      | 120.54(10) | C(19)-C(14)-N(2)  | 120.11(11) |
| C(7)-C(2)-P(2)      | 120.06(10) | C(15)-C(14)-N(2)  | 119.88(11) |
| C(4)-C(3)-C(2)      | 120.07(13) | C(16)-C(15)-C(14) | 118.90(13) |
| C(4)-C(3)-H(3)      | 120.0      | C(16)-C(15)-C(20) | 120.22(12) |
| C(2)-C(3)-H(3)      | 120.0      | C(14)-C(15)-C(20) | 120.76(11) |
| C(5)-C(4)-C(3)      | 120.28(14) | C(17)-C(16)-C(15) | 121.40(13) |
| C(5)-C(4)-H(4)      | 119.9      | C(17)-C(16)-H(16) | 119.3      |
| C(3)-C(4)-H(4)      | 119.9      | C(15)-C(16)-H(16) | 119.3      |
| C(6)-C(5)-C(4)      | 119.83(13) | C(18)-C(17)-C(16) | 119.45(12) |
| C(6)-C(5)-H(5)      | 120.1      | C(18)-C(17)-H(17) | 120.3      |
| C(4)-C(5)-H(5)      | 120.1      | C(16)-C(17)-H(17) | 120.3      |
| C(5)-C(6)-C(7)      | 120.45(13) | C(17)-C(18)-C(19) | 121.34(13) |
| C(5)-C(6)-H(6)      | 119.8      | C(17)-C(18)-H(18) | 119.3      |
| C(7)-C(6)-H(6)      | 119.8      | C(19)-C(18)-H(18) | 119.3      |
| C(6)-C(7)-C(2)      | 120.02(13) | C(18)-C(19)-C(14) | 119.15(13) |
| C(6)-C(7)-H(7)      | 120.0      | C(18)-C(19)-C(23) | 118.52(12) |
| C(2)-C(7)-H(7)      | 120.0      | C(14)-C(19)-C(23) | 122.32(11) |
| C(13)-C(8)-C(9)     | 118.90(12) | C(15)-C(20)-C(21) | 113.78(13) |
| C(13)-C(8)-P(2)     | 121.84(10) | C(15)-C(20)-C(22) | 109.88(12) |
| C(9)-C(8)-P(2)      | 119.09(10) | C(21)-C(20)-C(22) | 110.42(13) |
| C(10)-C(9)-C(8)     | 120.36(13) | C(15)-C(20)-H(20) | 107.5      |
| C(21)-C(20)-H(20)   | 107.5      | C(28)-C(27)-C(32) | 118.43(12) |
| C(22)-C(20)-H(20)   | 107.5      | C(26)-C(27)-C(32) | 122.54(11) |
| C(20)-C(21)-H(21A)  | 109.5      | C(29)-C(28)-C(27) | 121.32(13) |
| C(20)-C(21)-H(21B)  | 109.5      | C(29)-C(28)-H(28) | 119.3      |
| H(21A)-C(21)-H(21B) | 109.5      | C(27)-C(28)-H(28) | 119.3      |
| C(20)-C(21)-H(21C)  | 109.5      | C(28)-C(29)-C(30) | 119.37(13) |
| H(21A)-C(21)-H(21C) | 109.5      | C(28)-C(29)-H(29) | 120.3      |
| H(21B)-C(21)-H(21C) | 109.5      | C(30)-C(29)-H(29) | 120.3      |
| C(20)-C(22)-H(22A)  | 109.5      | C(29)-C(30)-C(31) | 121.65(13) |
| C(20)-C(22)-H(22B)  | 109.5      | C(29)-C(30)-H(30) | 119.2      |
| H(22A)-C(22)-H(22B) | 109.5      | C(31)-C(30)-H(30) | 119.2      |
| C(20)-C(22)-H(22C)  | 109.5      | C(30)-C(31)-C(26) | 118.56(12) |

|                     |            |                     |            |
|---------------------|------------|---------------------|------------|
| H(22A)-C(22)-H(22C) | 109.5      | C(30)-C(31)-C(35)   | 118.89(12) |
| H(22B)-C(22)-H(22C) | 109.5      | C(26)-C(31)-C(35)   | 122.41(11) |
| C(19)-C(23)-C(24)   | 112.32(12) | C(27)-C(32)-C(34)   | 112.06(11) |
| C(19)-C(23)-C(25)   | 110.95(13) | C(27)-C(32)-C(33)   | 111.41(11) |
| C(24)-C(23)-C(25)   | 110.04(12) | C(34)-C(32)-C(33)   | 109.55(11) |
| C(19)-C(23)-H(23)   | 107.8      | C(27)-C(32)-H(32)   | 107.9      |
| C(24)-C(23)-H(23)   | 107.8      | C(34)-C(32)-H(32)   | 107.9      |
| C(25)-C(23)-H(23)   | 107.8      | C(33)-C(32)-H(32)   | 107.9      |
| C(23)-C(24)-H(24A)  | 109.5      | C(32)-C(33)-H(33A)  | 109.5      |
| C(23)-C(24)-H(24B)  | 109.5      | C(32)-C(33)-H(33B)  | 109.5      |
| H(24A)-C(24)-H(24B) | 109.5      | H(33A)-C(33)-H(33B) | 109.5      |
| C(23)-C(24)-H(24C)  | 109.5      | C(32)-C(33)-H(33C)  | 109.5      |
| H(24A)-C(24)-H(24C) | 109.5      | H(33A)-C(33)-H(33C) | 109.5      |
| H(24B)-C(24)-H(24C) | 109.5      | H(33B)-C(33)-H(33C) | 109.5      |
| C(23)-C(25)-H(25A)  | 109.5      | C(32)-C(34)-H(34A)  | 109.5      |
| C(23)-C(25)-H(25B)  | 109.5      | C(32)-C(34)-H(34B)  | 109.5      |
| H(25A)-C(25)-H(25B) | 109.5      | H(34A)-C(34)-H(34B) | 109.5      |
| C(23)-C(25)-H(25C)  | 109.5      | C(32)-C(34)-H(34C)  | 109.5      |
| H(25A)-C(25)-H(25C) | 109.5      | H(34A)-C(34)-H(34C) | 109.5      |
| H(25B)-C(25)-H(25C) | 109.5      | H(34B)-C(34)-H(34C) | 109.5      |
| C(27)-C(26)-C(31)   | 119.92(11) | C(31)-C(35)-C(36)   | 113.41(12) |
| C(27)-C(26)-N(1)    | 119.98(11) | C(31)-C(35)-C(37)   | 109.93(11) |
| C(31)-C(26)-N(1)    | 119.84(11) | C(36)-C(35)-C(37)   | 109.05(11) |
| C(28)-C(27)-C(26)   | 119.02(12) | C(31)-C(35)-H(35)   | 108.1      |
| C(36)-C(35)-H(35)   | 108.1      | C(46)-C(45)-H(45)   | 120.0      |
| C(37)-C(35)-H(35)   | 108.1      | C(44)-C(45)-H(45)   | 120.0      |
| C(35)-C(36)-H(36A)  | 109.5      | C(47)-C(46)-C(45)   | 120.41(13) |
| C(35)-C(36)-H(36B)  | 109.5      | C(47)-C(46)-H(46)   | 119.8      |
| H(36A)-C(36)-H(36B) | 109.5      | C(45)-C(46)-H(46)   | 119.8      |
| C(35)-C(36)-H(36C)  | 109.5      | C(46)-C(47)-C(48)   | 119.95(12) |
| H(36A)-C(36)-H(36C) | 109.5      | C(46)-C(47)-H(47)   | 120.0      |
| H(36B)-C(36)-H(36C) | 109.5      | C(48)-C(47)-H(47)   | 120.0      |
| C(35)-C(37)-H(37A)  | 109.5      | C(47)-C(48)-C(49)   | 119.96(13) |
| C(35)-C(37)-H(37B)  | 109.5      | C(47)-C(48)-H(48)   | 120.0      |
| H(37A)-C(37)-H(37B) | 109.5      | C(49)-C(48)-H(48)   | 120.0      |
| C(35)-C(37)-H(37C)  | 109.5      | C(48)-C(49)-C(44)   | 120.54(12) |
| H(37A)-C(37)-H(37C) | 109.5      | C(48)-C(49)-H(49)   | 119.7      |
| H(37B)-C(37)-H(37C) | 109.5      | C(44)-C(49)-H(49)   | 119.7      |
| C(43)-C(38)-C(39)   | 118.66(12) | C(54)-C(50)-C(51)   | 107.73(13) |
| C(43)-C(38)-P(1)    | 124.73(11) | C(54)-C(50)-C(55)   | 126.73(14) |
| C(39)-C(38)-P(1)    | 116.57(10) | C(51)-C(50)-C(55)   | 125.52(14) |
| C(40)-C(39)-C(38)   | 120.85(14) | C(54)-C(50)-Zn(2)   | 72.01(8)   |



|                     |            |                     |            |
|---------------------|------------|---------------------|------------|
| C(40)-C(39)-H(39)   | 119.6      | C(51)-C(50)-Zn(2)   | 72.33(8)   |
| C(38)-C(39)-H(39)   | 119.6      | C(55)-C(50)-Zn(2)   | 122.36(11) |
| C(39)-C(40)-C(41)   | 119.95(15) | C(52)-C(51)-C(50)   | 108.28(13) |
| C(39)-C(40)-H(40)   | 120.0      | C(52)-C(51)-C(56)   | 125.40(14) |
| C(41)-C(40)-H(40)   | 120.0      | C(50)-C(51)-C(56)   | 126.08(15) |
| C(42)-C(41)-C(40)   | 120.06(14) | C(52)-C(51)-Zn(2)   | 72.35(8)   |
| C(42)-C(41)-H(41)   | 120.0      | C(50)-C(51)-Zn(2)   | 71.32(8)   |
| C(40)-C(41)-H(41)   | 120.0      | C(56)-C(51)-Zn(2)   | 126.58(10) |
| C(41)-C(42)-C(43)   | 120.17(14) | C(51)-C(52)-C(53)   | 107.93(13) |
| C(41)-C(42)-H(42)   | 119.9      | C(51)-C(52)-C(57)   | 124.62(14) |
| C(43)-C(42)-H(42)   | 119.9      | C(53)-C(52)-C(57)   | 127.40(15) |
| C(38)-C(43)-C(42)   | 120.28(14) | C(51)-C(52)-Zn(2)   | 71.58(8)   |
| C(38)-C(43)-H(43)   | 119.9      | C(53)-C(52)-Zn(2)   | 71.80(8)   |
| C(42)-C(43)-H(43)   | 119.9      | C(57)-C(52)-Zn(2)   | 124.44(10) |
| C(49)-C(44)-C(45)   | 119.11(12) | C(54)-C(53)-C(52)   | 107.84(13) |
| C(49)-C(44)-P(1)    | 118.91(10) | C(54)-C(53)-C(58)   | 125.58(13) |
| C(45)-C(44)-P(1)    | 121.98(10) | C(52)-C(53)-C(58)   | 126.52(14) |
| C(46)-C(45)-C(44)   | 120.02(12) | C(54)-C(53)-Zn(2)   | 71.32(8)   |
| C(52)-C(53)-Zn(2)   | 72.04(8)   | H(59A)-C(59)-H(59C) | 109.5      |
| C(58)-C(53)-Zn(2)   | 124.28(11) | H(59B)-C(59)-H(59C) | 109.5      |
| C(50)-C(54)-C(53)   | 108.22(12) | C(6A)-C(1A)-C(2A)   | 120.2(2)   |
| C(50)-C(54)-C(59)   | 126.34(14) | C(6A)-C(1A)-H(1A1)  | 119.9      |
| C(53)-C(54)-C(59)   | 125.43(14) | C(2A)-C(1A)-H(1A1)  | 119.9      |
| C(50)-C(54)-Zn(2)   | 71.60(8)   | C(3A)-C(2A)-C(1A)   | 119.7(2)   |
| C(53)-C(54)-Zn(2)   | 72.44(8)   | C(3A)-C(2A)-H(2A)   | 120.1      |
| C(59)-C(54)-Zn(2)   | 122.06(10) | C(1A)-C(2A)-H(2A)   | 120.1      |
| C(50)-C(55)-H(55A)  | 109.5      | C(4A)-C(3A)-C(2A)   | 119.9(2)   |
| C(50)-C(55)-H(55B)  | 109.5      | C(4A)-C(3A)-H(3A)   | 120.0      |
| H(55A)-C(55)-H(55B) | 109.5      | C(2A)-C(3A)-H(3A)   | 120.0      |
| C(50)-C(55)-H(55C)  | 109.5      | C(3A)-C(4A)-C(5A)   | 120.12(18) |
| H(55A)-C(55)-H(55C) | 109.5      | C(3A)-C(4A)-H(4A)   | 119.9      |
| H(55B)-C(55)-H(55C) | 109.5      | C(5A)-C(4A)-H(4A)   | 119.9      |
| C(51)-C(56)-H(56A)  | 109.5      | C(6A)-C(5A)-C(4A)   | 120.23(19) |
| C(51)-C(56)-H(56B)  | 109.5      | C(6A)-C(5A)-H(5A)   | 119.9      |
| H(56A)-C(56)-H(56B) | 109.5      | C(4A)-C(5A)-H(5A)   | 119.9      |
| C(51)-C(56)-H(56C)  | 109.5      | C(1A)-C(6A)-C(5A)   | 119.7(2)   |
| H(56A)-C(56)-H(56C) | 109.5      | C(1A)-C(6A)-H(6A)   | 120.1      |
| H(56B)-C(56)-H(56C) | 109.5      | C(5A)-C(6A)-H(6A)   | 120.1      |
| C(52)-C(57)-H(57A)  | 109.5      | C(2B)-C(1B)-C(6B)   | 117.1(12)  |
| C(52)-C(57)-H(57B)  | 109.5      | C(2B)-C(1B)-H(1B1)  | 121.5      |
| H(57A)-C(57)-H(57B) | 109.5      | C(6B)-C(1B)-H(1B1)  | 121.5      |
| C(52)-C(57)-H(57C)  | 109.5      | C(1B)-C(2B)-C(3B)   | 127.0(11)  |

|                     |           |                   |           |
|---------------------|-----------|-------------------|-----------|
| H(57A)-C(57)-H(57C) | 109.5     | C(1B)-C(2B)-H(2B) | 116.5     |
| H(57B)-C(57)-H(57C) | 109.5     | C(3B)-C(2B)-H(2B) | 116.5     |
| C(53)-C(58)-H(58A)  | 109.5     | C(4B)-C(3B)-C(2B) | 115.9(8)  |
| C(53)-C(58)-H(58B)  | 109.5     | C(4B)-C(3B)-H(3B) | 122.1     |
| H(58A)-C(58)-H(58B) | 109.5     | C(2B)-C(3B)-H(3B) | 122.1     |
| C(53)-C(58)-H(58C)  | 109.5     | C(3B)-C(4B)-C(5B) | 118.1(6)  |
| H(58A)-C(58)-H(58C) | 109.5     | C(3B)-C(4B)-H(4B) | 121.0     |
| H(58B)-C(58)-H(58C) | 109.5     | C(5B)-C(4B)-H(4B) | 121.0     |
| C(54)-C(59)-H(59A)  | 109.5     | C(4B)-C(5B)-C(6B) | 126.1(9)  |
| C(54)-C(59)-H(59B)  | 109.5     | C(4B)-C(5B)-H(5B) | 117.0     |
| H(59A)-C(59)-H(59B) | 109.5     | C(6B)-C(5B)-H(5B) | 117.0     |
| C(54)-C(59)-H(59C)  | 109.5     | C(1B)-C(6B)-C(5B) | 115.9(12) |
| C(1B)-C(6B)-H(6B)   | 122.1     | C(3C)-C(2C)-C(1C) | 119.6(5)  |
| C(5B)-C(6B)-H(6B)   | 122.1     | C(3C)-C(2C)-H(2C) | 120.2     |
| C(6D)-C(1D)-C(2D)   | 124.1(11) | C(1C)-C(2C)-H(2C) | 120.2     |
| C(6D)-C(1D)-H(1D)   | 118.0     | C(2C)-C(3C)-C(4C) | 120.0(5)  |
| C(2D)-C(1D)-H(1D)   | 118.0     | C(2C)-C(3C)-H(3C) | 120.0     |
| C(1D)-C(2D)-C(3D)   | 111.3(11) | C(4C)-C(3C)-H(3C) | 120.0     |
| C(1D)-C(2D)-H(2D)   | 124.4     | C(5C)-C(4C)-C(3C) | 120.3(5)  |
| C(3D)-C(2D)-H(2D)   | 124.4     | C(5C)-C(4C)-H(4C) | 119.9     |
| C(2D)-C(3D)-H(3D)   | 116.7     | C(3C)-C(4C)-H(4C) | 119.9     |
| C(6D)-C(5D)-H(5D)   | 122.2     | C(4C)-C(5C)-C(6C) | 119.9(5)  |
| C(1D)-C(6D)-C(5D)   | 122.8(13) | C(4C)-C(5C)-H(5C) | 120.1     |
| C(1D)-C(6D)-H(6D)   | 118.6     | C(6C)-C(5C)-H(5C) | 120.1     |
| C(5D)-C(6D)-H(6D)   | 118.6     | C(5C)-C(6C)-C(1C) | 120.1(5)  |
| C(2C)-C(1C)-C(6C)   | 120.0(5)  | C(5C)-C(6C)-H(6C) | 119.9     |
| C(2C)-C(1C)-H(1C)   | 120.0     | C(1C)-C(6C)-H(6C) | 119.9     |
| C(6C)-C(1C)-H(1C)   | 120.0     |                   |           |

---

Symmetry transformations used to generate equivalent atoms:

Table 4. Anisotropic displacement parameters ( $\text{\AA}^2 \times 10^3$ ) for **3**. The anisotropic displacement factor exponent takes the form:  $-2 \pi^2 [ h^2 a^{*2} U_{11} + \dots + 2 h k a^* b^* U_{12} ]$

|       | U11   | U22   | U33   | U23    | U13    | U12    |
|-------|-------|-------|-------|--------|--------|--------|
| Zn(1) | 10(1) | 15(1) | 11(1) | -4(1)  | 2(1)   | -6(1)  |
| Zn(2) | 11(1) | 22(1) | 19(1) | -7(1)  | 2(1)   | -7(1)  |
| P(1)  | 10(1) | 12(1) | 11(1) | -3(1)  | 2(1)   | -4(1)  |
| P(2)  | 11(1) | 14(1) | 10(1) | -3(1)  | 2(1)   | -6(1)  |
| N(1)  | 11(1) | 14(1) | 11(1) | -3(1)  | 2(1)   | -5(1)  |
| N(2)  | 12(1) | 18(1) | 11(1) | -3(1)  | 1(1)   | -8(1)  |
| C(1)  | 12(1) | 15(1) | 12(1) | -2(1)  | 3(1)   | -5(1)  |
| C(2)  | 13(1) | 21(1) | 11(1) | -4(1)  | 2(1)   | -10(1) |
| C(3)  | 15(1) | 23(1) | 14(1) | -4(1)  | 2(1)   | -8(1)  |
| C(4)  | 15(1) | 31(1) | 17(1) | -9(1)  | 3(1)   | -8(1)  |
| C(5)  | 18(1) | 42(1) | 14(1) | -9(1)  | 5(1)   | -18(1) |
| C(6)  | 28(1) | 33(1) | 15(1) | -3(1)  | 3(1)   | -22(1) |
| C(7)  | 21(1) | 22(1) | 15(1) | -5(1)  | 4(1)   | -13(1) |
| C(8)  | 16(1) | 15(1) | 12(1) | -3(1)  | 1(1)   | -8(1)  |
| C(9)  | 16(1) | 21(1) | 18(1) | -5(1)  | 0(1)   | -9(1)  |
| C(10) | 25(1) | 27(1) | 21(1) | -7(1)  | -2(1)  | -16(1) |
| C(11) | 34(1) | 24(1) | 22(1) | -11(1) | 3(1)   | -17(1) |
| C(12) | 25(1) | 21(1) | 24(1) | -11(1) | 6(1)   | -10(1) |
| C(13) | 17(1) | 18(1) | 18(1) | -6(1)  | 2(1)   | -9(1)  |
| C(14) | 13(1) | 20(1) | 12(1) | -4(1)  | 2(1)   | -10(1) |
| C(15) | 15(1) | 20(1) | 15(1) | -2(1)  | 0(1)   | -9(1)  |
| C(16) | 17(1) | 27(1) | 15(1) | -1(1)  | -1(1)  | -10(1) |
| C(17) | 20(1) | 36(1) | 13(1) | -6(1)  | 1(1)   | -16(1) |
| C(18) | 25(1) | 32(1) | 16(1) | -10(1) | 5(1)   | -19(1) |
| C(19) | 18(1) | 22(1) | 14(1) | -5(1)  | 4(1)   | -13(1) |
| C(20) | 22(1) | 17(1) | 20(1) | 0(1)   | -5(1)  | -9(1)  |
| C(21) | 51(1) | 26(1) | 29(1) | 5(1)   | -10(1) | -23(1) |
| C(22) | 23(1) | 23(1) | 33(1) | -9(1)  | -1(1)  | -4(1)  |
| C(23) | 30(1) | 20(1) | 16(1) | -7(1)  | 4(1)   | -15(1) |
| C(24) | 27(1) | 27(1) | 26(1) | -11(1) | 7(1)   | -14(1) |
| C(25) | 43(1) | 25(1) | 30(1) | -13(1) | 18(1)  | -22(1) |
| C(26) | 10(1) | 17(1) | 10(1) | -3(1)  | 2(1)   | -5(1)  |
| C(27) | 12(1) | 17(1) | 13(1) | -3(1)  | 2(1)   | -6(1)  |
| C(28) | 17(1) | 21(1) | 17(1) | -1(1)  | 4(1)   | -9(1)  |
| C(29) | 18(1) | 28(1) | 15(1) | -3(1)  | 7(1)   | -7(1)  |
| C(30) | 16(1) | 25(1) | 16(1) | -9(1)  | 4(1)   | -5(1)  |
| C(31) | 12(1) | 19(1) | 15(1) | -6(1)  | 2(1)   | -5(1)  |
| C(32) | 17(1) | 16(1) | 17(1) | -4(1)  | 5(1)   | -9(1)  |
| C(33) | 23(1) | 17(1) | 27(1) | -4(1)  | 5(1)   | -8(1)  |

|       |       |       |         |        |        |        |
|-------|-------|-------|---------|--------|--------|--------|
| C(34) | 24(1) | 27(1) | 24(1)   | -8(1)  | 4(1)   | -15(1) |
| C(35) | 16(1) | 19(1) | 20(1)   | -11(1) | 4(1)   | -7(1)  |
| C(36) | 20(1) | 26(1) | 30(1)   | -15(1) | -2(1)  | -6(1)  |
| C(37) | 21(1) | 20(1) | 22(1)   | -9(1)  | 1(1)   | -7(1)  |
| C(38) | 14(1) | 14(1) | 17(1)   | -4(1)  | 6(1)   | -5(1)  |
| C(39) | 20(1) | 17(1) | 20(1)   | -6(1)  | 6(1)   | -8(1)  |
| C(40) | 29(1) | 20(1) | 32(1)   | -14(1) | 15(1)  | -12(1) |
| C(41) | 30(1) | 13(1) | 40(1)   | -6(1)  | 17(1)  | -3(1)  |
| C(42) | 23(1) | 18(1) | 28(1)   | 1(1)   | 5(1)   | -1(1)  |
| C(43) | 18(1) | 19(1) | 20(1)   | -1(1)  | 3(1)   | -4(1)  |
| C(44) | 11(1) | 15(1) | 13(1)   | -4(1)  | 1(1)   | -4(1)  |
| C(45) | 16(1) | 16(1) | 15(1)   | -3(1)  | 2(1)   | -6(1)  |
| C(46) | 20(1) | 20(1) | 12(1)   | -3(1)  | 0(1)   | -6(1)  |
| C(47) | 21(1) | 26(1) | 16(1)   | -7(1)  | -2(1)  | -9(1)  |
| C(48) | 21(1) | 24(1) | 21(1)   | -7(1)  | 0(1)   | -13(1) |
| C(49) | 16(1) | 20(1) | 15(1)   | -4(1)  | 1(1)   | -8(1)  |
| C(50) | 14(1) | 29(1) | 22(1)   | -5(1)  | 0(1)   | -11(1) |
| C(51) | 11(1) | 28(1) | 20(1)   | -1(1)  | 2(1)   | -8(1)  |
| C(52) | 12(1) | 28(1) | 19(1)   | -5(1)  | 4(1)   | -3(1)  |
| C(53) | 12(1) | 24(1) | 20(1)   | -5(1)  | 4(1)   | -3(1)  |
| C(54) | 12(1) | 28(1) | 16(1)   | -3(1)  | 0(1)   | -7(1)  |
| C(55) | 31(1) | 41(1) | 35(1)   | -13(1) | -2(1)  | -23(1) |
| C(56) | 20(1) | 35(1) | 31(1)   | 3(1)   | 6(1)   | -12(1) |
| C(57) | 23(1) | 39(1) | 21(1)   | -10(1) | 7(1)   | -4(1)  |
| C(58) | 27(1) | 24(1) | 33(1)   | -9(1)  | 8(1)   | -3(1)  |
| C(59) | 26(1) | 35(1) | 18(1)   | -1(1)  | -3(1)  | -11(1) |
| C(1A) | 62(1) | 61(1) | 44(1)   | -19(1) | 24(1)  | -39(1) |
| C(2A) | 67(2) | 68(2) | 37(1)   | -19(1) | 11(1)  | -46(1) |
| C(3A) | 43(1) | 46(1) | 46(1)   | -15(1) | 12(1)  | -28(1) |
| C(4A) | 44(1) | 30(1) | 37(1)   | -10(1) | 13(1)  | -15(1) |
| C(5A) | 41(1) | 30(1) | 40(1)   | -8(1)  | -1(1)  | -12(1) |
| C(6A) | 38(1) | 37(1) | 55(1)   | -11(1) | 9(1)   | -19(1) |
| C(1B) | 39(3) | 26(3) | 108(10) | -14(5) | 3(5)   | -16(2) |
| C(2B) | 55(6) | 36(4) | 98(8)   | -30(5) | 38(6)  | -26(4) |
| C(3B) | 80(5) | 50(4) | 14(4)   | 0(3)   | 5(3)   | -45(3) |
| C(4B) | 47(1) | 39(1) | 55(1)   | -3(1)  | -10(1) | -28(1) |
| C(5B) | 36(5) | 53(5) | 99(7)   | -55(5) | 34(4)  | -29(4) |
| C(6B) | 85(8) | 52(8) | 29(3)   | -5(4)  | 2(4)   | -50(6) |
| C(1D) | 66(9) | 26(4) | 43(4)   | -1(3)  | -15(4) | -20(5) |
| C(2D) | 64(5) | 43(5) | 63(6)   | -8(4)  | -6(4)  | -27(4) |
| C(3D) | 81(5) | 67(6) | 13(4)   | 5(4)   | -1(3)  | -52(4) |
| C(4D) | 47(1) | 39(1) | 55(1)   | -3(1)  | -10(1) | -28(1) |

|       |        |         |         |        |       |        |
|-------|--------|---------|---------|--------|-------|--------|
| C(5D) | 38(4)  | 35(3)   | 42(3)   | -20(2) | 13(2) | -26(3) |
| C(6D) | 84(7)  | 45(6)   | 37(3)   | -7(4)  | -6(4) | -44(5) |
| C(1C) | 77(8)  | 104(12) | 55(9)   | 32(6)  | -5(6) | -68(8) |
| C(2C) | 141(9) | 91(7)   | 69(5)   | -20(5) | 48(6) | -98(7) |
| C(3C) | 66(4)  | 45(4)   | 66(6)   | -5(4)  | 35(4) | -35(3) |
| C(4C) | 56(4)  | 77(5)   | 51(6)   | 7(4)   | 19(3) | -41(4) |
| C(5C) | 121(8) | 63(4)   | 96(7)   | -27(4) | 77(6) | -63(5) |
| C(6C) | 46(4)  | 58(6)   | 143(11) | 48(6)  | 31(6) | -18(4) |

Table 5. Hydrogen coordinates ( $\times 10^4$ ) and isotropic displacement parameters ( $\text{\AA}^2 \times 10^3$ ) for **3**.

| x      | y    | z    | U(eq) |    |
|--------|------|------|-------|----|
| H(1)   | 5536 | 3017 | 7598  | 16 |
| H(3)   | 5651 | 3064 | 6561  | 21 |
| H(4)   | 6733 | 3139 | 5686  | 25 |
| H(5)   | 6564 | 4907 | 5035  | 27 |
| H(6)   | 5319 | 6602 | 5262  | 28 |
| H(7)   | 4221 | 6545 | 6130  | 22 |
| H(9)   | 5617 | 5524 | 7407  | 22 |
| H(10)  | 5547 | 6929 | 7854  | 27 |
| H(11)  | 3764 | 8146 | 8140  | 29 |
| H(12)  | 2037 | 7991 | 7950  | 27 |
| H(13)  | 2086 | 6616 | 7477  | 21 |
| H(16)  | 576  | 7263 | 4932  | 25 |
| H(17)  | 629  | 5726 | 4624  | 27 |
| H(18)  | 1714 | 3852 | 5286  | 25 |
| H(20)  | 2127 | 7085 | 6326  | 25 |
| H(21A) | 2011 | 8123 | 5230  | 54 |
| H(21B) | 1348 | 8962 | 5651  | 54 |
| H(21C) | 598  | 8701 | 5189  | 54 |
| H(22A) | -393 | 8032 | 6089  | 43 |
| H(22B) | 312  | 8282 | 6581  | 43 |
| H(22C) | 374  | 7030 | 6723  | 43 |
| H(23)  | 3401 | 3005 | 6799  | 25 |
| H(24A) | 3462 | 2232 | 5699  | 38 |
| H(24B) | 4336 | 1493 | 6351  | 38 |
| H(24C) | 4404 | 2616 | 5901  | 38 |
| H(25A) | 1592 | 2917 | 6936  | 44 |
| H(25B) | 2591 | 1678 | 6936  | 44 |

|        |       |       |       |    |
|--------|-------|-------|-------|----|
| H(25C) | 1659  | 2502  | 6313  | 44 |
| H(28)  | 1055  | 1572  | 9586  | 23 |
| H(29)  | 465   | 2854  | 10191 | 27 |
| H(30)  | 919   | 4406  | 9924  | 25 |
| H(32)  | 2769  | 1642  | 8268  | 20 |
| H(33A) | 2663  | -21   | 9383  | 35 |
| H(33B) | 3802  | 199   | 9238  | 35 |
| H(33C) | 3350  | -330  | 8789  | 35 |
| H(34A) | 1506  | 896   | 8031  | 35 |
| H(34B) | 729   | 2214  | 8003  | 35 |
| H(34C) | 775   | 1207  | 8611  | 35 |
| H(35)  | 2526  | 5087  | 8644  | 21 |
| H(36A) | 1787  | 5545  | 9824  | 38 |
| H(36B) | 2477  | 6128  | 9353  | 38 |
| H(36C) | 3128  | 4783  | 9732  | 38 |
| H(37A) | 498   | 6049  | 8250  | 32 |
| H(37B) | 841   | 6893  | 8497  | 32 |
| H(37C) | 149   | 6257  | 8926  | 32 |
| H(39)  | 4369  | 1445  | 7632  | 23 |
| H(40)  | 5321  | -511  | 7727  | 30 |
| H(41)  | 6671  | -1809 | 8627  | 36 |
| H(42)  | 7072  | -1147 | 9428  | 34 |
| H(43)  | 6096  | 819   | 9345  | 26 |
| H(45)  | 4221  | 2041  | 9738  | 20 |
| H(46)  | 4893  | 2289  | 10648 | 23 |
| H(47)  | 5877  | 3432  | 10547 | 25 |
| H(48)  | 6168  | 4360  | 9532  | 25 |
| H(49)  | 5491  | 4127  | 8618  | 21 |
| H(55A) | -1780 | 4148  | 6391  | 49 |
| H(55B) | -2393 | 3612  | 6945  | 49 |
| H(55C) | -985  | 3138  | 7016  | 49 |
| H(56A) | -1130 | 3269  | 8718  | 47 |
| H(56B) | -1451 | 2827  | 8173  | 47 |
| H(56C) | -2482 | 3616  | 8508  | 47 |
| H(57A) | -2801 | 5919  | 8749  | 46 |
| H(57B) | -1834 | 6394  | 8601  | 46 |
| H(57C) | -1422 | 5048  | 8931  | 46 |
| H(58A) | -2017 | 7872  | 6873  | 47 |
| H(58B) | -2050 | 7708  | 7625  | 47 |
| H(58C) | -3238 | 8116  | 7173  | 47 |
| H(59A) | -1518 | 6588  | 6056  | 43 |
| H(59B) | -2927 | 7156  | 6042  | 43 |

|        |       |       |       |     |
|--------|-------|-------|-------|-----|
| H(59C) | -2234 | 5920  | 5932  | 43  |
| H(1A1) | 7632  | 410   | 7905  | 61  |
| H(2A)  | 9436  | 493   | 7956  | 61  |
| H(3A)  | 10357 | 736   | 7030  | 50  |
| H(4A)  | 9497  | 855   | 6065  | 45  |
| H(5A)  | 7725  | 720   | 6023  | 47  |
| H(6A)  | 6804  | 472   | 6946  | 52  |
| H(1B1) | 4935  | -1925 | 6117  | 70  |
| H(2B)  | 4824  | -1140 | 5038  | 71  |
| H(3B)  | 3260  | 515   | 4422  | 53  |
| H(4B)  | 1686  | 1494  | 4956  | 56  |
| H(5B)  | 1788  | 745   | 6040  | 62  |
| H(6B)  | 3325  | -960  | 6655  | 59  |
| H(1D)  | 4592  | -1735 | 6365  | 56  |
| H(2D)  | 4988  | -1411 | 5290  | 68  |
| H(3D)  | 3507  | 257   | 4576  | 60  |
| H(4D)  | 1791  | 1462  | 4866  | 56  |
| H(5D)  | 1407  | 1037  | 5943  | 40  |
| H(6D)  | 2908  | -549  | 6675  | 61  |
| H(1C)  | 11455 | -770  | 10744 | 97  |
| H(2C)  | 9658  | 846   | 10677 | 101 |
| H(3C)  | 8224  | 1545  | 9805  | 70  |
| H(4C)  | 8565  | 595   | 9024  | 76  |
| H(5C)  | 10278 | -1107 | 9145  | 102 |
| H(6C)  | 11706 | -1812 | 10016 | 123 |

Table 6. Torsion angles [deg] for **3**.

|                        |             |                     |             |
|------------------------|-------------|---------------------|-------------|
| N(2)-Zn(1)-Zn(2)-C(50) | 80.63(9)    | N(2)-P(2)-C(2)-C(3) | -94.35(11)  |
| N(1)-Zn(1)-Zn(2)-C(50) | -105.27(8)  | C(1)-P(2)-C(2)-C(3) | 31.70(12)   |
| N(2)-Zn(1)-Zn(2)-C(54) | 9.07(8)     | C(8)-P(2)-C(2)-C(3) | 147.79(10)  |
| N(1)-Zn(1)-Zn(2)-C(54) | -176.84(8)  | N(2)-P(2)-C(2)-C(7) | 82.81(11)   |
| N(2)-Zn(1)-Zn(2)-C(51) | 161.13(9)   | C(1)-P(2)-C(2)-C(7) | -151.14(10) |
| N(1)-Zn(1)-Zn(2)-C(51) | -24.77(9)   | C(8)-P(2)-C(2)-C(7) | -35.04(12)  |
| N(2)-Zn(1)-Zn(2)-C(53) | -56.23(8)   | C(7)-C(2)-C(3)-C(4) | 0.66(19)    |
| N(1)-Zn(1)-Zn(2)-C(53) | 117.87(7)   | P(2)-C(2)-C(3)-C(4) | 177.84(10)  |
| N(2)-Zn(1)-Zn(2)-C(52) | -123.15(8)  | C(2)-C(3)-C(4)-C(5) | -0.2(2)     |
| N(1)-Zn(1)-Zn(2)-C(52) | 50.95(8)    | C(3)-C(4)-C(5)-C(6) | 0.0(2)      |
| C(1)-P(1)-N(1)-C(26)   | -168.16(10) | C(4)-C(5)-C(6)-C(7) | -0.3(2)     |

|                         |             |                         |             |
|-------------------------|-------------|-------------------------|-------------|
| C(44)-P(1)-N(1)-C(26)   | -40.21(11)  | C(5)-C(6)-C(7)-C(2)     | 0.7(2)      |
| C(38)-P(1)-N(1)-C(26)   | 74.72(11)   | C(3)-C(2)-C(7)-C(6)     | -0.89(19)   |
| C(1)-P(1)-N(1)-Zn(1)    | 5.87(9)     | P(2)-C(2)-C(7)-C(6)     | -178.09(10) |
| C(44)-P(1)-N(1)-Zn(1)   | 133.82(7)   | N(2)-P(2)-C(8)-C(13)    | 16.94(12)   |
| C(38)-P(1)-N(1)-Zn(1)   | -111.25(8)  | C(1)-P(2)-C(8)-C(13)    | -108.91(11) |
| N(2)-Zn(1)-N(1)-C(26)   | 163.37(8)   | C(2)-P(2)-C(8)-C(13)    | 136.60(11)  |
| Zn(2)-Zn(1)-N(1)-C(26)  | -11.99(9)   | N(2)-P(2)-C(8)-C(9)     | -168.01(10) |
| N(2)-Zn(1)-N(1)-P(1)    | -11.26(9)   | C(1)-P(2)-C(8)-C(9)     | 66.13(12)   |
| Zn(2)-Zn(1)-N(1)-P(1)   | 173.38(5)   | C(2)-P(2)-C(8)-C(9)     | -48.36(12)  |
| C(1)-P(2)-N(2)-C(14)    | -120.40(11) | C(13)-C(8)-C(9)-C(10)   | -0.3(2)     |
| C(2)-P(2)-N(2)-C(14)    | 1.37(13)    | P(2)-C(8)-C(9)-C(10)    | -175.49(11) |
| C(8)-P(2)-N(2)-C(14)    | 116.85(11)  | C(8)-C(9)-C(10)-C(11)   | 1.1(2)      |
| C(1)-P(2)-N(2)-Zn(1)    | 35.86(9)    | C(9)-C(10)-C(11)-C(12)  | -1.0(2)     |
| C(2)-P(2)-N(2)-Zn(1)    | 157.63(6)   | C(10)-C(11)-C(12)-C(13) | 0.1(2)      |
| C(8)-P(2)-N(2)-Zn(1)    | -86.88(7)   | C(9)-C(8)-C(13)-C(12)   | -0.6(2)     |
| N(1)-Zn(1)-N(2)-C(14)   | 148.06(8)   | P(2)-C(8)-C(13)-C(12)   | 174.49(11)  |
| Zn(2)-Zn(1)-N(2)-C(14)  | -37.25(10)  | C(11)-C(12)-C(13)-C(8)  | 0.7(2)      |
| N(1)-Zn(1)-N(2)-P(2)    | -11.36(8)   | P(2)-N(2)-C(14)-C(19)   | 92.08(14)   |
| Zn(2)-Zn(1)-N(2)-P(2)   | 163.33(4)   | Zn(1)-N(2)-C(14)-C(19)  | -65.35(14)  |
| N(1)-P(1)-C(1)-P(2)     | 24.71(11)   | P(2)-N(2)-C(14)-C(15)   | -94.44(14)  |
| C(44)-P(1)-C(1)-P(2)    | -99.60(10)  | Zn(1)-N(2)-C(14)-C(15)  | 108.13(11)  |
| C(38)-P(1)-C(1)-P(2)    | 148.58(9)   | C(19)-C(14)-C(15)-C(16) | 1.72(19)    |
| N(2)-P(2)-C(1)-P(1)     | -48.13(11)  | N(2)-C(14)-C(15)-C(16)  | -171.80(12) |
| C(2)-P(2)-C(1)-P(1)     | -172.38(9)  | C(19)-C(14)-C(15)-C(20) | 177.79(12)  |
| C(8)-P(2)-C(1)-P(1)     | 74.41(10)   | N(2)-C(14)-C(15)-C(20)  | 4.27(19)    |
| C(14)-C(15)-C(16)-C(17) | 0.8(2)      | C(28)-C(27)-C(32)-C(34) | 61.05(16)   |
| C(20)-C(15)-C(16)-C(17) | -175.27(13) | C(26)-C(27)-C(32)-C(34) | -118.01(13) |
| C(15)-C(16)-C(17)-C(18) | -2.1(2)     | C(28)-C(27)-C(32)-C(33) | -62.09(16)  |
| C(16)-C(17)-C(18)-C(19) | 0.9(2)      | C(26)-C(27)-C(32)-C(33) | 118.85(13)  |
| C(17)-C(18)-C(19)-C(14) | 1.6(2)      | C(30)-C(31)-C(35)-C(36) | 50.23(17)   |
| C(17)-C(18)-C(19)-C(23) | -179.66(13) | C(26)-C(31)-C(35)-C(36) | -134.12(13) |
| C(15)-C(14)-C(19)-C(18) | -2.90(19)   | C(30)-C(31)-C(35)-C(37) | -72.13(15)  |
| N(2)-C(14)-C(19)-C(18)  | 170.60(12)  | C(26)-C(31)-C(35)-C(37) | 103.51(14)  |
| C(15)-C(14)-C(19)-C(23) | 178.41(12)  | N(1)-P(1)-C(38)-C(43)   | -121.20(12) |
| N(2)-C(14)-C(19)-C(23)  | -8.09(19)   | C(1)-P(1)-C(38)-C(43)   | 118.00(12)  |
| C(16)-C(15)-C(20)-C(21) | -34.97(19)  | C(44)-P(1)-C(38)-C(43)  | -2.75(13)   |
| C(14)-C(15)-C(20)-C(21) | 149.01(14)  | N(1)-P(1)-C(38)-C(39)   | 60.98(12)   |
| C(16)-C(15)-C(20)-C(22) | 89.40(15)   | C(1)-P(1)-C(38)-C(39)   | -59.81(11)  |
| C(14)-C(15)-C(20)-C(22) | -86.61(15)  | C(44)-P(1)-C(38)-C(39)  | 179.44(10)  |
| C(18)-C(19)-C(23)-C(24) | 54.90(17)   | C(43)-C(38)-C(39)-C(40) | 2.0(2)      |
| C(14)-C(19)-C(23)-C(24) | -126.40(14) | P(1)-C(38)-C(39)-C(40)  | 179.94(11)  |
| C(18)-C(19)-C(23)-C(25) | -68.73(16)  | C(38)-C(39)-C(40)-C(41) | -1.1(2)     |



|                         |             |                         |             |
|-------------------------|-------------|-------------------------|-------------|
| C(14)-C(19)-C(23)-C(25) | 109.98(14)  | C(39)-C(40)-C(41)-C(42) | -0.3(2)     |
| P(1)-N(1)-C(26)-C(27)   | -94.09(13)  | C(40)-C(41)-C(42)-C(43) | 0.8(2)      |
| Zn(1)-N(1)-C(26)-C(27)  | 90.97(12)   | C(39)-C(38)-C(43)-C(42) | -1.5(2)     |
| P(1)-N(1)-C(26)-C(31)   | 91.84(13)   | P(1)-C(38)-C(43)-C(42)  | -179.23(11) |
| Zn(1)-N(1)-C(26)-C(31)  | -83.10(12)  | C(41)-C(42)-C(43)-C(38) | 0.1(2)      |
| C(31)-C(26)-C(27)-C(28) | -2.70(18)   | N(1)-P(1)-C(44)-C(49)   | -117.62(11) |
| N(1)-C(26)-C(27)-C(28)  | -176.76(11) | C(1)-P(1)-C(44)-C(49)   | 7.41(13)    |
| C(31)-C(26)-C(27)-C(32) | 176.36(11)  | C(38)-P(1)-C(44)-C(49)  | 119.79(11)  |
| N(1)-C(26)-C(27)-C(32)  | 2.30(18)    | N(1)-P(1)-C(44)-C(45)   | 62.67(12)   |
| C(26)-C(27)-C(28)-C(29) | -0.8(2)     | C(1)-P(1)-C(44)-C(45)   | -172.30(10) |
| C(32)-C(27)-C(28)-C(29) | -179.89(12) | C(38)-P(1)-C(44)-C(45)  | -59.92(12)  |
| C(27)-C(28)-C(29)-C(30) | 2.1(2)      | C(49)-C(44)-C(45)-C(46) | -0.33(19)   |
| C(28)-C(29)-C(30)-C(31) | 0.1(2)      | P(1)-C(44)-C(45)-C(46)  | 179.38(10)  |
| C(29)-C(30)-C(31)-C(26) | -3.5(2)     | C(44)-C(45)-C(46)-C(47) | -0.2(2)     |
| C(29)-C(30)-C(31)-C(35) | 172.30(13)  | C(45)-C(46)-C(47)-C(48) | 0.6(2)      |
| C(27)-C(26)-C(31)-C(30) | 4.78(18)    | C(46)-C(47)-C(48)-C(49) | -0.4(2)     |
| N(1)-C(26)-C(31)-C(30)  | 178.85(11)  | C(47)-C(48)-C(49)-C(44) | -0.2(2)     |
| C(27)-C(26)-C(31)-C(35) | -170.88(12) | C(45)-C(44)-C(49)-C(48) | 0.5(2)      |
| N(1)-C(26)-C(31)-C(35)  | 3.19(18)    | P(1)-C(44)-C(49)-C(48)  | -179.20(11) |
| C(51)-Zn(2)-C(50)-C(54) | 116.08(13)  | Zn(2)-C(51)-C(52)-C(53) | 63.02(10)   |
| C(53)-Zn(2)-C(50)-C(54) | 37.29(8)    | C(50)-C(51)-C(52)-C(57) | 177.69(13)  |
| C(52)-Zn(2)-C(50)-C(54) | 79.04(9)    | C(56)-C(51)-C(52)-C(57) | 3.1(2)      |
| Zn(1)-Zn(2)-C(50)-C(54) | -115.28(9)  | Zn(2)-C(51)-C(52)-C(57) | -119.64(14) |
| C(54)-Zn(2)-C(50)-C(51) | -116.08(13) | C(50)-C(51)-C(52)-Zn(2) | -62.67(10)  |
| C(53)-Zn(2)-C(50)-C(51) | -78.79(9)   | C(56)-C(51)-C(52)-Zn(2) | 122.76(14)  |
| C(52)-Zn(2)-C(50)-C(51) | -37.03(8)   | C(50)-Zn(2)-C(52)-C(51) | 37.33(8)    |
| Zn(1)-Zn(2)-C(50)-C(51) | 128.64(8)   | C(54)-Zn(2)-C(52)-C(51) | 79.40(9)    |
| C(54)-Zn(2)-C(50)-C(55) | 122.59(16)  | C(53)-Zn(2)-C(52)-C(51) | 116.80(12)  |
| C(51)-Zn(2)-C(50)-C(55) | -121.33(16) | Zn(1)-Zn(2)-C(52)-C(51) | -129.40(8)  |
| C(53)-Zn(2)-C(50)-C(55) | 159.88(14)  | C(50)-Zn(2)-C(52)-C(53) | -79.48(9)   |
| C(52)-Zn(2)-C(50)-C(55) | -158.37(14) | C(54)-Zn(2)-C(52)-C(53) | -37.41(9)   |
| Zn(1)-Zn(2)-C(50)-C(55) | 7.31(18)    | C(51)-Zn(2)-C(52)-C(53) | -116.80(12) |
| C(54)-C(50)-C(51)-C(52) | -0.42(15)   | Zn(1)-Zn(2)-C(52)-C(53) | 113.79(9)   |
| C(55)-C(50)-C(51)-C(52) | -179.10(14) | C(50)-Zn(2)-C(52)-C(57) | 157.17(15)  |
| Zn(2)-C(50)-C(51)-C(52) | 63.33(10)   | C(54)-Zn(2)-C(52)-C(57) | -160.76(16) |
| C(54)-C(50)-C(51)-C(56) | 174.10(13)  | C(51)-Zn(2)-C(52)-C(57) | 119.85(17)  |
| C(55)-C(50)-C(51)-C(56) | -4.6(2)     | C(53)-Zn(2)-C(52)-C(57) | -123.35(18) |
| Zn(2)-C(50)-C(51)-C(56) | -122.14(14) | Zn(1)-Zn(2)-C(52)-C(57) | -9.56(18)   |
| C(54)-C(50)-C(51)-Zn(2) | -63.76(9)   | C(51)-C(52)-C(53)-C(54) | -0.14(16)   |
| C(55)-C(50)-C(51)-Zn(2) | 117.57(15)  | C(57)-C(52)-C(53)-C(54) | -177.39(14) |
| C(50)-Zn(2)-C(51)-C(52) | -117.07(12) | Zn(2)-C(52)-C(53)-C(54) | 62.73(10)   |
| C(54)-Zn(2)-C(51)-C(52) | -79.28(9)   | C(51)-C(52)-C(53)-C(58) | 177.34(14)  |

|                         |             |                         |             |
|-------------------------|-------------|-------------------------|-------------|
| C(53)-Zn(2)-C(51)-C(52) | -37.33(8)   | C(57)-C(52)-C(53)-C(58) | 0.1(2)      |
| Zn(1)-Zn(2)-C(51)-C(52) | 118.45(9)   | Zn(2)-C(52)-C(53)-C(58) | -119.78(15) |
| C(54)-Zn(2)-C(51)-C(50) | 37.79(9)    | C(51)-C(52)-C(53)-Zn(2) | -62.88(10)  |
| C(53)-Zn(2)-C(51)-C(50) | 79.73(9)    | C(57)-C(52)-C(53)-Zn(2) | 119.87(15)  |
| C(52)-Zn(2)-C(51)-C(50) | 117.07(12)  | C(50)-Zn(2)-C(53)-C(54) | -37.44(8)   |
| Zn(1)-Zn(2)-C(51)-C(50) | -124.48(9)  | C(51)-Zn(2)-C(53)-C(54) | -79.48(9)   |
| C(50)-Zn(2)-C(51)-C(56) | 121.55(18)  | C(52)-Zn(2)-C(53)-C(54) | -116.72(13) |
| C(54)-Zn(2)-C(51)-C(56) | 159.33(16)  | Zn(1)-Zn(2)-C(53)-C(54) | 119.68(8)   |
| C(53)-Zn(2)-C(51)-C(56) | -158.72(16) | C(50)-Zn(2)-C(53)-C(52) | 79.28(10)   |
| C(52)-Zn(2)-C(51)-C(56) | -121.39(17) | C(54)-Zn(2)-C(53)-C(52) | 116.72(13)  |
| Zn(1)-Zn(2)-C(51)-C(56) | -2.9(2)     | C(51)-Zn(2)-C(53)-C(52) | 37.24(9)    |
| C(50)-C(51)-C(52)-C(53) | 0.35(16)    | Zn(1)-Zn(2)-C(53)-C(52) | -123.61(8)  |
| C(56)-C(51)-C(52)-C(53) | -174.22(13) | C(50)-Zn(2)-C(53)-C(58) | -158.29(14) |
| C(54)-Zn(2)-C(53)-C(58) | -120.85(16) | Zn(1)-Zn(2)-C(54)-C(53) | -115.61(8)  |
| C(51)-Zn(2)-C(53)-C(58) | 159.67(15)  | C(50)-Zn(2)-C(54)-C(59) | -121.91(16) |
| C(52)-Zn(2)-C(53)-C(58) | 122.43(17)  | C(51)-Zn(2)-C(54)-C(59) | -159.67(15) |
| Zn(1)-Zn(2)-C(53)-C(58) | -1.18(16)   | C(53)-Zn(2)-C(54)-C(59) | 121.29(16)  |
| C(51)-C(50)-C(54)-C(53) | 0.33(15)    | C(52)-Zn(2)-C(54)-C(59) | 158.61(15)  |
| C(55)-C(50)-C(54)-C(53) | 178.99(14)  | Zn(1)-Zn(2)-C(54)-C(59) | 5.68(17)    |
| Zn(2)-C(50)-C(54)-C(53) | -63.63(10)  | C(6A)-C(1A)-C(2A)-C(3A) | 1.6(4)      |
| C(51)-C(50)-C(54)-C(59) | -179.31(13) | C(1A)-C(2A)-C(3A)-C(4A) | -0.6(3)     |
| C(55)-C(50)-C(54)-C(59) | -0.7(2)     | C(2A)-C(3A)-C(4A)-C(5A) | -0.3(3)     |
| Zn(2)-C(50)-C(54)-C(59) | 116.73(14)  | C(3A)-C(4A)-C(5A)-C(6A) | 0.3(3)      |
| C(51)-C(50)-C(54)-Zn(2) | 63.96(9)    | C(2A)-C(1A)-C(6A)-C(5A) | -1.7(3)     |
| C(55)-C(50)-C(54)-Zn(2) | -117.38(15) | C(4A)-C(5A)-C(6A)-C(1A) | 0.8(3)      |
| C(52)-C(53)-C(54)-C(50) | -0.12(16)   | C(6B)-C(1B)-C(2B)-C(3B) | 0(3)        |
| C(58)-C(53)-C(54)-C(50) | -177.63(14) | C(1B)-C(2B)-C(3B)-C(4B) | 1(3)        |
| Zn(2)-C(53)-C(54)-C(50) | 63.09(10)   | C(2B)-C(3B)-C(4B)-C(5B) | 0(2)        |
| C(52)-C(53)-C(54)-C(59) | 179.53(13)  | C(3B)-C(4B)-C(5B)-C(6B) | -1(2)       |
| C(58)-C(53)-C(54)-C(59) | 2.0(2)      | C(2B)-C(1B)-C(6B)-C(5B) | -1(2)       |
| Zn(2)-C(53)-C(54)-C(59) | -117.26(14) | C(4B)-C(5B)-C(6B)-C(1B) | 2(3)        |
| C(52)-C(53)-C(54)-Zn(2) | -63.20(10)  | C(6D)-C(1D)-C(2D)-C(3D) | 1(3)        |
| C(58)-C(53)-C(54)-Zn(2) | 119.28(15)  | C(2D)-C(1D)-C(6D)-C(5D) | 1(3)        |
| C(51)-Zn(2)-C(54)-C(50) | -37.76(8)   | C(6C)-C(1C)-C(2C)-C(3C) | -4.2(16)    |
| C(53)-Zn(2)-C(54)-C(50) | -116.80(12) | C(1C)-C(2C)-C(3C)-C(4C) | 0.9(16)     |
| C(52)-Zn(2)-C(54)-C(50) | -79.48(9)   | C(2C)-C(3C)-C(4C)-C(5C) | 2(2)        |
| Zn(1)-Zn(2)-C(54)-C(50) | 127.60(8)   | C(3C)-C(4C)-C(5C)-C(6C) | -2.1(19)    |
| C(50)-Zn(2)-C(54)-C(53) | 116.80(12)  | C(4C)-C(5C)-C(6C)-C(1C) | -1.2(16)    |
| C(51)-Zn(2)-C(54)-C(53) | 79.04(9)    | C(2C)-C(1C)-C(6C)-C(5C) | 4.4(18)     |
| C(52)-Zn(2)-C(54)-C(53) | 37.32(8)    |                         |             |

---

Symmetry transformations use d to generate equivalent atoms:

X-Ray Crystal Structure of **3**

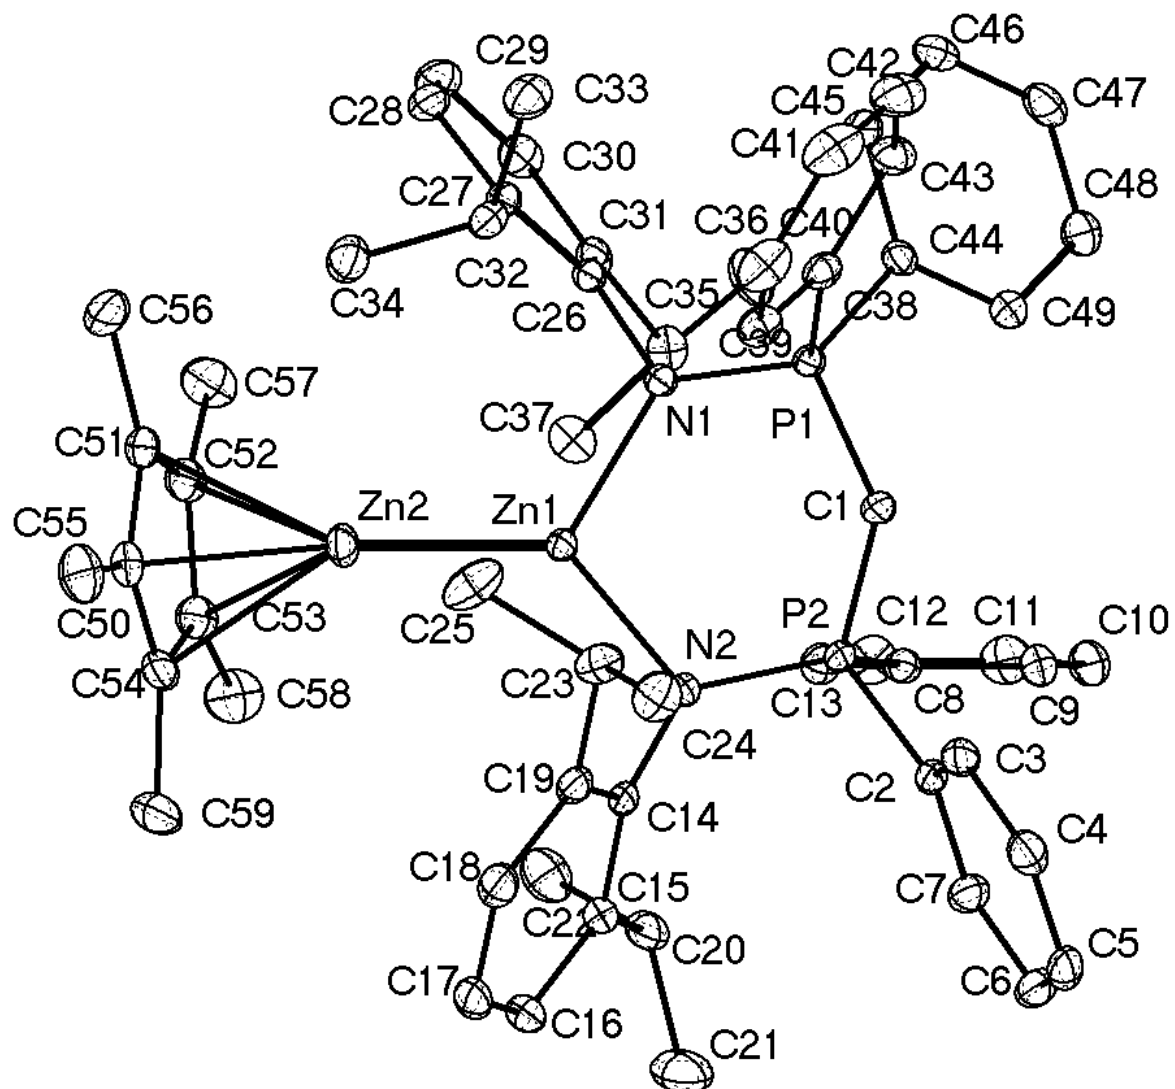

## Computational Studies

DFT calculations were carried out with the Gaussian09 suite of programs (Gaussian 09, Revision A.02, M. J. Frisch, G. W. Trucks, H. B. Schlegel, G. E. Scuseria, M. A. Robb, J. R. Cheeseman, G. Scalmani, V. Barone, B. Mennucci, G. A. Petersson, H. Nakatsuji, M. Caricato, X. Li, H. P. Hratchian, A. F. Izmaylov, J. Bloino, G. Zheng, J. L. Sonnenberg, M. Hada, M. Ehara, K. Toyota, R. Fukuda, J. Hasegawa, M. Ishida, T. Nakajima, Y. Honda, O. Kitao, H. Nakai, T. Vreven, J. A. Montgomery, Jr., J. E. Peralta, F. Ogliaro, M. Bearpark, J. J. Heyd, E. Brothers, K. N. Kudin, V. N. Staroverov, R. Kobayashi, J. Normand, K. Raghavachari, A. Rendell, J. C. Burant, S. S. Iyengar, J. Tomasi, M. Cossi, N. Rega, J. M. Millam, M. Klene, J. E. Knox, J. B. Cross, V. Bakken, C. Adamo, J. Jaramillo, R. Gomperts, R. E. Stratmann, O. Yazyev, A. J. Austin, R. Cammi, C. Pomelli, J. W. Ochterski, R. L. Martin, K. Morokuma, V. G. Zakrzewski, G. A. Voth, P. Salvador, J. J. Dannenberg, S. Dapprich, A. D. Daniels, O. Farkas, J. B. Foresman, J. V. Ortiz, J. Cioslowski, and D. J. Fox, Gaussian, Inc., Wallingford CT, 2009.). The molecular structure and energy of **3** was obtained by performing a complete energy optimization of all geometric parameters at the b3lyp/svp level (input keywords “# b3lyp/svp opt”). A population analysis was carried out with the NBO module as implemented in Gaussian03. The final molecular structure and lists of the final atomic coordinates and energies, selected bond distances, and NBO atomic populations of **3** is given below.

The structures of three heteroleptic and two homoleptic complexes of the types LZn-ZnCp\* (L1 **4**, L2 **2**, L3 **3**) and LZn-ZnL (L1 **1**, L2 **5**) were calculated and the structural parameters are given in the following tables. The central Zn-Zn bond length and NBO's are given below.

| L =            | LZn-ZnCp* |           |           | LZn-ZnL |           |
|----------------|-----------|-----------|-----------|---------|-----------|
|                | Zn-Zn     | NBO ZnCp* | NBO Zn(L) | Zn-Zn   | NBO Zn    |
| L <sup>1</sup> | 2,369     | 0,57      | 0,76      | 2,396   | 0,65/0,68 |
| L <sup>2</sup> | 2,376     | 0,55      | 0,79      | 2,438   | 0,68/0,72 |
| L <sup>3</sup> | 2,381     | 0,57      | 0,76      | -       | -         |

### Calculated Structure and Atom Numbering Scheme of 4

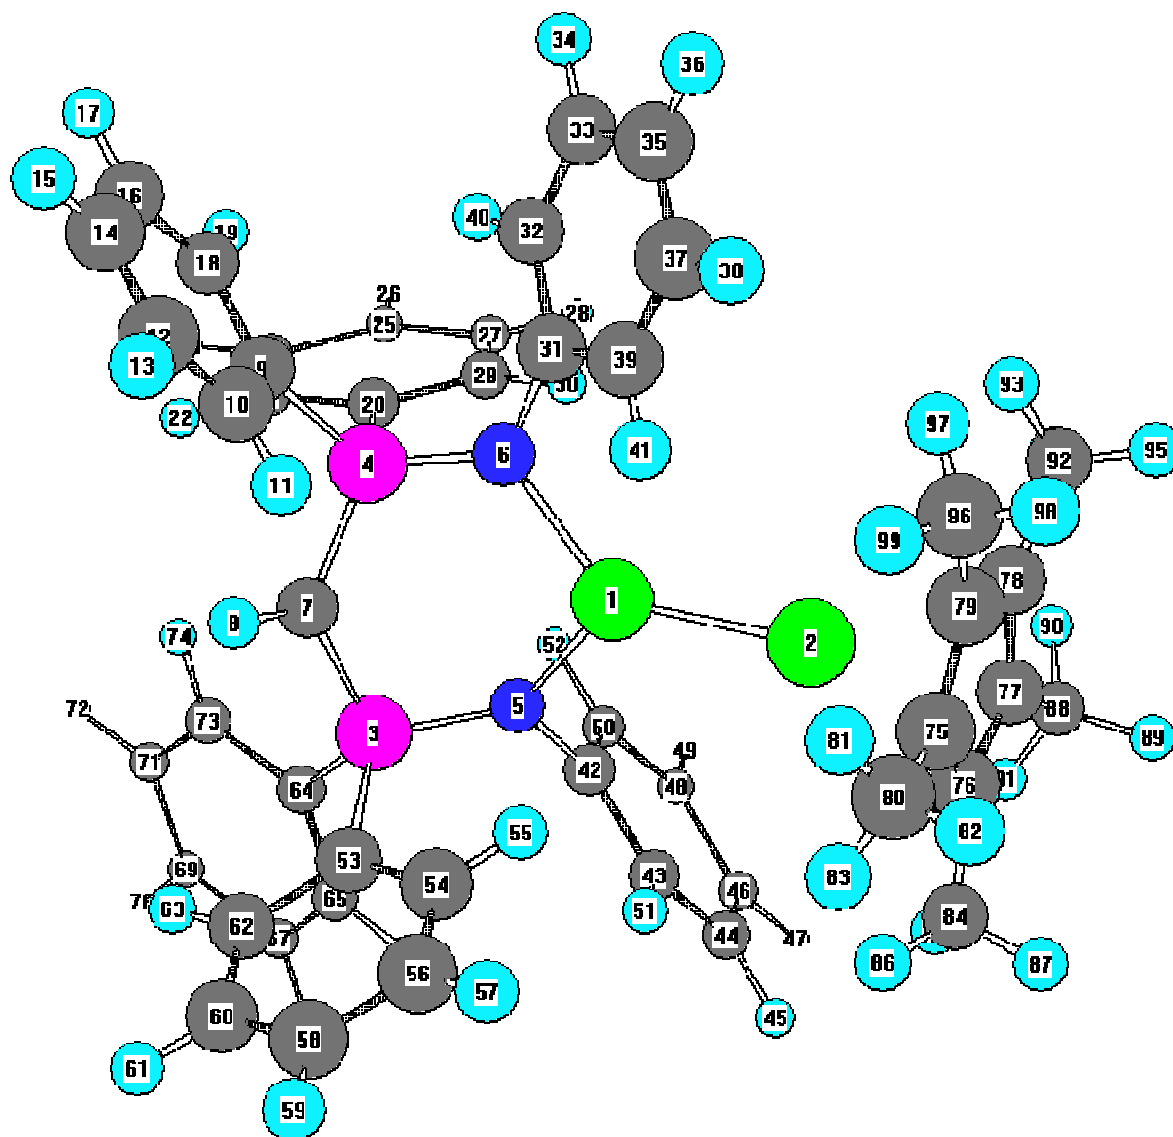

HF=-6167.785034 8\

### Optimized Parameters (Angstroms and Degrees) Compound 4

| Name | Definition | Value  | [1] | Definition | Value    | [1]    |     |
|------|------------|--------|-----|------------|----------|--------|-----|
| R1   | R(1,2)     | 2.3692 | 0.0 | R34        | R(21,23) | 1.3961 | 0.0 |
| R2   | R(1,5)     | 2.0444 | 0.0 | R35        | R(23,24) | 1.0931 | 0.0 |
| R3   | R(1,6)     | 2.0223 | 0.0 | R36        | R(23,25) | 1.3999 | 0.0 |
| R4   | R(2,75)    | 2.3352 | 0.0 | R37        | R(25,26) | 1.0931 | 0.0 |
| R5   | R(2,76)    | 2.3317 | 0.0 | R38        | R(25,27) | 1.3968 | 0.0 |
| R6   | R(2,77)    | 2.3263 | 0.0 | R39        | R(27,28) | 1.0929 | 0.0 |
| R7   | R(2,78)    | 2.3266 | 0.0 | R40        | R(27,29) | 1.3993 | 0.0 |
| R8   | R(2,79)    | 2.333  | 0.0 | R41        | R(29,30) | 1.0918 | 0.0 |
| R9   | R(3,5)     | 1.6448 | 0.0 | R42        | R(31,32) | 1.4118 | 0.0 |
| R10  | R(3,7)     | 1.7233 | 0.0 | R43        | R(31,39) | 1.4133 | 0.0 |
| R11  | R(3,53)    | 1.8489 | 0.0 | R44        | R(32,33) | 1.398  | 0.0 |
| R12  | R(3,64)    | 1.8455 | 0.0 | R45        | R(32,40) | 1.0906 | 0.0 |
| R13  | R(4,6)     | 1.6626 | 0.0 | R46        | R(33,34) | 1.0938 | 0.0 |
| R14  | R(4,7)     | 1.7293 | 0.0 | R47        | R(33,35) | 1.3963 | 0.0 |
| R15  | R(4,9)     | 1.8358 | 0.0 | R48        | R(35,36) | 1.0927 | 0.0 |
| R16  | R(4,20)    | 1.8447 | 0.0 | R49        | R(35,37) | 1.3995 | 0.0 |
| R17  | R(5,42)    | 1.4217 | 0.0 | R50        | R(37,38) | 1.0937 | 0.0 |
| R18  | R(6,31)    | 1.4122 | 0.0 | R51        | R(37,39) | 1.3943 | 0.0 |
| R19  | R(7,8)     | 1.0909 | 0.0 | R52        | R(39,41) | 1.0914 | 0.0 |
| R20  | R(9,10)    | 1.4067 | 0.0 | R53        | R(42,43) | 1.4082 | 0.0 |
| R21  | R(9,18)    | 1.4026 | 0.0 | R54        | R(42,50) | 1.4076 | 0.0 |
| R22  | R(10,11)   | 1.0925 | 0.0 | R55        | R(43,44) | 1.398  | 0.0 |
| R23  | R(10,12)   | 1.3959 | 0.0 | R56        | R(43,51) | 1.0915 | 0.0 |
| R24  | R(12,13)   | 1.0929 | 0.0 | R57        | R(44,45) | 1.0936 | 0.0 |
| R25  | R(12,14)   | 1.3986 | 0.0 | R58        | R(44,46) | 1.3986 | 0.0 |
| R26  | R(14,15)   | 1.093  | 0.0 | R59        | R(46,47) | 1.0929 | 0.0 |
| R27  | R(14,16)   | 1.3969 | 0.0 | R60        | R(46,48) | 1.3985 | 0.0 |
| R28  | R(16,17)   | 1.0929 | 0.0 | R61        | R(48,49) | 1.0935 | 0.0 |
| R29  | R(16,18)   | 1.3984 | 0.0 | R62        | R(48,50) | 1.3969 | 0.0 |
| R30  | R(18,19)   | 1.0912 | 0.0 | R63        | R(50,52) | 1.0922 | 0.0 |
| R31  | R(20,21)   | 1.4063 | 0.0 | R64        | R(53,54) | 1.4042 | 0.0 |
| R32  | R(20,29)   | 1.4026 | 0.0 | R65        | R(53,62) | 1.4042 | 0.0 |
| R33  | R(21,22)   | 1.0929 | 0.0 | R66        | R(54,55) | 1.0935 | 0.0 |
| R67  | R(54,56)   | 1.3971 | 0.0 | R89        | R(76,77) | 1.434  | 0.0 |

|     |          |        |     |      |          |        |     |
|-----|----------|--------|-----|------|----------|--------|-----|
| R68 | R(56,57) | 1.0931 | 0.0 | R90  | R(76,84) | 1.5035 | 0.0 |
| R69 | R(56,58) | 1.3988 | 0.0 | R91  | R(77,78) | 1.4347 | 0.0 |
| R70 | R(58,59) | 1.0931 | 0.0 | R92  | R(77,88) | 1.5038 | 0.0 |
| R71 | R(58,60) | 1.3978 | 0.0 | R93  | R(78,79) | 1.434  | 0.0 |
| R72 | R(60,61) | 1.0932 | 0.0 | R94  | R(78,92) | 1.5039 | 0.0 |
| R73 | R(60,62) | 1.3985 | 0.0 | R95  | R(79,96) | 1.5036 | 0.0 |
| R74 | R(62,63) | 1.0927 | 0.0 | R96  | R(80,81) | 1.1013 | 0.0 |
| R75 | R(64,65) | 1.4071 | 0.0 | R97  | R(80,82) | 1.1061 | 0.0 |
| R76 | R(64,73) | 1.4017 | 0.0 | R98  | R(80,83) | 1.1015 | 0.0 |
| R77 | R(65,66) | 1.0919 | 0.0 | R99  | R(84,85) | 1.1011 | 0.0 |
| R78 | R(65,67) | 1.3962 | 0.0 | R100 | R(84,86) | 1.1014 | 0.0 |
| R79 | R(67,68) | 1.093  | 0.0 | R101 | R(84,87) | 1.1061 | 0.0 |
| R80 | R(67,69) | 1.3995 | 0.0 | R102 | R(88,89) | 1.106  | 0.0 |
| R81 | R(69,70) | 1.0932 | 0.0 | R103 | R(88,90) | 1.1009 | 0.0 |
| R82 | R(69,71) | 1.397  | 0.0 | R104 | R(88,91) | 1.1012 | 0.0 |
| R83 | R(71,72) | 1.0932 | 0.0 | R105 | R(92,93) | 1.1012 | 0.0 |
| R84 | R(71,73) | 1.3988 | 0.0 | R106 | R(92,94) | 1.101  | 0.0 |
| R85 | R(73,74) | 1.0915 | 0.0 | R107 | R(92,95) | 1.106  | 0.0 |
| R86 | R(75,76) | 1.4344 | 0.0 | R108 | R(96,97) | 1.1013 | 0.0 |
| R87 | R(75,79) | 1.4342 | 0.0 | R109 | R(96,98) | 1.1061 | 0.0 |
| R88 | R(75,80) | 1.5038 | 0.0 | R110 | R(96,99) | 1.1013 | 0.0 |

[1] = Derivative Info -DE/DX =

#### Standard Orientation of 4

| Center Number | Atomic Number | Atomic Type | Coordinates(Angstroms) |           |           |
|---------------|---------------|-------------|------------------------|-----------|-----------|
|               |               |             | X                      | Y         | Z         |
| 1             | 30            | 0           | 0.811717               | 0.243544  | -0.010996 |
| 2             | 30            | 0           | 3.176091               | 0.097157  | -0.050074 |
| 3             | 15            | 0           | -1.756626              | -1.504984 | 0.737279  |
| 4             | 15            | 0           | -2.046441              | 1.485321  | 0.116446  |
| 5             | 7             | 0           | -0.431759              | -1.364735 | -0.227241 |
| 6             | 7             | 0           | -0.424006              | 1.843115  | 0.053153  |
| 7             | 6             | 0           | -2.396294              | 0.066170  | 1.040606  |
| 8             | 1             | 0           | -2.867136              | 0.230164  | 2.010850  |
| 9             | 6             | 0           | -2.938946              | 2.853371  | 0.954228  |

|    |   |   |           |           |           |
|----|---|---|-----------|-----------|-----------|
| 10 | 6 | 0 | -2.646880 | 3.064472  | 2.313940  |
| 11 | 1 | 0 | -1.922294 | 2.422703  | 2.820508  |
| 12 | 6 | 0 | -3.270015 | 4.095737  | 3.018730  |
| 13 | 1 | 0 | -3.035662 | 4.248201  | 4.075272  |
| 14 | 6 | 0 | -4.183767 | 4.935271  | 2.373462  |
| 15 | 1 | 0 | -4.669626 | 5.744035  | 2.925285  |
| 16 | 6 | 0 | -4.465447 | 4.742733  | 1.018914  |
| 17 | 1 | 0 | -5.169581 | 5.402321  | 0.505434  |
| 18 | 6 | 0 | -3.843866 | 3.709869  | 0.310166  |
| 19 | 1 | 0 | -4.066678 | 3.579068  | -0.749955 |
| 20 | 6 | 0 | -2.708960 | 1.339932  | -1.599027 |
| 21 | 6 | 0 | -4.081057 | 1.133353  | -1.827705 |
| 22 | 1 | 0 | -4.772829 | 1.091899  | -0.982596 |
| 23 | 6 | 0 | -4.567847 | 0.976840  | -3.126745 |
| 24 | 1 | 0 | -5.637419 | 0.823691  | -3.292258 |
| 25 | 6 | 0 | -3.686633 | 1.004491  | -4.214087 |
| 26 | 1 | 0 | -4.067099 | 0.873731  | -5.230411 |
| 27 | 6 | 0 | -2.320192 | 1.195055  | -3.995792 |
| 28 | 1 | 0 | -1.626011 | 1.212159  | -4.839759 |
| 29 | 6 | 0 | -1.834028 | 1.367205  | -2.694967 |
| 30 | 1 | 0 | -0.766329 | 1.517969  | -2.523627 |
| 31 | 6 | 0 | 0.093805  | 3.145137  | -0.122963 |
| 32 | 6 | 0 | -0.486508 | 4.119360  | -0.963997 |
| 33 | 6 | 0 | 0.077034  | 5.392243  | -1.093039 |
| 34 | 1 | 0 | -0.402084 | 6.122188  | -1.751788 |
| 35 | 6 | 0 | 1.241565  | 5.732472  | -0.401928 |
| 36 | 1 | 0 | 1.681801  | 6.726839  | -0.508442 |
| 37 | 6 | 0 | 1.832708  | 4.776492  | 0.431970  |
| 38 | 1 | 0 | 2.740855  | 5.021951  | 0.989857  |
| 39 | 6 | 0 | 1.267629  | 3.509817  | 0.574578  |
| 40 | 1 | 0 | -1.384031 | 3.880782  | -1.535858 |
| 41 | 1 | 0 | 1.728571  | 2.776298  | 1.238350  |
| 42 | 6 | 0 | 0.064443  | -2.424348 | -1.034865 |
| 43 | 6 | 0 | 1.019836  | -3.338349 | -0.550167 |
| 44 | 6 | 0 | 1.530282  | -4.345316 | -1.374639 |
| 45 | 1 | 0 | 2.268687  | -5.046082 | -0.975093 |



|    |   |   |           |           |           |
|----|---|---|-----------|-----------|-----------|
| 46 | 6 | 0 | 1.103900  | -4.458167 | -2.701884 |
| 47 | 1 | 0 | 1.505266  | -5.244912 | -3.345631 |
| 48 | 6 | 0 | 0.162975  | -3.549901 | -3.197396 |
| 49 | 1 | 0 | -0.175812 | -3.623970 | -4.234491 |
| 50 | 6 | 0 | -0.349201 | -2.543608 | -2.375004 |
| 51 | 1 | 0 | 1.361091  | -3.249813 | 0.482834  |
| 52 | 1 | 0 | -1.082868 | -1.831126 | -2.758544 |
| 53 | 6 | 0 | -1.376316 | -2.257918 | 2.382535  |
| 54 | 6 | 0 | -0.089629 | -2.101847 | 2.922791  |
| 55 | 1 | 0 | 0.686139  | -1.597332 | 2.340188  |
| 56 | 6 | 0 | 0.207956  | -2.592173 | 4.196739  |
| 57 | 1 | 0 | 1.214965  | -2.469463 | 4.603781  |
| 58 | 6 | 0 | -0.779327 | -3.238634 | 4.947686  |
| 59 | 1 | 0 | -0.546353 | -3.622461 | 5.944308  |
| 60 | 6 | 0 | -2.063732 | -3.395271 | 4.418798  |
| 61 | 1 | 0 | -2.838266 | -3.901430 | 5.000963  |
| 62 | 6 | 0 | -2.361014 | -2.911416 | 3.140829  |
| 63 | 1 | 0 | -3.365108 | -3.050320 | 2.732871  |
| 64 | 6 | 0 | -2.964608 | -2.700531 | 0.018058  |
| 65 | 6 | 0 | -2.637337 | -4.058453 | -0.151574 |
| 66 | 1 | 0 | -1.654286 | -4.430939 | 0.143519  |
| 67 | 6 | 0 | -3.567284 | -4.944034 | -0.699581 |
| 68 | 1 | 0 | -3.300551 | -5.995736 | -0.831412 |
| 69 | 6 | 0 | -4.835312 | -4.488503 | -1.077850 |
| 70 | 1 | 0 | -5.562306 | -5.184978 | -1.503990 |
| 71 | 6 | 0 | -5.170767 | -3.143551 | -0.904279 |
| 72 | 1 | 0 | -6.162284 | -2.783635 | -1.191377 |
| 73 | 6 | 0 | -4.238961 | -2.254401 | -0.358628 |
| 74 | 1 | 0 | -4.493515 | -1.203347 | -0.210802 |
| 75 | 6 | 0 | 5.179011  | -0.134428 | 1.128058  |
| 76 | 6 | 0 | 5.090487  | -1.212756 | 0.186270  |
| 77 | 6 | 0 | 5.094235  | -0.650899 | -1.133042 |
| 78 | 6 | 0 | 5.185634  | 0.775312  | -1.006642 |
| 79 | 6 | 0 | 5.238809  | 1.094090  | 0.390482  |
| 80 | 6 | 0 | 5.301582  | -0.274428 | 2.620337  |
| 81 | 1 | 0 | 4.886240  | 0.595249  | 3.153343  |

|    |   |   |          |           |           |
|----|---|---|----------|-----------|-----------|
| 82 | 1 | 0 | 6.357378 | -0.367587 | 2.936627  |
| 83 | 1 | 0 | 4.778326 | -1.167858 | 2.996141  |
| 84 | 6 | 0 | 5.097824 | -2.680010 | 0.514510  |
| 85 | 1 | 0 | 4.536386 | -3.268354 | -0.227883 |
| 86 | 1 | 0 | 4.650716 | -2.885256 | 1.499982  |
| 87 | 1 | 0 | 6.125268 | -3.089032 | 0.539246  |
| 88 | 6 | 0 | 5.103167 | -1.430025 | -2.419276 |
| 89 | 1 | 0 | 6.127462 | -1.734124 | -2.705085 |
| 90 | 1 | 0 | 4.699506 | -0.841945 | -3.257819 |
| 91 | 1 | 0 | 4.502173 | -2.350215 | -2.350372 |
| 92 | 6 | 0 | 5.310920 | 1.760276  | -2.136167 |
| 93 | 1 | 0 | 4.845234 | 2.728387  | -1.894085 |
| 94 | 1 | 0 | 4.835147 | 1.391877  | -3.058158 |
| 95 | 1 | 0 | 6.369443 | 1.965704  | -2.382471 |
| 96 | 6 | 0 | 5.429002 | 2.468908  | 0.968843  |
| 97 | 1 | 0 | 4.935057 | 3.242584  | 0.360384  |
| 98 | 1 | 0 | 6.498942 | 2.742566  | 1.029948  |
| 99 | 1 | 0 | 5.022341 | 2.546985  | 1.989332  |

#### Summary of Natural Population Analysis: Natural Population of 4

| Atom | No | Natural Charge | Core     | Valence  | Rydberg | Total    |
|------|----|----------------|----------|----------|---------|----------|
| Zn   | 1  | 0.76114        | 17.99725 | 11.23771 | 0.00390 | 29.23886 |
| Zn   | 2  | 0.56209        | 17.99801 | 11.43447 | 0.00543 | 29.43791 |
| P    | 3  | 1.82204        | 9.99700  | 3.09487  | 0.08610 | 13.17796 |
| P    | 4  | 1.80275        | 9.99702  | 3.11653  | 0.08370 | 13.19725 |
| N    | 5  | -1.18952       | 1.99937  | 6.17867  | 0.01148 | 8.18952  |
| N    | 6  | -1.17018       | 1.99936  | 6.15827  | 0.01254 | 8.17018  |
| C    | 7  | -1.35892       | 1.99884  | 5.34715  | 0.01294 | 7.35892  |
| H    | 8  | 0.28367        | 0.00000  | 0.71382  | 0.00251 | 0.71633  |
| C    | 9  | -0.36034       | 1.99882  | 4.33709  | 0.02443 | 6.36034  |
| C    | 10 | -0.19207       | 1.99890  | 4.17643  | 0.01674 | 6.19207  |
| H    | 11 | 0.23678        | 0.00000  | 0.75979  | 0.00344 | 0.76322  |
| C    | 12 | -0.21170       | 1.99893  | 4.19724  | 0.01554 | 6.21170  |
| H    | 13 | 0.22733        | 0.00000  | 0.77000  | 0.00267 | 0.77267  |

|   |    |          |         |         |         |         |
|---|----|----------|---------|---------|---------|---------|
| C | 14 | -0.20448 | 1.99893 | 4.19051 | 0.01504 | 6.20448 |
| H | 15 | 0.22546  | 0.00000 | 0.77188 | 0.00266 | 0.77454 |
| C | 16 | -0.21361 | 1.99892 | 4.19913 | 0.01555 | 6.21361 |
| H | 17 | 0.22599  | 0.00000 | 0.77134 | 0.00267 | 0.77401 |
| C | 18 | -0.19897 | 1.99888 | 4.18346 | 0.01664 | 6.19897 |
| H | 19 | 0.23321  | 0.00000 | 0.76383 | 0.00296 | 0.76679 |
| C | 20 | -0.38359 | 1.99879 | 4.35696 | 0.02784 | 6.38359 |
| C | 21 | -0.20788 | 1.99888 | 4.19167 | 0.01732 | 6.20788 |
| H | 22 | 0.23228  | 0.00000 | 0.76469 | 0.00304 | 0.76772 |
| C | 23 | -0.21755 | 1.99891 | 4.20303 | 0.01561 | 6.21755 |
| H | 24 | 0.22590  | 0.00000 | 0.77140 | 0.00270 | 0.77410 |
| C | 25 | -0.20522 | 1.99893 | 4.19114 | 0.01515 | 6.20522 |
| H | 26 | 0.22585  | 0.00000 | 0.77149 | 0.00265 | 0.77415 |
| C | 27 | -0.21553 | 1.99891 | 4.20103 | 0.01559 | 6.21553 |
| H | 28 | 0.22891  | 0.00000 | 0.76844 | 0.00265 | 0.77109 |
| C | 29 | -0.19886 | 1.99887 | 4.18143 | 0.01856 | 6.19886 |
| H | 30 | 0.23974  | 0.00000 | 0.75604 | 0.00422 | 0.76026 |
| C | 31 | 0.18583  | 1.99885 | 3.79361 | 0.02170 | 5.81417 |
| C | 32 | -0.26953 | 1.99889 | 4.25566 | 0.01498 | 6.26953 |
| C | 33 | -0.20901 | 1.99893 | 4.19491 | 0.01517 | 6.20901 |
| H | 34 | 0.21768  | 0.00000 | 0.77949 | 0.00284 | 0.78232 |
| C | 35 | -0.25037 | 1.99892 | 4.23605 | 0.01539 | 6.25037 |
| H | 36 | 0.21831  | 0.00000 | 0.77900 | 0.00269 | 0.78169 |
| C | 37 | -0.21523 | 1.99893 | 4.20118 | 0.01512 | 6.21523 |
| H | 38 | 0.21965  | 0.00000 | 0.77751 | 0.00284 | 0.78035 |
| C | 39 | -0.24347 | 1.99889 | 4.22893 | 0.01565 | 6.24347 |
| H | 40 | 0.21686  | 0.00000 | 0.77974 | 0.00340 | 0.78314 |
| H | 41 | 0.22211  | 0.00000 | 0.77359 | 0.00430 | 0.77789 |
| C | 42 | 0.16818  | 1.99881 | 3.81003 | 0.02298 | 5.83182 |
| C | 43 | -0.24290 | 1.99884 | 4.22828 | 0.01578 | 6.24290 |
| C | 44 | -0.22106 | 1.99893 | 4.20697 | 0.01516 | 6.22106 |
| H | 45 | 0.22198  | 0.00000 | 0.77522 | 0.00280 | 0.77802 |
| C | 46 | -0.23783 | 1.99893 | 4.22373 | 0.01517 | 6.23783 |
| H | 47 | 0.22052  | 0.00000 | 0.77679 | 0.00269 | 0.77948 |
| C | 48 | -0.21469 | 1.99893 | 4.20078 | 0.01498 | 6.21469 |
| H | 49 | 0.22053  | 0.00000 | 0.77665 | 0.00281 | 0.77947 |

|   |    |          |         |         |         |         |
|---|----|----------|---------|---------|---------|---------|
| C | 50 | -0.23049 | 1.99884 | 4.21565 | 0.01600 | 6.23049 |
| H | 51 | 0.22656  | 0.00000 | 0.77021 | 0.00323 | 0.77344 |
| H | 52 | 0.22916  | 0.00000 | 0.76746 | 0.00338 | 0.77084 |
| C | 53 | -0.37643 | 1.99880 | 4.34836 | 0.02927 | 6.37643 |
| C | 54 | -0.19905 | 1.99888 | 4.18247 | 0.01770 | 6.19905 |
| H | 55 | 0.22680  | 0.00000 | 0.76832 | 0.00488 | 0.77320 |
| C | 56 | -0.21483 | 1.99892 | 4.20033 | 0.01558 | 6.21483 |
| H | 57 | 0.22678  | 0.00000 | 0.77053 | 0.00269 | 0.77322 |
| C | 58 | -0.20891 | 1.99893 | 4.19489 | 0.01509 | 6.20891 |
| H | 59 | 0.22487  | 0.00000 | 0.77246 | 0.00266 | 0.77513 |
| C | 60 | -0.21518 | 1.99893 | 4.20060 | 0.01565 | 6.21518 |
| H | 61 | 0.22548  | 0.00000 | 0.77182 | 0.00270 | 0.77452 |
| C | 62 | -0.20420 | 1.99889 | 4.18890 | 0.01641 | 6.20420 |
| H | 63 | 0.23321  | 0.00000 | 0.76394 | 0.00285 | 0.76679 |
| C | 64 | -0.38946 | 1.99880 | 4.36296 | 0.02770 | 6.38946 |
| C | 65 | -0.19212 | 1.99889 | 4.17574 | 0.01749 | 6.19212 |
| H | 66 | 0.23702  | 0.00000 | 0.75989 | 0.00309 | 0.76298 |
| C | 67 | -0.21514 | 1.99892 | 4.20062 | 0.01561 | 6.21514 |
| H | 68 | 0.22641  | 0.00000 | 0.77089 | 0.00270 | 0.77359 |
| C | 69 | -0.20657 | 1.99893 | 4.19257 | 0.01506 | 6.20657 |
| H | 70 | 0.22371  | 0.00000 | 0.77361 | 0.00268 | 0.77629 |
| C | 71 | -0.22048 | 1.99892 | 4.20598 | 0.01559 | 6.22048 |
| H | 72 | 0.22325  | 0.00000 | 0.77401 | 0.00274 | 0.77675 |
| C | 73 | -0.19283 | 1.99887 | 4.17721 | 0.01675 | 6.19283 |
| H | 74 | 0.23612  | 0.00000 | 0.76047 | 0.00341 | 0.76388 |
| C | 75 | -0.16460 | 1.99883 | 4.14135 | 0.02442 | 6.16460 |
| C | 76 | -0.16485 | 1.99883 | 4.14141 | 0.02461 | 6.16485 |
| C | 77 | -0.16260 | 1.99883 | 4.13924 | 0.02453 | 6.16260 |
| C | 78 | -0.16324 | 1.99883 | 4.13991 | 0.02450 | 6.16324 |
| C | 79 | -0.16422 | 1.99883 | 4.14080 | 0.02459 | 6.16422 |
| C | 80 | -0.62807 | 1.99919 | 4.61934 | 0.00953 | 6.62807 |
| H | 81 | 0.21826  | 0.00000 | 0.77931 | 0.00243 | 0.78174 |
| H | 82 | 0.21803  | 0.00000 | 0.77854 | 0.00343 | 0.78197 |
| H | 83 | 0.21633  | 0.00000 | 0.78124 | 0.00243 | 0.78367 |
| C | 84 | -0.62845 | 1.99919 | 4.61972 | 0.00954 | 6.62845 |
| H | 85 | 0.22016  | 0.00000 | 0.77712 | 0.00272 | 0.77984 |

|   |    |          |         |         |         |         |
|---|----|----------|---------|---------|---------|---------|
| H | 86 | 0.21596  | 0.00000 | 0.78162 | 0.00242 | 0.78404 |
| H | 87 | 0.21711  | 0.00000 | 0.77948 | 0.00341 | 0.78289 |
| C | 88 | -0.62970 | 1.99919 | 4.62086 | 0.00965 | 6.62970 |
| H | 89 | 0.21638  | 0.00000 | 0.78028 | 0.00335 | 0.78362 |
| H | 90 | 0.21921  | 0.00000 | 0.77840 | 0.00239 | 0.78079 |
| H | 91 | 0.22325  | 0.00000 | 0.77424 | 0.00252 | 0.77675 |
| C | 92 | -0.62965 | 1.99919 | 4.62082 | 0.00964 | 6.62965 |
| H | 93 | 0.22259  | 0.00000 | 0.77492 | 0.00249 | 0.77741 |
| H | 94 | 0.21898  | 0.00000 | 0.77863 | 0.00239 | 0.78102 |
| H | 95 | 0.21699  | 0.00000 | 0.77964 | 0.00337 | 0.78301 |
| C | 96 | -0.62976 | 1.99919 | 4.62100 | 0.00957 | 6.62976 |
| H | 97 | 0.22136  | 0.00000 | 0.77597 | 0.00267 | 0.77864 |
| H | 98 | 0.21740  | 0.00000 | 0.77921 | 0.00339 | 0.78260 |
| H | 99 | 0.21718  | 0.00000 | 0.78042 | 0.00240 | 0.78282 |

---

\* Total \* 0.00000 153.93702 276.91094 1.15204 432.00000

## Calculated Structure and Atom Numbering Scheme of 2

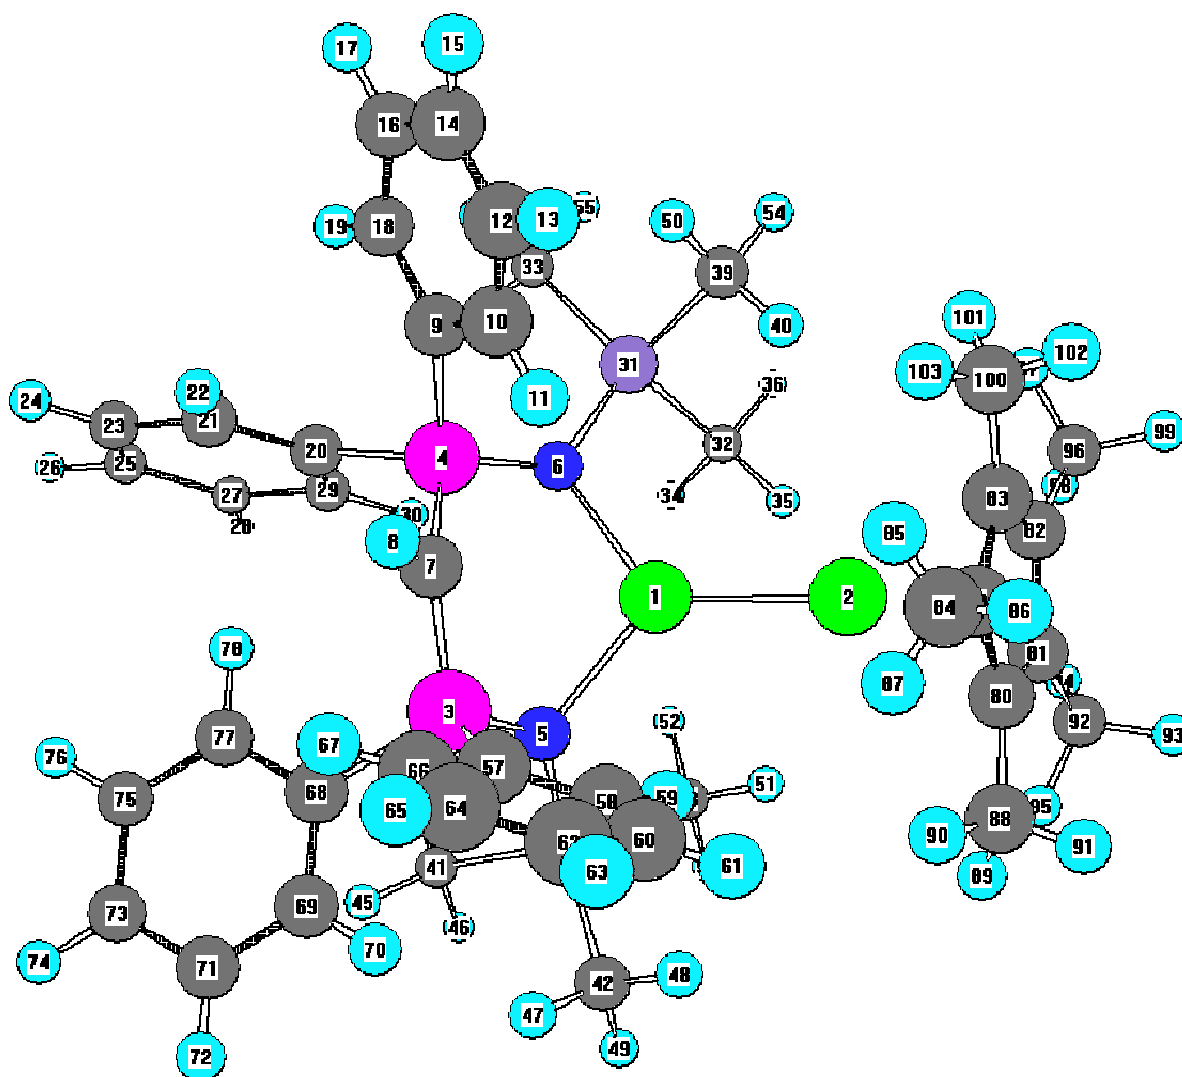

HF=-6523.098

### Optimized Parameters (Angstroms and Degrees) Compound 2

| Name | Definition | Value  | [1] | Definition | Value    | [1]    |     |
|------|------------|--------|-----|------------|----------|--------|-----|
| R1   | R(1,2)     | 2.3759 | 0.0 | R41        | R(23,24) | 1.0932 | 0.0 |
| R2   | R(1,5)     | 2.0695 | 0.0 | R42        | R(23,25) | 1.4001 | 0.0 |
| R3   | R(1,6)     | 2.0578 | 0.0 | R43        | R(25,26) | 1.0931 | 0.0 |
| R4   | R(1,43)    | 3.3387 | 0.0 | R44        | R(25,27) | 1.3972 | 0.0 |
| R5   | R(1,51)    | 3.0801 | 0.0 | R45        | R(27,28) | 1.0931 | 0.0 |
| R6   | R(2,43)    | 4.273  | 0.0 | R46        | R(27,29) | 1.399  | 0.0 |
| R7   | R(2,51)    | 3.4102 | 0.0 | R47        | R(29,30) | 1.0915 | 0.0 |
| R8   | R(2,79)    | 2.3425 | 0.0 | R48        | R(31,32) | 1.8907 | 0.0 |
| R9   | R(2,80)    | 2.3385 | 0.0 | R49        | R(31,33) | 1.8953 | 0.0 |
| R10  | R(2,81)    | 2.3361 | 0.0 | R50        | R(31,39) | 1.8915 | 0.0 |
| R11  | R(2,82)    | 2.3406 | 0.0 | R51        | R(31,40) | 2.4995 | 0.0 |
| R12  | R(2,83)    | 2.3455 | 0.0 | R52        | R(31,50) | 2.5121 | 0.0 |
| R13  | R(3,5)     | 1.6261 | 0.0 | R53        | R(31,54) | 2.511  | 0.0 |
| R14  | R(3,7)     | 1.7351 | 0.0 | R54        | R(32,33) | 3.0628 | 0.0 |
| R15  | R(3,56)    | 3.1067 | 0.0 | R55        | R(32,34) | 1.1027 | 0.0 |
| R16  | R(3,57)    | 1.8462 | 0.0 | R56        | R(32,35) | 1.1022 | 0.0 |
| R17  | R(3,68)    | 1.8506 | 0.0 | R57        | R(32,36) | 1.1031 | 0.0 |
| R18  | R(4,6)     | 1.6305 | 0.0 | R58        | R(33,34) | 3.2845 | 0.0 |
| R19  | R(4,7)     | 1.7423 | 0.0 | R59        | R(33,37) | 1.1013 | 0.0 |
| R20  | R(4,9)     | 1.8474 | 0.0 | R60        | R(33,38) | 1.1013 | 0.0 |
| R21  | R(4,20)    | 1.851  | 0.0 | R61        | R(33,55) | 1.1037 | 0.0 |
| R22  | R(5,56)    | 1.7563 | 0.0 | R62        | R(39,40) | 1.102  | 0.0 |
| R23  | R(6,31)    | 1.7607 | 0.0 | R63        | R(39,50) | 1.1022 | 0.0 |
| R24  | R(7,8)     | 1.0926 | 0.0 | R64        | R(39,54) | 1.1034 | 0.0 |
| R25  | R(9,10)    | 1.4065 | 0.0 | R65        | R(41,44) | 1.1024 | 0.0 |
| R26  | R(9,18)    | 1.4048 | 0.0 | R66        | R(41,45) | 1.1008 | 0.0 |
| R27  | R(9,37)    | 3.4858 | 0.0 | R67        | R(41,46) | 1.1037 | 0.0 |
| R28  | R(10,11)   | 1.0922 | 0.0 | R68        | R(41,56) | 1.8928 | 0.0 |
| R29  | R(10,12)   | 1.3966 | 0.0 | R69        | R(42,47) | 1.1018 | 0.0 |
| R30  | R(12,13)   | 1.093  | 0.0 | R70        | R(42,48) | 1.1025 | 0.0 |
| R31  | R(12,14)   | 1.3987 | 0.0 | R71        | R(42,49) | 1.1035 | 0.0 |
| R32  | R(14,15)   | 1.0931 | 0.0 | R72        | R(42,56) | 1.8951 | 0.0 |
| R33  | R(14,16)   | 1.3973 | 0.0 | R73        | R(43,51) | 1.102  | 0.0 |
| R34  | R(16,17)   | 1.093  | 0.0 | R74        | R(43,52) | 1.1029 | 0.0 |
| R35  | R(16,18)   | 1.3986 | 0.0 | R75        | R(43,53) | 1.1031 | 0.0 |
| R36  | R(18,19)   | 1.0915 | 0.0 | R76        | R(43,56) | 1.8909 | 0.0 |
| R37  | R(20,21)   | 1.407  | 0.0 | R77        | R(57,58) | 1.402  | 0.0 |
| R38  | R(20,29)   | 1.4031 | 0.0 | R78        | R(57,66) | 1.4054 | 0.0 |
| R39  | R(21,22)   | 1.093  | 0.0 | R79        | R(58,59) | 1.0921 | 0.0 |
| R40  | R(21,23)   | 1.3968 | 0.0 | R80        | R(58,60) | 1.399  | 0.0 |

|      |          |        |     |      |            |        |     |
|------|----------|--------|-----|------|------------|--------|-----|
| R81  | R(60,61) | 1.0931 | 0.0 | R103 | R(80,88)   | 1.5039 | 0.0 |
| R82  | R(60,62) | 1.3975 | 0.0 | R104 | R(81,82)   | 1.4343 | 0.0 |
| R83  | R(62,63) | 1.0931 | 0.0 | R105 | R(81,92)   | 1.5041 | 0.0 |
| R84  | R(62,64) | 1.3993 | 0.0 | R106 | R(82,83)   | 1.4338 | 0.0 |
| R85  | R(64,65) | 1.0932 | 0.0 | R107 | R(82,96)   | 1.5039 | 0.0 |
| R86  | R(64,66) | 1.397  | 0.0 | R108 | R(83,100)  | 1.504  | 0.0 |
| R87  | R(66,67) | 1.0935 | 0.0 | R109 | R(84,85)   | 1.101  | 0.0 |
| R88  | R(68,69) | 1.4063 | 0.0 | R110 | R(84,86)   | 1.1061 | 0.0 |
| R89  | R(68,77) | 1.4031 | 0.0 | R111 | R(84,87)   | 1.1012 | 0.0 |
| R90  | R(69,70) | 1.0924 | 0.0 | R112 | R(88,89)   | 1.1013 | 0.0 |
| R91  | R(69,71) | 1.3974 | 0.0 | R113 | R(88,90)   | 1.1015 | 0.0 |
| R92  | R(71,72) | 1.0932 | 0.0 | R114 | R(88,91)   | 1.1061 | 0.0 |
| R93  | R(71,73) | 1.3988 | 0.0 | R115 | R(92,93)   | 1.1061 | 0.0 |
| R94  | R(73,74) | 1.0932 | 0.0 | R116 | R(92,94)   | 1.1013 | 0.0 |
| R95  | R(73,75) | 1.3979 | 0.0 | R117 | R(92,95)   | 1.1012 | 0.0 |
| R96  | R(75,76) | 1.093  | 0.0 | R118 | R(96,97)   | 1.1011 | 0.0 |
| R97  | R(75,77) | 1.3978 | 0.0 | R119 | R(96,98)   | 1.1011 | 0.0 |
| R98  | R(77,78) | 1.0905 | 0.0 | R120 | R(96,99)   | 1.106  | 0.0 |
| R99  | R(79,80) | 1.434  | 0.0 | R121 | R(100,101) | 1.1011 | 0.0 |
| R100 | R(79,83) | 1.4337 | 0.0 | R122 | R(100,102) | 1.106  | 0.0 |
| R101 | R(79,84) | 1.5037 | 0.0 | R123 | R(100,103) | 1.1011 | 0.0 |
| R102 | R(80,81) | 1.4342 | 0.0 |      |            |        |     |

[1] = Derivative Info -DE/DX =

### Standard Orientation of 2

| Center Number | Atomic Number | Atomic Type | Coordinates(Angstroms) |           |           |
|---------------|---------------|-------------|------------------------|-----------|-----------|
|               |               |             | X                      | Y         | Z         |
| 1             | 30            | 0           | 0.726440               | 0.069592  | -0.576360 |
| 2             | 30            | 0           | 3.084408               | -0.038346 | -0.305954 |
| 3             | 15            | 0           | -1.493961              | -1.558643 | 0.548252  |
| 4             | 15            | 0           | -1.681705              | 1.563260  | 0.420043  |
| 5             | 7             | 0           | -0.610846              | -1.491534 | -0.815551 |
| 6             | 7             | 0           | -0.499497              | 1.718340  | -0.692173 |
| 7             | 6             | 0           | -1.626937              | 0.026961  | 1.240058  |
| 8             | 1             | 0           | -1.900930              | 0.058419  | 2.297300  |
| 9             | 6             | 0           | -1.552312              | 2.815061  | 1.772483  |
| 10            | 6             | 0           | -0.646798              | 2.572970  | 2.821195  |
| 11            | 1             | 0           | -0.103492              | 1.626034  | 2.853885  |
| 12            | 6             | 0           | -0.433578              | 3.534594  | 3.811355  |
| 13            | 1             | 0           | 0.270995               | 3.330235  | 4.621624  |



|    |    |   |           |           |           |
|----|----|---|-----------|-----------|-----------|
| 14 | 6  | 0 | -1.113716 | 4.755853  | 3.764096  |
| 15 | 1  | 0 | -0.944823 | 5.508792  | 4.538297  |
| 16 | 6  | 0 | -2.006515 | 5.011157  | 2.719922  |
| 17 | 1  | 0 | -2.538978 | 5.964606  | 2.673538  |
| 18 | 6  | 0 | -2.223562 | 4.048337  | 1.729025  |
| 19 | 1  | 0 | -2.924064 | 4.264787  | 0.920423  |
| 20 | 6  | 0 | -3.319268 | 1.879064  | -0.382871 |
| 21 | 6  | 0 | -4.484638 | 2.076374  | 0.380506  |
| 22 | 1  | 0 | -4.423256 | 2.132945  | 1.470352  |
| 23 | 6  | 0 | -5.730036 | 2.191551  | -0.241329 |
| 24 | 1  | 0 | -6.625872 | 2.354446  | 0.363743  |
| 25 | 6  | 0 | -5.832433 | 2.092990  | -1.634153 |
| 26 | 1  | 0 | -6.807715 | 2.180395  | -2.119949 |
| 27 | 6  | 0 | -4.683045 | 1.878459  | -2.399116 |
| 28 | 1  | 0 | -4.756336 | 1.792190  | -3.486356 |
| 29 | 6  | 0 | -3.434108 | 1.774776  | -1.777332 |
| 30 | 1  | 0 | -2.534180 | 1.598590  | -2.369280 |
| 31 | 14 | 0 | 0.188421  | 3.147031  | -1.457451 |
| 32 | 6  | 0 | 1.037652  | 2.574341  | -3.046670 |
| 33 | 6  | 0 | -1.086867 | 4.470800  | -1.919410 |
| 34 | 1  | 0 | 0.315421  | 2.136348  | -3.755594 |
| 35 | 1  | 0 | 1.807407  | 1.814430  | -2.834884 |
| 36 | 1  | 0 | 1.533543  | 3.420602  | -3.551364 |
| 37 | 1  | 0 | -1.609225 | 4.875627  | -1.038481 |
| 38 | 1  | 0 | -1.848800 | 4.098290  | -2.621872 |
| 39 | 6  | 0 | 1.477310  | 3.950262  | -0.329873 |
| 40 | 1  | 0 | 2.247805  | 3.216621  | -0.042602 |
| 41 | 6  | 0 | -2.260138 | -2.480721 | -3.169847 |
| 42 | 6  | 0 | -0.030502 | -4.238311 | -1.981836 |
| 43 | 6  | 0 | 0.666071  | -1.638374 | -3.444476 |
| 44 | 1  | 0 | -2.638526 | -1.457305 | -3.327434 |
| 45 | 1  | 0 | -3.025413 | -3.037486 | -2.607611 |
| 46 | 1  | 0 | -2.154720 | -2.959002 | -4.158880 |
| 47 | 1  | 0 | -0.722888 | -4.778771 | -1.316731 |
| 48 | 1  | 0 | 0.971454  | -4.274297 | -1.523264 |
| 49 | 1  | 0 | 0.015628  | -4.795946 | -2.932971 |
| 50 | 1  | 0 | 1.017403  | 4.334223  | 0.595310  |
| 51 | 1  | 0 | 1.670257  | -1.590326 | -2.993161 |
| 52 | 1  | 0 | 0.367966  | -0.609897 | -3.708624 |
| 53 | 1  | 0 | 0.746006  | -2.210972 | -4.383974 |
| 54 | 1  | 0 | 1.978214  | 4.794244  | -0.834165 |
| 55 | 1  | 0 | -0.566469 | 5.313811  | -2.405892 |

|    |    |   |           |           |           |
|----|----|---|-----------|-----------|-----------|
| 56 | 14 | 0 | -0.586902 | -2.452332 | -2.285539 |
| 57 | 6  | 0 | -0.702856 | -2.591973 | 1.857773  |
| 58 | 6  | 0 | 0.631639  | -2.994330 | 1.706939  |
| 59 | 1  | 0 | 1.173352  | -2.722041 | 0.798561  |
| 60 | 6  | 0 | 1.266882  | -3.725956 | 2.716053  |
| 61 | 1  | 0 | 2.305840  | -4.039618 | 2.585604  |
| 62 | 6  | 0 | 0.576951  | -4.054937 | 3.885994  |
| 63 | 1  | 0 | 1.074400  | -4.626292 | 4.674008  |
| 64 | 6  | 0 | -0.753755 | -3.652599 | 4.045252  |
| 65 | 1  | 0 | -1.298323 | -3.908817 | 4.957895  |
| 66 | 6  | 0 | -1.391985 | -2.928293 | 3.035483  |
| 67 | 1  | 0 | -2.436470 | -2.631589 | 3.164928  |
| 68 | 6  | 0 | -3.100824 | -2.435517 | 0.276254  |
| 69 | 6  | 0 | -3.178949 | -3.839406 | 0.302714  |
| 70 | 1  | 0 | -2.293435 | -4.433580 | 0.539490  |
| 71 | 6  | 0 | -4.387734 | -4.488389 | 0.037495  |
| 72 | 1  | 0 | -4.434309 | -5.580276 | 0.062231  |
| 73 | 6  | 0 | -5.535194 | -3.743211 | -0.253659 |
| 74 | 1  | 0 | -6.481004 | -4.251372 | -0.459200 |
| 75 | 6  | 0 | -5.468969 | -2.347019 | -0.272185 |
| 76 | 1  | 0 | -6.362088 | -1.756473 | -0.491638 |
| 77 | 6  | 0 | -4.260467 | -1.697373 | -0.005148 |
| 78 | 1  | 0 | -4.218376 | -0.607731 | -0.011739 |
| 79 | 6  | 0 | 4.878238  | -0.484488 | 1.132918  |
| 80 | 6  | 0 | 5.001260  | -1.344267 | -0.008083 |
| 81 | 6  | 0 | 5.202939  | -0.520126 | -1.164386 |
| 82 | 6  | 0 | 5.206929  | 0.848962  | -0.736972 |
| 83 | 6  | 0 | 5.007362  | 0.870546  | 0.682757  |
| 84 | 6  | 0 | 4.745308  | -0.929959 | 2.562983  |
| 85 | 1  | 0 | 4.235519  | -0.176102 | 3.182682  |
| 86 | 1  | 0 | 5.731894  | -1.113271 | 3.028169  |
| 87 | 1  | 0 | 4.169972  | -1.864512 | 2.654220  |
| 88 | 6  | 0 | 5.031406  | -2.847577 | 0.019802  |
| 89 | 1  | 0 | 4.656121  | -3.287689 | -0.917354 |
| 90 | 1  | 0 | 4.421132  | -3.256972 | 0.840300  |
| 91 | 1  | 0 | 6.058042  | -3.232802 | 0.164739  |
| 92 | 6  | 0 | 5.483773  | -1.008598 | -2.559003 |
| 93 | 1  | 0 | 6.567357  | -1.149047 | -2.730923 |
| 94 | 1  | 0 | 5.129580  | -0.301042 | -3.324960 |
| 95 | 1  | 0 | 5.001837  | -1.977442 | -2.763297 |
| 96 | 6  | 0 | 5.487288  | 2.043434  | -1.606638 |
| 97 | 1  | 0 | 4.984319  | 2.950474  | -1.236950 |

|     |   |   |          |          |           |
|-----|---|---|----------|----------|-----------|
| 98  | 1 | 0 | 5.153175 | 1.886026 | -2.644001 |
| 99  | 1 | 0 | 6.568667 | 2.271530 | -1.649838 |
| 100 | 6 | 0 | 5.040067 | 2.092809 | 1.558600  |
| 101 | 1 | 0 | 4.670572 | 2.987606 | 1.034015  |
| 102 | 1 | 0 | 6.066815 | 2.322640 | 1.899516  |
| 103 | 1 | 0 | 4.424334 | 1.969412 | 2.463067  |

### Summary of Natural Population Analysis: Natural Population of 2

| Atom | No | Natural Charge | Core     | Valence  | Rydberg | Total    |
|------|----|----------------|----------|----------|---------|----------|
| Zn   | 1  | 0.79065        | 17.99711 | 11.20795 | 0.00429 | 29.20935 |
| Zn   | 2  | 0.55214        | 17.99798 | 11.44424 | 0.00564 | 29.44786 |
| P    | 3  | 1.83559        | 9.99707  | 3.08389  | 0.08345 | 13.16441 |
| P    | 4  | 1.83079        | 9.99707  | 3.08915  | 0.08299 | 13.16921 |
| N    | 5  | -1.60826       | 1.99947  | 6.60197  | 0.00683 | 8.60826  |
| N    | 6  | -1.60711       | 1.99948  | 6.60054  | 0.00709 | 8.60711  |
| C    | 7  | -1.37375       | 1.99890  | 5.36198  | 0.01287 | 7.37375  |
| H    | 8  | 0.27928        | 0.00000  | 0.71806  | 0.00267 | 0.72072  |
| C    | 9  | -0.37307       | 1.99882  | 4.34903  | 0.02522 | 6.37307  |
| C    | 10 | -0.19510       | 1.99890  | 4.17892  | 0.01728 | 6.19510  |
| H    | 11 | 0.24179        | 0.00000  | 0.75460  | 0.00360 | 0.75821  |
| C    | 12 | -0.21445       | 1.99892  | 4.20004  | 0.01549 | 6.21445  |
| H    | 13 | 0.22718        | 0.00000  | 0.77015  | 0.00268 | 0.77282  |
| C    | 14 | -0.20677       | 1.99893  | 4.19272  | 0.01511 | 6.20677  |
| H    | 15 | 0.22549        | 0.00000  | 0.77184  | 0.00266 | 0.77451  |
| C    | 16 | -0.21608       | 1.99892  | 4.20151  | 0.01565 | 6.21608  |
| H    | 17 | 0.22641        | 0.00000  | 0.77091  | 0.00268 | 0.77359  |
| C    | 18 | -0.21032       | 1.99890  | 4.19450  | 0.01692 | 6.21032  |
| H    | 19 | 0.23441        | 0.00000  | 0.76255  | 0.00304 | 0.76559  |
| C    | 20 | -0.38560       | 1.99879  | 4.35983  | 0.02697 | 6.38560  |
| C    | 21 | -0.21370       | 1.99887  | 4.19806  | 0.01677 | 6.21370  |
| H    | 22 | 0.23298        | 0.00000  | 0.76409  | 0.00294 | 0.76702  |
| C    | 23 | -0.22016       | 1.99892  | 4.20552  | 0.01573 | 6.22016  |
| H    | 24 | 0.22604        | 0.00000  | 0.77126  | 0.00271 | 0.77396  |
| C    | 25 | -0.21332       | 1.99893  | 4.19914  | 0.01525 | 6.21332  |
| H    | 26 | 0.22512        | 0.00000  | 0.77222  | 0.00266 | 0.77488  |
| C    | 27 | -0.21419       | 1.99892  | 4.19972  | 0.01555 | 6.21419  |
| H    | 28 | 0.22705        | 0.00000  | 0.77028  | 0.00267 | 0.77295  |
| C    | 29 | -0.20189       | 1.99888  | 4.18498  | 0.01804 | 6.20189  |
| H    | 30 | 0.23981        | 0.00000  | 0.75627  | 0.00392 | 0.76019  |

|    |    |          |         |         |         |          |
|----|----|----------|---------|---------|---------|----------|
| Si | 31 | 1.89467  | 9.99767 | 2.05989 | 0.04777 | 12.10533 |
| C  | 32 | -1.16035 | 1.99914 | 5.14807 | 0.01313 | 7.16035  |
| C  | 33 | -1.15854 | 1.99913 | 5.14626 | 0.01314 | 7.15854  |
| H  | 34 | 0.23566  | 0.00000 | 0.76230 | 0.00203 | 0.76434  |
| H  | 35 | 0.23851  | 0.00000 | 0.75837 | 0.00312 | 0.76149  |
| H  | 36 | 0.23979  | 0.00000 | 0.75843 | 0.00179 | 0.76021  |
| H  | 37 | 0.23367  | 0.00000 | 0.76427 | 0.00206 | 0.76633  |
| H  | 38 | 0.23767  | 0.00000 | 0.76040 | 0.00193 | 0.76233  |
| C  | 39 | -1.16274 | 1.99912 | 5.14985 | 0.01378 | 7.16274  |
| H  | 40 | 0.23792  | 0.00000 | 0.75898 | 0.00310 | 0.76208  |
| C  | 41 | -1.16029 | 1.99913 | 5.14789 | 0.01328 | 7.16029  |
| C  | 42 | -1.16136 | 1.99913 | 5.14830 | 0.01393 | 7.16136  |
| C  | 43 | -1.16465 | 1.99917 | 5.15276 | 0.01272 | 7.16465  |
| H  | 44 | 0.23716  | 0.00000 | 0.76061 | 0.00223 | 0.76284  |
| H  | 45 | 0.24055  | 0.00000 | 0.75686 | 0.00259 | 0.75945  |
| H  | 46 | 0.23576  | 0.00000 | 0.76235 | 0.00189 | 0.76424  |
| H  | 47 | 0.23242  | 0.00000 | 0.76555 | 0.00203 | 0.76758  |
| H  | 48 | 0.23744  | 0.00000 | 0.76055 | 0.00201 | 0.76256  |
| H  | 49 | 0.23749  | 0.00000 | 0.76061 | 0.00191 | 0.76251  |
| H  | 50 | 0.23998  | 0.00000 | 0.75781 | 0.00220 | 0.76002  |
| H  | 51 | 0.23956  | 0.00000 | 0.75733 | 0.00311 | 0.76044  |
| H  | 52 | 0.23645  | 0.00000 | 0.76121 | 0.00234 | 0.76355  |
| H  | 53 | 0.24148  | 0.00000 | 0.75674 | 0.00178 | 0.75852  |
| H  | 54 | 0.23503  | 0.00000 | 0.76312 | 0.00185 | 0.76497  |
| H  | 55 | 0.24014  | 0.00000 | 0.75796 | 0.00190 | 0.75986  |
| Si | 56 | 1.90546  | 9.99766 | 2.04992 | 0.04695 | 12.09454 |
| C  | 57 | -0.37534 | 1.99881 | 4.34752 | 0.02901 | 6.37534  |
| C  | 58 | -0.19765 | 1.99887 | 4.18102 | 0.01776 | 6.19765  |
| H  | 59 | 0.23626  | 0.00000 | 0.75850 | 0.00524 | 0.76374  |
| C  | 60 | -0.21588 | 1.99892 | 4.20136 | 0.01561 | 6.21588  |
| H  | 61 | 0.22501  | 0.00000 | 0.77227 | 0.00271 | 0.77499  |
| C  | 62 | -0.21073 | 1.99893 | 4.19667 | 0.01513 | 6.21073  |
| H  | 63 | 0.22432  | 0.00000 | 0.77302 | 0.00267 | 0.77568  |
| C  | 64 | -0.21693 | 1.99892 | 4.20233 | 0.01568 | 6.21693  |
| H  | 65 | 0.22471  | 0.00000 | 0.77259 | 0.00270 | 0.77529  |
| C  | 66 | -0.20735 | 1.99889 | 4.19197 | 0.01649 | 6.20735  |
| H  | 67 | 0.22992  | 0.00000 | 0.76740 | 0.00268 | 0.77008  |
| C  | 68 | -0.38421 | 1.99881 | 4.35841 | 0.02699 | 6.38421  |
| C  | 69 | -0.20857 | 1.99890 | 4.19268 | 0.01699 | 6.20857  |
| H  | 70 | 0.23283  | 0.00000 | 0.76413 | 0.00304 | 0.76717  |
| C  | 71 | -0.21823 | 1.99891 | 4.20360 | 0.01571 | 6.21823  |
| H  | 72 | 0.22591  | 0.00000 | 0.77138 | 0.00271 | 0.77409  |

|   |     |          |         |         |         |         |
|---|-----|----------|---------|---------|---------|---------|
| C | 73  | -0.20959 | 1.99893 | 4.19557 | 0.01509 | 6.20959 |
| H | 74  | 0.22423  | 0.00000 | 0.77309 | 0.00267 | 0.77577 |
| C | 75  | -0.21565 | 1.99892 | 4.20116 | 0.01557 | 6.21565 |
| H | 76  | 0.22575  | 0.00000 | 0.77146 | 0.00278 | 0.77425 |
| C | 77  | -0.18618 | 1.99886 | 4.17029 | 0.01703 | 6.18618 |
| H | 78  | 0.23145  | 0.00000 | 0.76275 | 0.00580 | 0.76855 |
| C | 79  | -0.16236 | 1.99883 | 4.13919 | 0.02434 | 6.16236 |
| C | 80  | -0.16511 | 1.99883 | 4.14172 | 0.02456 | 6.16511 |
| C | 81  | -0.16450 | 1.99883 | 4.14123 | 0.02445 | 6.16450 |
| C | 82  | -0.16304 | 1.99883 | 4.13971 | 0.02450 | 6.16304 |
| C | 83  | -0.16184 | 1.99883 | 4.13866 | 0.02436 | 6.16184 |
| C | 84  | -0.62751 | 1.99919 | 4.61875 | 0.00957 | 6.62751 |
| H | 85  | 0.21949  | 0.00000 | 0.77809 | 0.00242 | 0.78051 |
| H | 86  | 0.21705  | 0.00000 | 0.77957 | 0.00338 | 0.78295 |
| H | 87  | 0.21677  | 0.00000 | 0.78061 | 0.00261 | 0.78323 |
| C | 88  | -0.62722 | 1.99919 | 4.61852 | 0.00951 | 6.62722 |
| H | 89  | 0.21932  | 0.00000 | 0.77826 | 0.00242 | 0.78068 |
| H | 90  | 0.21415  | 0.00000 | 0.78334 | 0.00251 | 0.78585 |
| H | 91  | 0.21830  | 0.00000 | 0.77830 | 0.00340 | 0.78170 |
| C | 92  | -0.62940 | 1.99919 | 4.62069 | 0.00951 | 6.62940 |
| H | 93  | 0.21781  | 0.00000 | 0.77878 | 0.00341 | 0.78219 |
| H | 94  | 0.22014  | 0.00000 | 0.77747 | 0.00239 | 0.77986 |
| H | 95  | 0.21886  | 0.00000 | 0.77874 | 0.00240 | 0.78114 |
| C | 96  | -0.62926 | 1.99919 | 4.62058 | 0.00949 | 6.62926 |
| H | 97  | 0.22014  | 0.00000 | 0.77742 | 0.00245 | 0.77986 |
| H | 98  | 0.21951  | 0.00000 | 0.77809 | 0.00240 | 0.78049 |
| H | 99  | 0.21753  | 0.00000 | 0.77910 | 0.00337 | 0.78247 |
| C | 100 | -0.62905 | 1.99919 | 4.62040 | 0.00946 | 6.62905 |
| H | 101 | 0.22031  | 0.00000 | 0.77721 | 0.00247 | 0.77969 |
| H | 102 | 0.21758  | 0.00000 | 0.77908 | 0.00335 | 0.78242 |
| H | 103 | 0.21843  | 0.00000 | 0.77915 | 0.00242 | 0.78157 |

---

### Calculated Structure and Atom Numbering Scheme of 3

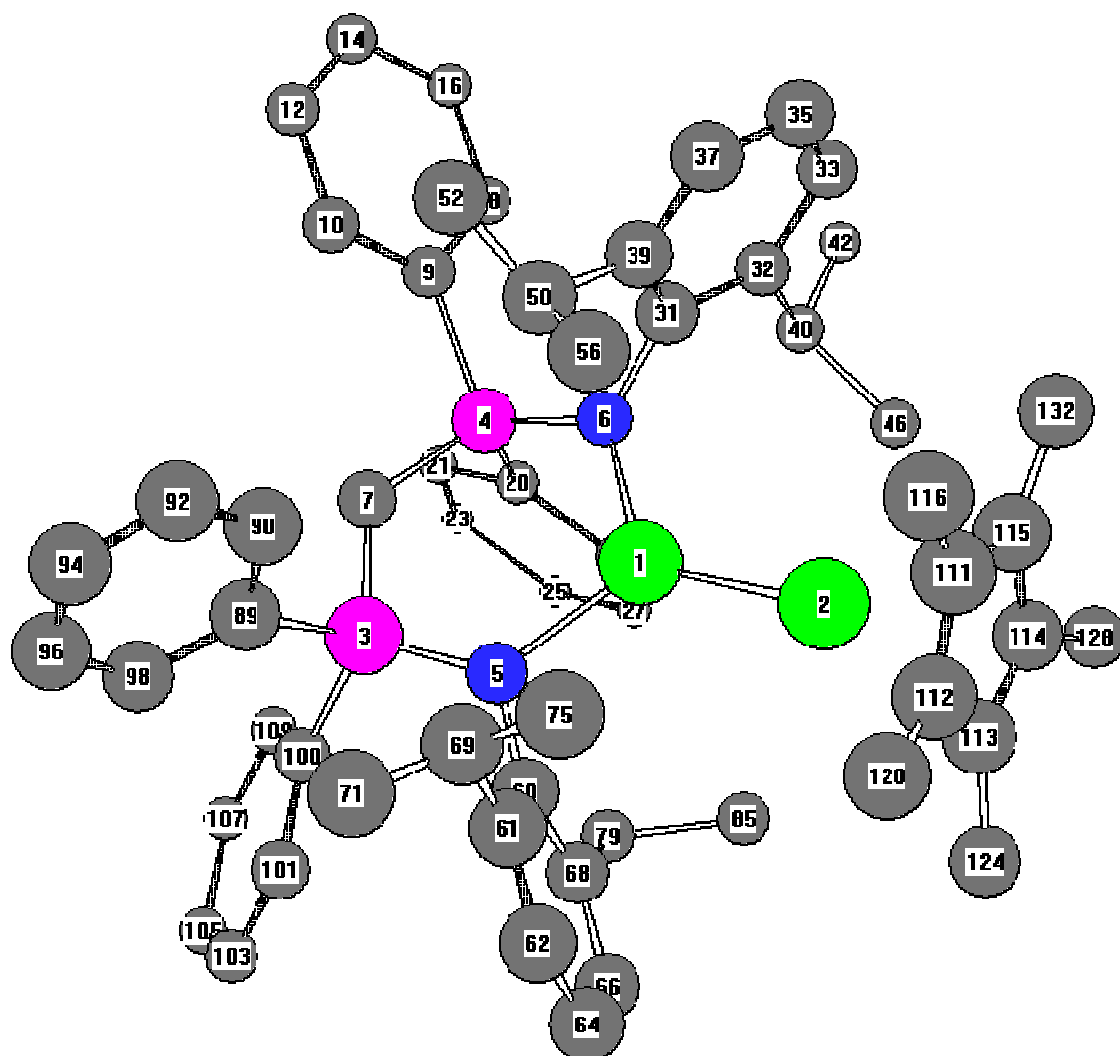

HF=-6639.1865474\

### Optimized Parameters (Angstroms and Degrees) Compound 3'

|     | Definition | Value  | [1] |     | Definition | Value  | [1] |
|-----|------------|--------|-----|-----|------------|--------|-----|
| R1  | R(1,2)     | 2.3809 | 0.0 | R31 | R(20,21)   | 1.4072 | 0.0 |
| R2  | R(1,5)     | 2.0477 | 0.0 | R32 | R(20,29)   | 1.4022 | 0.0 |
| R3  | R(1,6)     | 2.0419 | 0.0 | R33 | R(21,22)   | 1.0931 | 0.0 |
| R4  | R(2,111)   | 2.3351 | 0.0 | R34 | R(21,23)   | 1.3962 | 0.0 |
| R5  | R(2,112)   | 2.345  | 0.0 | R35 | R(23,24)   | 1.0932 | 0.0 |
| R6  | R(2,113)   | 2.349  | 0.0 | R36 | R(23,25)   | 1.3996 | 0.0 |
| R7  | R(2,114)   | 2.351  | 0.0 | R37 | R(25,26)   | 1.093  | 0.0 |
| R8  | R(2,115)   | 2.3388 | 0.0 | R38 | R(25,27)   | 1.3966 | 0.0 |
| R9  | R(3,5)     | 1.6573 | 0.0 | R39 | R(27,28)   | 1.093  | 0.0 |
| R10 | R(3,7)     | 1.7216 | 0.0 | R40 | R(27,29)   | 1.3997 | 0.0 |
| R11 | R(3,89)    | 1.8642 | 0.0 | R41 | R(29,30)   | 1.0909 | 0.0 |
| R12 | R(3,100)   | 1.8519 | 0.0 | R42 | R(31,32)   | 1.4259 | 0.0 |
| R13 | R(4,6)     | 1.6529 | 0.0 | R43 | R(31,39)   | 1.4259 | 0.0 |
| R14 | R(4,7)     | 1.7313 | 0.0 | R44 | R(32,33)   | 1.4018 | 0.0 |
| R15 | R(4,9)     | 1.8374 | 0.0 | R45 | R(32,40)   | 1.5243 | 0.0 |
| R16 | R(4,20)    | 1.857  | 0.0 | R46 | R(33,34)   | 1.0919 | 0.0 |
| R17 | R(5,60)    | 1.4376 | 0.0 | R47 | R(33,35)   | 1.3928 | 0.0 |
| R18 | R(6,31)    | 1.4367 | 0.0 | R48 | R(35,36)   | 1.0931 | 0.0 |
| R19 | R(7,8)     | 1.0912 | 0.0 | R49 | R(35,37)   | 1.3908 | 0.0 |
| R20 | R(9,10)    | 1.404  | 0.0 | R50 | R(37,38)   | 1.093  | 0.0 |
| R21 | R(9,18)    | 1.4056 | 0.0 | R51 | R(37,39)   | 1.403  | 0.0 |
| R22 | R(10,11)   | 1.0911 | 0.0 | R52 | R(39,50)   | 1.5271 | 0.0 |
| R23 | R(10,12)   | 1.398  | 0.0 | R53 | R(40,41)   | 1.0953 | 0.0 |
| R24 | R(12,13)   | 1.0929 | 0.0 | R54 | R(40,42)   | 1.5366 | 0.0 |
| R25 | R(12,14)   | 1.3973 | 0.0 | R55 | R(40,46)   | 1.5388 | 0.0 |
| R26 | R(14,15)   | 1.093  | 0.0 | R56 | R(42,43)   | 1.1018 | 0.0 |
| R27 | R(14,16)   | 1.3981 | 0.0 | R57 | R(42,44)   | 1.1022 | 0.0 |
| R28 | R(16,17)   | 1.0928 | 0.0 | R58 | R(42,45)   | 1.1021 | 0.0 |
| R29 | R(16,18)   | 1.3965 | 0.0 | R59 | R(46,47)   | 1.1027 | 0.0 |
| R30 | R(18,19)   | 1.0913 | 0.0 | R60 | R(46,48)   | 1.1031 | 0.0 |
| R61 | R(46,49)   | 1.1003 | 0.0 | R91 | R(79,80)   | 1.0981 | 0.0 |
| R62 | R(50,51)   | 1.0997 | 0.0 | R92 | R(79,81)   | 1.5372 | 0.0 |
| R63 | R(50,52)   | 1.5391 | 0.0 | R93 | R(79,85)   | 1.5411 | 0.0 |

|      |            |        |     |      |              |          |     |
|------|------------|--------|-----|------|--------------|----------|-----|
| R64  | R(50,56)   | 1.5405 | 0.0 | R94  | R(81,82)     | 1.1025   | 0.0 |
| R65  | R(52,53)   | 1.1024 | 0.0 | R95  | R(81,83)     | 1.1022   | 0.0 |
| R66  | R(52,54)   | 1.1031 | 0.0 | R96  | R(81,84)     | 1.0988   | 0.0 |
| R67  | R(52,55)   | 1.0997 | 0.0 | R97  | R(85,86)     | 1.1011   | 0.0 |
| R68  | R(56,57)   | 1.101  | 0.0 | R98  | R(85,87)     | 1.1026   | 0.0 |
| R69  | R(56,58)   | 1.1032 | 0.0 | R99  | R(85,88)     | 1.1025   | 0.0 |
| R70  | R(56,59)   | 1.1025 | 0.0 | R100 | R(89,90)     | 1.4072   | 0.0 |
| R71  | R(60,61)   | 1.4252 | 0.0 | R101 | R(89,98)     | 1.4032   | 0.0 |
| R72  | R(60,68)   | 1.4267 | 0.0 | R102 | R(90,91)     | 1.0915   | 0.0 |
| R73  | R(61,62)   | 1.403  | 0.0 | R103 | R(90,92)     | 1.3947   | 0.0 |
| R74  | R(61,69)   | 1.5258 | 0.0 | R104 | R(92,93)     | 1.0931   | 0.0 |
| R75  | R(62,63)   | 1.0932 | 0.0 | R105 | R(92,94)     | 1.4002   | 0.0 |
| R76  | R(62,64)   | 1.3923 | 0.0 | R106 | R(94,95)     | 1.0931   | 0.0 |
| R77  | R(64,65)   | 1.0932 | 0.0 | R107 | R(94,96)     | 1.3952   | 0.0 |
| R78  | R(64,66)   | 1.3925 | 0.0 | R108 | R(96,97)     | 1.0931   | 0.0 |
| R79  | R(66,67)   | 1.0928 | 0.0 | R109 | R(96,98)     | 1.401    | 0.0 |
| R80  | R(66,68)   | 1.4023 | 0.0 | R110 | R(98,99)     | 1.09     | 0.0 |
| R81  | R(68,79)   | 1.5275 | 0.0 | R111 | R(100,101)   | 1.4081   | 0.0 |
| R82  | R(69,70)   | 1.0948 | 0.0 | R112 | R(100,109)   | 1.4029   | 0.0 |
| R83  | R(69,71)   | 1.5374 | 0.0 | R113 | R(101,102)   | 1.0914   | 0.0 |
| R84  | R(69,75)   | 1.5388 | 0.0 | R114 | R(101,103)   | 1.3972   | 0.0 |
| R85  | R(71,72)   | 1.1025 | 0.0 | R115 | R(103,104)   | 1.093    | 0.0 |
| R86  | R(71,73)   | 1.1006 | 0.0 | R116 | R(103,105)   | 1.3992   | 0.0 |
| R87  | R(71,74)   | 1.102  | 0.0 | R117 | R(105,106)   | 1.0932   | 0.0 |
| R88  | R(75,76)   | 1.103  | 0.0 | R118 | R(105,107)   | 1.3971   | 0.0 |
| R89  | R(75,77)   | 1.1002 | 0.0 | R119 | R(107,108)   | 1.093    | 0.0 |
| R90  | R(75,78)   | 1.1023 | 0.0 | R120 | R(107,109)   | 1.3987   | 0.0 |
| R121 | R(109,110) | 1.0921 | 0.0 | A5   | A(1,2,112)   | 151.3651 | 0.0 |
| R122 | R(111,112) | 1.4357 | 0.0 | A6   | A(1,2,113)   | 148.6794 | 0.0 |
| R123 | R(111,115) | 1.4342 | 0.0 | A7   | A(1,2,114)   | 146.0601 | 0.0 |
| R124 | R(111,116) | 1.5039 | 0.0 | A8   | A(1,2,115)   | 146.7549 | 0.0 |
| R125 | R(112,113) | 1.4326 | 0.0 | A9   | A(111,2,113) | 59.3942  | 0.0 |
| R126 | R(112,120) | 1.5033 | 0.0 | A10  | A(111,2,114) | 59.3613  | 0.0 |
| R127 | R(113,114) | 1.4344 | 0.0 | A11  | A(112,2,114) | 59.2092  | 0.0 |
| R128 | R(113,124) | 1.5038 | 0.0 | A12  | A(112,2,115) | 59.412   | 0.0 |
| R129 | R(114,115) | 1.434  | 0.0 | A13  | A(113,2,115) | 59.343   | 0.0 |



|      |             |          |     |     |             |          |     |
|------|-------------|----------|-----|-----|-------------|----------|-----|
| R130 | R(114,128)  | 1.5037   | 0.0 | A14 | A(5,3,7)    | 110.8624 | 0.0 |
| R131 | R(115,132)  | 1.5039   | 0.0 | A15 | A(5,3,89)   | 116.7129 | 0.0 |
| R132 | R(116,117)  | 1.1012   | 0.0 | A16 | A(5,3,100)  | 109.8462 | 0.0 |
| R133 | R(116,118)  | 1.1061   | 0.0 | A17 | A(7,3,89)   | 102.5867 | 0.0 |
| R134 | R(116,119)  | 1.1009   | 0.0 | A18 | A(7,3,100)  | 114.2763 | 0.0 |
| R135 | R(120,121)  | 1.1012   | 0.0 | A19 | A(89,3,100) | 102.3191 | 0.0 |
| R136 | R(120,122)  | 1.1      | 0.0 | A20 | A(6,4,7)    | 114.0095 | 0.0 |
| R137 | R(120,123)  | 1.1062   | 0.0 | A21 | A(6,4,9)    | 112.1495 | 0.0 |
| R138 | R(124,125)  | 1.1062   | 0.0 | A22 | A(6,4,20)   | 109.9121 | 0.0 |
| R139 | R(124,126)  | 1.1006   | 0.0 | A23 | A(7,4,9)    | 106.8159 | 0.0 |
| R140 | R(124,127)  | 1.1013   | 0.0 | A24 | A(7,4,20)   | 109.67   | 0.0 |
| R141 | R(128,129)  | 1.1003   | 0.0 | A25 | A(9,4,20)   | 103.7491 | 0.0 |
| R142 | R(128,130)  | 1.1011   | 0.0 | A26 | A(1,5,3)    | 124.923  | 0.0 |
| R143 | R(128,131)  | 1.106    | 0.0 | A27 | A(1,5,60)   | 112.4844 | 0.0 |
| R144 | R(132,133)  | 1.1006   | 0.0 | A28 | A(3,5,60)   | 122.4476 | 0.0 |
| R145 | R(132,134)  | 1.1062   | 0.0 | A29 | A(1,6,4)    | 117.8117 | 0.0 |
| R146 | R(132,135)  | 1.101    | 0.0 | A30 | A(1,6,31)   | 114.615  | 0.0 |
| A1   | A(2,1,5)    | 125.8608 | 0.0 | A31 | A(4,6,31)   | 124.8658 | 0.0 |
| A2   | A(2,1,6)    | 125.7326 | 0.0 | A32 | A(3,7,4)    | 131.011  | 0.0 |
| A3   | A(5,1,6)    | 108.2802 | 0.0 | A33 | A(3,7,8)    | 113.3517 | 0.0 |
| A4   | A(1,2,111)  | 150.019  | 0.0 | A34 | A(4,7,8)    | 115.2572 | 0.0 |
| A35  | A(4,9,10)   | 121.3863 | 0.0 | A65 | A(25,27,28) | 120.1174 | 0.0 |
| A36  | A(4,9,18)   | 119.6419 | 0.0 | A66 | A(25,27,29) | 120.2702 | 0.0 |
| A37  | A(10,9,18)  | 118.9122 | 0.0 | A67 | A(28,27,29) | 119.6105 | 0.0 |
| A38  | A(9,10,11)  | 119.9478 | 0.0 | A68 | A(20,29,27) | 120.6489 | 0.0 |
| A39  | A(9,10,12)  | 120.4435 | 0.0 | A69 | A(20,29,30) | 119.7086 | 0.0 |
| A40  | A(11,10,12) | 119.6077 | 0.0 | A70 | A(27,29,30) | 119.6393 | 0.0 |
| A41  | A(10,12,13) | 119.6125 | 0.0 | A71 | A(6,31,32)  | 121.1408 | 0.0 |
| A42  | A(10,12,14) | 120.2259 | 0.0 | A72 | A(6,31,39)  | 119.9445 | 0.0 |
| A43  | A(13,12,14) | 120.1612 | 0.0 | A73 | A(32,31,39) | 118.8191 | 0.0 |
| A44  | A(12,14,15) | 120.1464 | 0.0 | A74 | A(31,32,33) | 119.4455 | 0.0 |
| A45  | A(12,14,16) | 119.7272 | 0.0 | A75 | A(31,32,40) | 121.5783 | 0.0 |
| A46  | A(15,14,16) | 120.1263 | 0.0 | A76 | A(33,32,40) | 118.9389 | 0.0 |
| A47  | A(14,16,17) | 120.2038 | 0.0 | A77 | A(32,33,34) | 119.3073 | 0.0 |
| A48  | A(14,16,18) | 120.1357 | 0.0 | A78 | A(32,33,35) | 121.6379 | 0.0 |
| A49  | A(17,16,18) | 119.6605 | 0.0 | A79 | A(34,33,35) | 119.0538 | 0.0 |

|      |             |          |     |      |             |          |     |
|------|-------------|----------|-----|------|-------------|----------|-----|
| A50  | A(9,18,16)  | 120.5522 | 0.0 | A80  | A(33,35,36) | 120.4547 | 0.0 |
| A51  | A(9,18,19)  | 120.1623 | 0.0 | A81  | A(33,35,37) | 119.0233 | 0.0 |
| A52  | A(16,18,19) | 119.2821 | 0.0 | A82  | A(36,35,37) | 120.5218 | 0.0 |
| A53  | A(4,20,21)  | 119.4803 | 0.0 | A83  | A(35,37,38) | 119.2134 | 0.0 |
| A54  | A(4,20,29)  | 121.6386 | 0.0 | A84  | A(35,37,39) | 121.6375 | 0.0 |
| A55  | A(21,20,29) | 118.6201 | 0.0 | A85  | A(38,37,39) | 119.1489 | 0.0 |
| A56  | A(20,21,22) | 119.9896 | 0.0 | A86  | A(31,39,37) | 119.4328 | 0.0 |
| A57  | A(20,21,23) | 120.7419 | 0.0 | A87  | A(31,39,50) | 122.7253 | 0.0 |
| A58  | A(22,21,23) | 119.2681 | 0.0 | A88  | A(37,39,50) | 117.8343 | 0.0 |
| A59  | A(21,23,24) | 119.7369 | 0.0 | A89  | A(32,40,41) | 106.9203 | 0.0 |
| A60  | A(21,23,25) | 120.1477 | 0.0 | A90  | A(32,40,42) | 114.2219 | 0.0 |
| A61  | A(24,23,25) | 120.1153 | 0.0 | A91  | A(32,40,46) | 110.9392 | 0.0 |
| A62  | A(23,25,26) | 120.2045 | 0.0 | A92  | A(41,40,42) | 106.8832 | 0.0 |
| A63  | A(23,25,27) | 119.5638 | 0.0 | A93  | A(41,40,46) | 106.9096 | 0.0 |
| A64  | A(26,25,27) | 120.2317 | 0.0 | A94  | A(42,40,46) | 110.5538 | 0.0 |
| A95  | A(40,42,43) | 111.8496 | 0.0 | A125 | A(5,60,61)  | 120.7118 | 0.0 |
| A96  | A(40,42,44) | 110.0345 | 0.0 | A126 | A(5,60,68)  | 120.0861 | 0.0 |
| A97  | A(40,42,45) | 112.3622 | 0.0 | A127 | A(61,60,68) | 119.0781 | 0.0 |
| A98  | A(43,42,44) | 107.9997 | 0.0 | A128 | A(60,61,62) | 119.2747 | 0.0 |
| A99  | A(43,42,45) | 107.4759 | 0.0 | A129 | A(60,61,69) | 122.5248 | 0.0 |
| A100 | A(44,42,45) | 106.8912 | 0.0 | A130 | A(62,61,69) | 118.157  | 0.0 |
| A101 | A(40,46,47) | 110.6213 | 0.0 | A131 | A(61,62,63) | 119.1301 | 0.0 |
| A102 | A(40,46,48) | 111.0918 | 0.0 | A132 | A(61,62,64) | 121.627  | 0.0 |
| A103 | A(40,46,49) | 111.3973 | 0.0 | A133 | A(63,62,64) | 119.2393 | 0.0 |
| A104 | A(47,46,48) | 107.7863 | 0.0 | A134 | A(62,64,65) | 120.4739 | 0.0 |
| A105 | A(47,46,49) | 107.4402 | 0.0 | A135 | A(62,64,66) | 119.0604 | 0.0 |
| A106 | A(48,46,49) | 108.3513 | 0.0 | A136 | A(65,64,66) | 120.4597 | 0.0 |
| A107 | A(39,50,51) | 107.0461 | 0.0 | A137 | A(64,66,67) | 119.1716 | 0.0 |
| A108 | A(39,50,52) | 112.5292 | 0.0 | A138 | A(64,66,68) | 121.6761 | 0.0 |
| A109 | A(39,50,56) | 111.5688 | 0.0 | A139 | A(67,66,68) | 119.1519 | 0.0 |
| A110 | A(51,50,52) | 107.2888 | 0.0 | A140 | A(60,68,66) | 119.2234 | 0.0 |
| A111 | A(51,50,56) | 107.7773 | 0.0 | A141 | A(60,68,79) | 122.6023 | 0.0 |
| A112 | A(52,50,56) | 110.3666 | 0.0 | A142 | A(66,68,79) | 118.1102 | 0.0 |
| A113 | A(50,52,53) | 111.7253 | 0.0 | A143 | A(61,69,70) | 106.9934 | 0.0 |
| A114 | A(50,52,54) | 110.5138 | 0.0 | A144 | A(61,69,71) | 112.8524 | 0.0 |
| A115 | A(50,52,55) | 111.6274 | 0.0 | A145 | A(61,69,75) | 111.3562 | 0.0 |

|      |             |          |     |      |                |          |     |
|------|-------------|----------|-----|------|----------------|----------|-----|
| A116 | A(53,52,54) | 107.1039 | 0.0 | A146 | A(70,69,71)    | 107.6343 | 0.0 |
| A117 | A(53,52,55) | 107.6073 | 0.0 | A147 | A(70,69,75)    | 106.8236 | 0.0 |
| A118 | A(54,52,55) | 108.0664 | 0.0 | A148 | A(71,69,75)    | 110.8474 | 0.0 |
| A119 | A(50,56,57) | 111.3998 | 0.0 | A149 | A(69,71,72)    | 111.7848 | 0.0 |
| A120 | A(50,56,58) | 110.9747 | 0.0 | A150 | A(69,71,73)    | 111.641  | 0.0 |
| A121 | A(50,56,59) | 111.2516 | 0.0 | A151 | A(69,71,74)    | 110.4456 | 0.0 |
| A122 | A(57,56,58) | 108.0031 | 0.0 | A152 | A(72,71,73)    | 107.8175 | 0.0 |
| A123 | A(57,56,59) | 107.4514 | 0.0 | A153 | A(72,71,74)    | 107.3552 | 0.0 |
| A124 | A(58,56,59) | 107.583  | 0.0 | A154 | A(73,71,74)    | 107.5961 | 0.0 |
| A155 | A(69,75,76) | 110.5795 | 0.0 | A185 | A(90,92,93)    | 119.7791 | 0.0 |
| A156 | A(69,75,77) | 111.0225 | 0.0 | A186 | A(90,92,94)    | 120.0583 | 0.0 |
| A157 | A(69,75,78) | 111.6551 | 0.0 | A187 | A(93,92,94)    | 120.1607 | 0.0 |
| A158 | A(76,75,77) | 108.0713 | 0.0 | A188 | A(92,94,95)    | 120.1844 | 0.0 |
| A159 | A(76,75,78) | 107.6467 | 0.0 | A189 | A(92,94,96)    | 119.5744 | 0.0 |
| A160 | A(77,75,78) | 107.7112 | 0.0 | A190 | A(95,94,96)    | 120.2396 | 0.0 |
| A161 | A(68,79,80) | 107.3118 | 0.0 | A191 | A(94,96,97)    | 120.1601 | 0.0 |
| A162 | A(68,79,81) | 113.6182 | 0.0 | A192 | A(94,96,98)    | 120.3179 | 0.0 |
| A163 | A(68,79,85) | 110.4605 | 0.0 | A193 | A(97,96,98)    | 119.5216 | 0.0 |
| A164 | A(80,79,81) | 107.2682 | 0.0 | A194 | A(89,98,96)    | 120.6278 | 0.0 |
| A165 | A(80,79,85) | 107.5872 | 0.0 | A195 | A(89,98,99)    | 120.4218 | 0.0 |
| A166 | A(81,79,85) | 110.3224 | 0.0 | A196 | A(96,98,99)    | 118.9446 | 0.0 |
| A167 | A(79,81,82) | 111.8782 | 0.0 | A197 | A(3,100,101)   | 122.1241 | 0.0 |
| A168 | A(79,81,83) | 110.0638 | 0.0 | A198 | A(3,100,109)   | 118.9792 | 0.0 |
| A169 | A(79,81,84) | 111.7207 | 0.0 | A199 | A(101,100,109) | 118.8857 | 0.0 |
| A170 | A(82,81,83) | 107.1896 | 0.0 | A200 | A(100,101,102) | 120.4853 | 0.0 |
| A171 | A(82,81,84) | 107.9365 | 0.0 | A201 | A(100,101,103) | 120.3906 | 0.0 |
| A172 | A(83,81,84) | 107.8584 | 0.0 | A202 | A(102,101,103) | 119.1239 | 0.0 |
| A173 | A(79,85,86) | 111.4725 | 0.0 | A203 | A(101,103,104) | 119.6112 | 0.0 |
| A174 | A(79,85,87) | 110.9354 | 0.0 | A204 | A(101,103,105) | 120.2437 | 0.0 |
| A175 | A(79,85,88) | 111.0876 | 0.0 | A205 | A(104,103,105) | 120.1445 | 0.0 |
| A176 | A(86,85,87) | 108.3267 | 0.0 | A206 | A(103,105,106) | 120.0807 | 0.0 |
| A177 | A(86,85,88) | 107.2766 | 0.0 | A207 | A(103,105,107) | 119.7358 | 0.0 |
| A178 | A(87,85,88) | 107.5705 | 0.0 | A208 | A(106,105,107) | 120.1833 | 0.0 |
| A179 | A(3,89,90)  | 117.1205 | 0.0 | A209 | A(105,107,108) | 120.1976 | 0.0 |
| A180 | A(3,89,98)  | 124.2586 | 0.0 | A210 | A(105,107,109) | 120.1061 | 0.0 |
| A181 | A(90,89,98) | 118.4449 | 0.0 | A211 | A(108,107,109) | 119.6962 | 0.0 |

|      |                |          |     |      |                |           |     |
|------|----------------|----------|-----|------|----------------|-----------|-----|
| A182 | A(89,90,91)    | 119.4103 | 0.0 | A212 | A(100,109,107) | 120.6347  | 0.0 |
| A183 | A(89,90,92)    | 120.966  | 0.0 | A213 | A(100,109,110) | 119.1701  | 0.0 |
| A184 | A(91,90,92)    | 119.6177 | 0.0 | A214 | A(107,109,110) | 120.1952  | 0.0 |
| A215 | A(2,111,116)   | 125.1787 | 0.0 | A245 | A(121,120,123) | 106.8733  | 0.0 |
| A216 | A(112,111,115) | 107.9529 | 0.0 | A246 | A(122,120,123) | 106.8885  | 0.0 |
| A217 | A(112,111,116) | 126.1861 | 0.0 | A247 | A(113,124,125) | 111.6233  | 0.0 |
| A218 | A(115,111,116) | 125.6346 | 0.0 | A248 | A(113,124,126) | 111.8453  | 0.0 |
| A219 | A(2,112,120)   | 126.7698 | 0.0 | A249 | A(113,124,127) | 112.0583  | 0.0 |
| A220 | A(111,112,113) | 108.0075 | 0.0 | A250 | A(125,124,126) | 106.8543  | 0.0 |
| A221 | A(111,112,120) | 126.3824 | 0.0 | A251 | A(125,124,127) | 106.9807  | 0.0 |
| A222 | A(113,112,120) | 125.2699 | 0.0 | A252 | A(126,124,127) | 107.1623  | 0.0 |
| A223 | A(2,113,124)   | 125.3667 | 0.0 | A253 | A(114,128,129) | 112.0305  | 0.0 |
| A224 | A(112,113,114) | 108.0301 | 0.0 | A254 | A(114,128,130) | 112.0723  | 0.0 |
| A225 | A(112,113,124) | 125.4325 | 0.0 | A255 | A(114,128,131) | 111.488   | 0.0 |
| A226 | A(114,113,124) | 126.3346 | 0.0 | A256 | A(129,128,130) | 107.2391  | 0.0 |
| A227 | A(2,114,128)   | 126.0603 | 0.0 | A257 | A(129,128,131) | 106.8906  | 0.0 |
| A228 | A(113,114,115) | 108.0044 | 0.0 | A258 | A(130,128,131) | 106.7965  | 0.0 |
| A229 | A(113,114,128) | 125.8489 | 0.0 | A259 | A(115,132,133) | 111.9939  | 0.0 |
| A230 | A(115,114,128) | 125.9198 | 0.0 | A260 | A(115,132,134) | 111.6283  | 0.0 |
| A231 | A(2,115,132)   | 124.7918 | 0.0 | A261 | A(115,132,135) | 112.0807  | 0.0 |
| A232 | A(111,115,114) | 108.0028 | 0.0 | A262 | A(133,132,134) | 106.9066  | 0.0 |
| A233 | A(111,115,132) | 125.62   | 0.0 | A263 | A(133,132,135) | 106.9533  | 0.0 |
| A234 | A(114,115,132) | 126.2043 | 0.0 | A264 | A(134,132,135) | 106.9474  | 0.0 |
| A235 | A(111,116,117) | 111.9507 | 0.0 | D1   | D(5,1,2,111)   | -105.1828 | 0.0 |
| A236 | A(111,116,118) | 111.6039 | 0.0 | D2   | D(5,1,2,112)   | -27.6144  | 0.0 |
| A237 | A(111,116,119) | 112.0536 | 0.0 | D3   | D(5,1,2,113)   | 47.5188   | 0.0 |
| A238 | A(117,116,118) | 106.7995 | 0.0 | D4   | D(5,1,2,114)   | 116.3079  | 0.0 |
| A239 | A(117,116,119) | 107.2421 | 0.0 | D5   | D(5,1,2,115)   | -176.6081 | 0.0 |
| A240 | A(118,116,119) | 106.8665 | 0.0 | D6   | D(6,1,2,111)   | 79.3889   | 0.0 |
| A241 | A(112,120,121) | 112.1873 | 0.0 | D7   | D(6,1,2,112)   | 156.9573  | 0.0 |
| A242 | A(112,120,122) | 112.0337 | 0.0 | D8   | D(6,1,2,113)   | -127.9095 | 0.0 |
| A243 | A(112,120,123) | 111.2303 | 0.0 | D9   | D(6,1,2,114)   | -59.1204  | 0.0 |
| A244 | A(121,120,122) | 107.3128 | 0.0 | D10  | D(6,1,2,115)   | 7.9636    | 0.0 |
| D11  | D(2,1,5,3)     | 169.6466 | 0.0 | D41  | D(5,3,7,8)     | -165.4902 | 0.0 |
| D12  | D(2,1,5,60)    | -14.656  | 0.0 | D42  | D(89,3,7,4)    | 147.3607  | 0.0 |
| D13  | D(6,1,5,3)     | -14.2607 | 0.0 | D43  | D(89,3,7,8)    | -40.1802  | 0.0 |

|     |                  |           |     |      |                 |           |     |
|-----|------------------|-----------|-----|------|-----------------|-----------|-----|
| D14 | D(6,1,5,60)      | 161.4367  | 0.0 | D44  | D(100,3,7,4)    | -102.7307 | 0.0 |
| D15 | D(2,1,6,4)       | 167.0635  | 0.0 | D45  | D(100,3,7,8)    | 69.7284   | 0.0 |
| D16 | D(2,1,6,31)      | -30.6491  | 0.0 | D46  | D(5,3,89,90)    | 61.7374   | 0.0 |
| D17 | D(5,1,6,4)       | -9.0355   | 0.0 | D47  | D(5,3,89,98)    | -123.1722 | 0.0 |
| D18 | D(5,1,6,31)      | 153.2519  | 0.0 | D48  | D(7,3,89,90)    | -59.6522  | 0.0 |
| D19 | D(1,2,111,116)   | 4.3701    | 0.0 | D49  | D(7,3,89,98)    | 115.4382  | 0.0 |
| D20 | D(113,2,111,116) | -159.5491 | 0.0 | D50  | D(100,3,89,90)  | -178.3344 | 0.0 |
| D21 | D(114,2,111,116) | 158.9086  | 0.0 | D51  | D(100,3,89,98)  | -3.244    | 0.0 |
| D22 | D(1,2,112,120)   | -1.075    | 0.0 | D52  | D(5,3,100,101)  | 61.6559   | 0.0 |
| D23 | D(114,2,112,120) | -158.5717 | 0.0 | D53  | D(5,3,100,109)  | -119.5648 | 0.0 |
| D24 | D(115,2,112,120) | 159.7742  | 0.0 | D54  | D(7,3,100,101)  | -173.0253 | 0.0 |
| D25 | D(1,2,113,124)   | -5.9993   | 0.0 | D55  | D(7,3,100,109)  | 5.754     | 0.0 |
| D26 | D(111,2,113,124) | 158.558   | 0.0 | D56  | D(89,3,100,101) | -62.9543  | 0.0 |
| D27 | D(115,2,113,124) | -159.6581 | 0.0 | D57  | D(89,3,100,109) | 115.825   | 0.0 |
| D28 | D(1,2,114,128)   | -1.7342   | 0.0 | D58  | D(7,4,6,1)      | 33.036    | 0.0 |
| D29 | D(111,2,114,128) | -159.1045 | 0.0 | D59  | D(7,4,6,31)     | -127.2632 | 0.0 |
| D30 | D(112,2,114,128) | 159.0872  | 0.0 | D60  | D(9,4,6,1)      | 154.5865  | 0.0 |
| D31 | D(1,2,115,132)   | 4.488     | 0.0 | D61  | D(9,4,6,31)     | -5.7127   | 0.0 |
| D32 | D(112,2,115,132) | -158.8474 | 0.0 | D62  | D(20,4,6,1)     | -90.5551  | 0.0 |
| D33 | D(113,2,115,132) | 159.6071  | 0.0 | D63  | D(20,4,6,31)    | 109.1457  | 0.0 |
| D34 | D(7,3,5,1)       | 9.4316    | 0.0 | D64  | D(6,4,7,3)      | -45.9541  | 0.0 |
| D35 | D(7,3,5,60)      | -165.8565 | 0.0 | D65  | D(6,4,7,8)      | 141.7015  | 0.0 |
| D36 | D(89,3,5,1)      | -107.4954 | 0.0 | D66  | D(9,4,7,3)      | -170.4113 | 0.0 |
| D37 | D(89,3,5,60)     | 77.2164   | 0.0 | D67  | D(9,4,7,8)      | 17.2444   | 0.0 |
| D38 | D(100,3,5,1)     | 136.6835  | 0.0 | D68  | D(20,4,7,3)     | 77.7679   | 0.0 |
| D39 | D(100,3,5,60)    | -38.6046  | 0.0 | D69  | D(20,4,7,8)     | -94.5764  | 0.0 |
| D40 | D(5,3,7,4)       | 22.0507   | 0.0 | D70  | D(6,4,9,10)     | -102.3301 | 0.0 |
| D71 | D(6,4,9,18)      | 74.831    | 0.0 | D101 | D(11,10,12,14)  | 179.0162  | 0.0 |
| D72 | D(7,4,9,10)      | 23.2581   | 0.0 | D102 | D(10,12,14,15)  | -179.806  | 0.0 |
| D73 | D(7,4,9,18)      | -159.5808 | 0.0 | D103 | D(10,12,14,16)  | 0.1709    | 0.0 |
| D74 | D(20,4,9,10)     | 139.1044  | 0.0 | D104 | D(13,12,14,15)  | -0.037    | 0.0 |
| D75 | D(20,4,9,18)     | -43.7345  | 0.0 | D105 | D(13,12,14,16)  | 179.94    | 0.0 |
| D76 | D(6,4,20,21)     | -163.3967 | 0.0 | D106 | D(12,14,16,17)  | -179.8678 | 0.0 |
| D77 | D(6,4,20,29)     | 22.5548   | 0.0 | D107 | D(12,14,16,18)  | 0.2097    | 0.0 |
| D78 | D(7,4,20,21)     | 70.5127   | 0.0 | D108 | D(15,14,16,17)  | 0.1092    | 0.0 |
| D79 | D(7,4,20,29)     | -103.5358 | 0.0 | D109 | D(15,14,16,18)  | -179.8133 | 0.0 |

|      |                |           |     |      |                |           |     |
|------|----------------|-----------|-----|------|----------------|-----------|-----|
| D80  | D(9,4,20,21)   | -43.3002  | 0.0 | D110 | D(14,16,18,9)  | -0.1502   | 0.0 |
| D81  | D(9,4,20,29)   | 142.6513  | 0.0 | D111 | D(14,16,18,19) | 179.1791  | 0.0 |
| D82  | D(1,5,60,61)   | 94.5268   | 0.0 | D112 | D(17,16,18,9)  | 179.9269  | 0.0 |
| D83  | D(1,5,60,68)   | -81.388   | 0.0 | D113 | D(17,16,18,19) | -0.7437   | 0.0 |
| D84  | D(3,5,60,61)   | -89.6533  | 0.0 | D114 | D(4,20,21,22)  | 5.0579    | 0.0 |
| D85  | D(3,5,60,68)   | 94.4318   | 0.0 | D115 | D(4,20,21,23)  | -175.1699 | 0.0 |
| D86  | D(1,6,31,32)   | 107.3222  | 0.0 | D116 | D(29,20,21,22) | 179.2862  | 0.0 |
| D87  | D(1,6,31,39)   | -69.0804  | 0.0 | D117 | D(29,20,21,23) | -0.9415   | 0.0 |
| D88  | D(4,6,31,32)   | -91.8235  | 0.0 | D118 | D(4,20,29,27)  | 174.4609  | 0.0 |
| D89  | D(4,6,31,39)   | 91.7739   | 0.0 | D119 | D(4,20,29,30)  | -6.191    | 0.0 |
| D90  | D(4,9,10,11)   | -1.7816   | 0.0 | D120 | D(21,20,29,27) | 0.3628    | 0.0 |
| D91  | D(4,9,10,12)   | 177.8481  | 0.0 | D121 | D(21,20,29,30) | 179.7109  | 0.0 |
| D92  | D(18,9,10,11)  | -178.9629 | 0.0 | D122 | D(20,21,23,24) | -179.1498 | 0.0 |
| D93  | D(18,9,10,12)  | 0.6668    | 0.0 | D123 | D(20,21,23,25) | 0.7985    | 0.0 |
| D94  | D(4,9,18,16)   | -177.5173 | 0.0 | D124 | D(22,21,23,24) | 0.624     | 0.0 |
| D95  | D(4,9,18,19)   | 3.1593    | 0.0 | D125 | D(22,21,23,25) | -179.4277 | 0.0 |
| D96  | D(10,9,18,16)  | -0.2858   | 0.0 | D126 | D(21,23,25,26) | 179.9764  | 0.0 |
| D97  | D(10,9,18,19)  | -179.6093 | 0.0 | D127 | D(21,23,25,27) | -0.0614   | 0.0 |
| D98  | D(9,10,12,13)  | 179.6148  | 0.0 | D128 | D(24,23,25,26) | -0.0754   | 0.0 |
| D99  | D(9,10,12,14)  | -0.6148   | 0.0 | D129 | D(24,23,25,27) | 179.8867  | 0.0 |
| D100 | D(11,10,12,13) | -0.7542   | 0.0 | D130 | D(23,25,27,28) | 179.9925  | 0.0 |
| D131 | D(23,25,27,29) | -0.514    | 0.0 | D161 | D(33,35,37,39) | -0.0535   | 0.0 |
| D132 | D(26,25,27,28) | -0.0453   | 0.0 | D162 | D(36,35,37,38) | 0.0099    | 0.0 |
| D133 | D(26,25,27,29) | 179.4482  | 0.0 | D163 | D(36,35,37,39) | 179.8369  | 0.0 |
| D134 | D(25,27,29,20) | 0.3606    | 0.0 | D164 | D(35,37,39,31) | 0.5674    | 0.0 |
| D135 | D(25,27,29,30) | -178.9878 | 0.0 | D165 | D(35,37,39,50) | 179.5913  | 0.0 |
| D136 | D(28,27,29,20) | 179.8568  | 0.0 | D166 | D(38,37,39,31) | -179.6054 | 0.0 |
| D137 | D(28,27,29,30) | 0.5083    | 0.0 | D167 | D(38,37,39,50) | -0.5815   | 0.0 |
| D138 | D(6,31,32,33)  | -176.0835 | 0.0 | D168 | D(31,39,50,51) | -7.5284   | 0.0 |
| D139 | D(6,31,32,40)  | 1.6726    | 0.0 | D169 | D(31,39,50,52) | -125.1552 | 0.0 |
| D140 | D(39,31,32,33) | 0.3588    | 0.0 | D170 | D(31,39,50,56) | 110.1556  | 0.0 |
| D141 | D(39,31,32,40) | 178.1148  | 0.0 | D171 | D(37,39,50,51) | 173.4821  | 0.0 |
| D142 | D(6,31,39,37)  | 175.7759  | 0.0 | D172 | D(37,39,50,52) | 55.8553   | 0.0 |
| D143 | D(6,31,39,50)  | -3.1981   | 0.0 | D173 | D(37,39,50,56) | -68.8339  | 0.0 |
| D144 | D(32,31,39,37) | -0.71     | 0.0 | D174 | D(32,40,42,43) | -50.9034  | 0.0 |
| D145 | D(32,31,39,50) | -179.684  | 0.0 | D175 | D(32,40,42,44) | -170.9425 | 0.0 |

|      |                |           |     |      |                |           |     |
|------|----------------|-----------|-----|------|----------------|-----------|-----|
| D146 | D(31,32,33,34) | 179.798   | 0.0 | D176 | D(32,40,42,45) | 70.0819   | 0.0 |
| D147 | D(31,32,33,35) | 0.1557    | 0.0 | D177 | D(41,40,42,43) | 67.1342   | 0.0 |
| D148 | D(40,32,33,34) | 1.9824    | 0.0 | D178 | D(41,40,42,44) | -52.9049  | 0.0 |
| D149 | D(40,32,33,35) | -177.6599 | 0.0 | D179 | D(41,40,42,45) | -171.8805 | 0.0 |
| D150 | D(31,32,40,41) | 26.2205   | 0.0 | D180 | D(46,40,42,43) | -176.8622 | 0.0 |
| D151 | D(31,32,40,42) | 144.237   | 0.0 | D181 | D(46,40,42,44) | 63.0988   | 0.0 |
| D152 | D(31,32,40,46) | -90.0063  | 0.0 | D182 | D(46,40,42,45) | -55.8769  | 0.0 |
| D153 | D(33,32,40,41) | -156.0123 | 0.0 | D183 | D(32,40,46,47) | -65.2496  | 0.0 |
| D154 | D(33,32,40,42) | -37.9959  | 0.0 | D184 | D(32,40,46,48) | 175.0837  | 0.0 |
| D155 | D(33,32,40,46) | 87.7609   | 0.0 | D185 | D(32,40,46,49) | 54.182    | 0.0 |
| D156 | D(32,33,35,36) | 179.7952  | 0.0 | D186 | D(41,40,46,47) | 178.517   | 0.0 |
| D157 | D(32,33,35,37) | -0.3143   | 0.0 | D187 | D(41,40,46,48) | 58.8502   | 0.0 |
| D158 | D(34,33,35,36) | 0.152     | 0.0 | D188 | D(41,40,46,49) | -62.0514  | 0.0 |
| D159 | D(34,33,35,37) | -179.9574 | 0.0 | D189 | D(42,40,46,47) | 62.5298   | 0.0 |
| D160 | D(33,35,37,38) | -179.8806 | 0.0 | D190 | D(42,40,46,48) | -57.137   | 0.0 |
| D191 | D(42,40,46,49) | -178.0386 | 0.0 | D221 | D(69,61,62,64) | -176.6689 | 0.0 |
| D192 | D(39,50,52,53) | -67.3737  | 0.0 | D222 | D(60,61,69,70) | 6.611     | 0.0 |
| D193 | D(39,50,52,54) | 173.4751  | 0.0 | D223 | D(60,61,69,71) | 124.8107  | 0.0 |
| D194 | D(39,50,52,55) | 53.1744   | 0.0 | D224 | D(60,61,69,75) | -109.7771 | 0.0 |
| D195 | D(51,50,52,53) | 175.1431  | 0.0 | D225 | D(62,61,69,70) | -175.8068 | 0.0 |
| D196 | D(51,50,52,54) | 55.992    | 0.0 | D226 | D(62,61,69,71) | -57.6071  | 0.0 |
| D197 | D(51,50,52,55) | -64.3087  | 0.0 | D227 | D(62,61,69,75) | 67.8051   | 0.0 |
| D198 | D(56,50,52,53) | 57.973    | 0.0 | D228 | D(61,62,64,65) | -179.8921 | 0.0 |
| D199 | D(56,50,52,54) | -61.1782  | 0.0 | D229 | D(61,62,64,66) | 0.9998    | 0.0 |
| D200 | D(56,50,52,55) | 178.5211  | 0.0 | D230 | D(63,62,64,65) | 0.7938    | 0.0 |
| D201 | D(39,50,56,57) | -56.1065  | 0.0 | D231 | D(63,62,64,66) | -178.3143 | 0.0 |
| D202 | D(39,50,56,58) | -176.4873 | 0.0 | D232 | D(62,64,66,67) | 178.4585  | 0.0 |
| D203 | D(39,50,56,59) | 63.7624   | 0.0 | D233 | D(62,64,66,68) | -1.3011   | 0.0 |
| D204 | D(51,50,56,57) | 61.1363   | 0.0 | D234 | D(65,64,66,67) | -0.6497   | 0.0 |
| D205 | D(51,50,56,58) | -59.2445  | 0.0 | D235 | D(65,64,66,68) | 179.5907  | 0.0 |
| D206 | D(51,50,56,59) | -178.9948 | 0.0 | D236 | D(64,66,68,60) | -0.402    | 0.0 |
| D207 | D(52,50,56,57) | 178.0039  | 0.0 | D237 | D(64,66,68,79) | 176.7644  | 0.0 |
| D208 | D(52,50,56,58) | 57.6231   | 0.0 | D238 | D(67,66,68,60) | 179.8384  | 0.0 |
| D209 | D(52,50,56,59) | -62.1273  | 0.0 | D239 | D(67,66,68,79) | -2.9953   | 0.0 |
| D210 | D(5,60,61,62)  | -178.6273 | 0.0 | D240 | D(60,68,79,80) | -12.1995  | 0.0 |
| D211 | D(5,60,61,69)  | -1.0711   | 0.0 | D241 | D(60,68,79,81) | -130.6012 | 0.0 |

|      |                |           |     |      |                  |           |     |
|------|----------------|-----------|-----|------|------------------|-----------|-----|
| D212 | D(68,60,61,62) | -2.6718   | 0.0 | D242 | D(60,68,79,85)   | 104.8073  | 0.0 |
| D213 | D(68,60,61,69) | 174.8844  | 0.0 | D243 | D(66,68,79,80)   | 170.7362  | 0.0 |
| D214 | D(5,60,68,66)  | 178.3654  | 0.0 | D244 | D(66,68,79,81)   | 52.3345   | 0.0 |
| D215 | D(5,60,68,79)  | 1.3324    | 0.0 | D245 | D(66,68,79,85)   | -72.257   | 0.0 |
| D216 | D(61,60,68,66) | 2.384     | 0.0 | D246 | D(61,69,71,72)   | 65.0177   | 0.0 |
| D217 | D(61,60,68,79) | -174.649  | 0.0 | D247 | D(61,69,71,73)   | -55.8513  | 0.0 |
| D218 | D(60,61,62,63) | -179.6911 | 0.0 | D248 | D(61,69,71,74)   | -175.5215 | 0.0 |
| D219 | D(60,61,62,64) | 0.9941    | 0.0 | D249 | D(70,69,71,72)   | -177.1582 | 0.0 |
| D220 | D(69,61,62,63) | 2.6459    | 0.0 | D250 | D(70,69,71,73)   | 61.9728   | 0.0 |
| D251 | D(70,69,71,74) | -57.6973  | 0.0 | D281 | D(81,79,85,88)   | -63.7389  | 0.0 |
| D252 | D(75,69,71,72) | -60.6693  | 0.0 | D282 | D(3,89,90,91)    | -2.4835   | 0.0 |
| D253 | D(75,69,71,73) | 178.4617  | 0.0 | D283 | D(3,89,90,92)    | 176.6244  | 0.0 |
| D254 | D(75,69,71,74) | 58.7915   | 0.0 | D284 | D(98,89,90,91)   | -177.8692 | 0.0 |
| D255 | D(61,69,75,76) | 176.2393  | 0.0 | D285 | D(98,89,90,92)   | 1.2387    | 0.0 |
| D256 | D(61,69,75,77) | 56.2877   | 0.0 | D286 | D(3,89,98,96)    | -175.8135 | 0.0 |
| D257 | D(61,69,75,78) | -63.9276  | 0.0 | D287 | D(3,89,98,99)    | 3.2954    | 0.0 |
| D258 | D(70,69,75,76) | 59.7474   | 0.0 | D288 | D(90,89,98,96)   | -0.7834   | 0.0 |
| D259 | D(70,69,75,77) | -60.2042  | 0.0 | D289 | D(90,89,98,99)   | 178.3254  | 0.0 |
| D260 | D(70,69,75,78) | 179.5806  | 0.0 | D290 | D(89,90,92,93)   | 179.6728  | 0.0 |
| D261 | D(71,69,75,76) | -57.2404  | 0.0 | D291 | D(89,90,92,94)   | -0.8255   | 0.0 |
| D262 | D(71,69,75,77) | -177.1921 | 0.0 | D292 | D(91,90,92,93)   | -1.2212   | 0.0 |
| D263 | D(71,69,75,78) | 62.5927   | 0.0 | D293 | D(91,90,92,94)   | 178.2805  | 0.0 |
| D264 | D(68,79,81,82) | -66.8478  | 0.0 | D294 | D(90,92,94,95)   | -179.6172 | 0.0 |
| D265 | D(68,79,81,83) | 174.0932  | 0.0 | D295 | D(90,92,94,96)   | -0.0645   | 0.0 |
| D266 | D(68,79,81,84) | 54.2964   | 0.0 | D296 | D(93,92,94,95)   | -0.1174   | 0.0 |
| D267 | D(80,79,81,82) | 174.7254  | 0.0 | D297 | D(93,92,94,96)   | 179.4353  | 0.0 |
| D268 | D(80,79,81,83) | 55.6665   | 0.0 | D298 | D(92,94,96,97)   | -179.2454 | 0.0 |
| D269 | D(80,79,81,84) | -64.1304  | 0.0 | D299 | D(92,94,96,98)   | 0.5139    | 0.0 |
| D270 | D(85,79,81,82) | 57.818    | 0.0 | D300 | D(95,94,96,97)   | 0.307     | 0.0 |
| D271 | D(85,79,81,83) | -61.2409  | 0.0 | D301 | D(95,94,96,98)   | -179.9336 | 0.0 |
| D272 | D(85,79,81,84) | 178.9622  | 0.0 | D302 | D(94,96,98,89)   | -0.0817   | 0.0 |
| D273 | D(68,79,85,86) | -56.8704  | 0.0 | D303 | D(94,96,98,99)   | -179.2035 | 0.0 |
| D274 | D(68,79,85,87) | -177.6846 | 0.0 | D304 | D(97,96,98,89)   | 179.6792  | 0.0 |
| D275 | D(68,79,85,88) | 62.7154   | 0.0 | D305 | D(97,96,98,99)   | 0.5574    | 0.0 |
| D276 | D(80,79,85,86) | 59.966    | 0.0 | D306 | D(3,100,101,102) | -1.6313   | 0.0 |
| D277 | D(80,79,85,87) | -60.8482  | 0.0 | D307 | D(3,100,101,103) | 178.2062  | 0.0 |



|      |                    |           |     |      |                    |           |     |
|------|--------------------|-----------|-----|------|--------------------|-----------|-----|
| D278 | D(80,79,85,88)     | 179.5518  | 0.0 | D308 | D(109,100,101,102) | 179.5882  | 0.0 |
| D279 | D(81,79,85,86)     | 176.6753  | 0.0 | D309 | D(109,100,101,103) | -0.5742   | 0.0 |
| D280 | D(81,79,85,87)     | 55.8611   | 0.0 | D310 | D(3,100,109,107)   | -178.5676 | 0.0 |
| D311 | D(3,100,109,110)   | 1.4569    | 0.0 | D341 | D(112,111,116,117) | -151.5804 | 0.0 |
| D312 | D(101,100,109,107) | 0.2517    | 0.0 | D342 | D(112,111,116,118) | 88.7658   | 0.0 |
| D313 | D(101,100,109,110) | -179.7237 | 0.0 | D343 | D(112,111,116,119) | -31.0444  | 0.0 |
| D314 | D(100,101,103,104) | -179.9222 | 0.0 | D344 | D(115,111,116,117) | 34.5549   | 0.0 |
| D315 | D(100,101,103,105) | 0.3577    | 0.0 | D345 | D(115,111,116,118) | -85.0989  | 0.0 |
| D316 | D(102,101,103,104) | -0.0825   | 0.0 | D346 | D(115,111,116,119) | 155.0908  | 0.0 |
| D317 | D(102,101,103,105) | -179.8025 | 0.0 | D347 | D(111,112,113,114) | 0.4685    | 0.0 |
| D318 | D(101,103,105,106) | 179.9843  | 0.0 | D348 | D(111,112,113,124) | 175.5546  | 0.0 |
| D319 | D(101,103,105,107) | 0.1891    | 0.0 | D349 | D(120,112,113,114) | -173.1773 | 0.0 |
| D320 | D(104,103,105,106) | 0.2658    | 0.0 | D350 | D(120,112,113,124) | 1.9089    | 0.0 |
| D321 | D(104,103,105,107) | -179.5294 | 0.0 | D351 | D(2,112,120,121)   | 53.2289   | 0.0 |
| D322 | D(103,105,107,108) | 179.6299  | 0.0 | D352 | D(2,112,120,122)   | -67.5523  | 0.0 |
| D323 | D(103,105,107,109) | -0.5113   | 0.0 | D353 | D(2,112,120,123)   | 172.8806  | 0.0 |
| D324 | D(106,105,107,108) | -0.1651   | 0.0 | D354 | D(111,112,120,121) | 146.9698  | 0.0 |
| D325 | D(106,105,107,109) | 179.6937  | 0.0 | D355 | D(111,112,120,122) | 26.1885   | 0.0 |
| D326 | D(105,107,109,100) | 0.2897    | 0.0 | D356 | D(111,112,120,123) | -93.3785  | 0.0 |
| D327 | D(105,107,109,110) | -179.7351 | 0.0 | D357 | D(113,112,120,121) | -40.5425  | 0.0 |
| D328 | D(108,107,109,100) | -179.8508 | 0.0 | D358 | D(113,112,120,122) | -161.3237 | 0.0 |
| D329 | D(108,107,109,110) | 0.1244    | 0.0 | D359 | D(113,112,120,123) | 79.1093   | 0.0 |
| D330 | D(115,111,112,113) | -0.2879   | 0.0 | D360 | D(112,113,114,115) | -0.4703   | 0.0 |
| D331 | D(115,111,112,120) | 173.2677  | 0.0 | D361 | D(112,113,114,128) | 174.3058  | 0.0 |
| D332 | D(116,111,112,113) | -175.049  | 0.0 | D362 | D(124,113,114,115) | -175.5    | 0.0 |
| D333 | D(116,111,112,120) | -1.4933   | 0.0 | D363 | D(124,113,114,128) | -0.7239   | 0.0 |
| D334 | D(112,111,115,114) | -0.0027   | 0.0 | D364 | D(2,113,124,125)   | -173.0779 | 0.0 |
| D335 | D(112,111,115,132) | -175.4569 | 0.0 | D365 | D(2,113,124,126)   | 67.2571   | 0.0 |
| D336 | D(116,111,115,114) | 174.7949  | 0.0 | D366 | D(2,113,124,127)   | -53.1048  | 0.0 |
| D337 | D(116,111,115,132) | -0.6593   | 0.0 | D367 | D(112,113,124,125) | -80.6809  | 0.0 |
| D338 | D(2,111,116,117)   | -58.1346  | 0.0 | D368 | D(112,113,124,126) | 159.6541  | 0.0 |
| D339 | D(2,111,116,118)   | -177.7884 | 0.0 | D369 | D(112,113,124,127) | 39.2922   | 0.0 |
| D340 | D(2,111,116,119)   | 62.4013   | 0.0 | D370 | D(114,113,124,125) | 93.5159   | 0.0 |
| D371 | D(114,113,124,126) | -26.149   | 0.0 | D384 | D(115,114,128,130) | -153.5403 | 0.0 |
| D372 | D(114,113,124,127) | -146.5109 | 0.0 | D385 | D(115,114,128,131) | 86.8064   | 0.0 |
| D373 | D(113,114,115,111) | 0.2919    | 0.0 | D386 | D(2,115,132,133)   | -64.9235  | 0.0 |

|      |                    |           |     |      |                    |           |     |
|------|--------------------|-----------|-----|------|--------------------|-----------|-----|
| D374 | D(113,114,115,132) | 175.7124  | 0.0 | D387 | D(2,115,132,134)   | 175.2392  | 0.0 |
| D375 | D(128,114,115,111) | -174.4794 | 0.0 | D388 | D(2,115,132,135)   | 55.2898   | 0.0 |
| D376 | D(128,114,115,132) | 0.941     | 0.0 | D389 | D(111,115,132,133) | -156.9079 | 0.0 |
| D377 | D(2,114,128,129)   | 59.8496   | 0.0 | D390 | D(111,115,132,134) | 83.2549   | 0.0 |
| D378 | D(2,114,128,130)   | -60.7521  | 0.0 | D391 | D(111,115,132,135) | -36.6946  | 0.0 |
| D379 | D(2,114,128,131)   | 179.5946  | 0.0 | D392 | D(114,115,132,133) | 28.4521   | 0.0 |
| D380 | D(113,114,128,129) | 153.1995  | 0.0 | D393 | D(114,115,132,134) | -91.3852  | 0.0 |
| D381 | D(113,114,128,130) | 32.5978   | 0.0 | D394 | D(114,115,132,135) | 148.6653  | 0.0 |
| D382 | D(113,114,128,131) | -87.0555  | 0.0 | D384 | D(115,114,128,130) | -153.5403 | 0.0 |
| D383 | D(115,114,128,129) | -32.9385  | 0.0 |      |                    |           |     |

[1] = Derivative Info -DE/DX =

### Standard Orientation of 3

| Center Number | Atomic Number | Atomic Type | Coordinates(Angstroms) |           |           |
|---------------|---------------|-------------|------------------------|-----------|-----------|
|               |               |             | X                      | Y         | Z         |
| 1             | 30            | 0           | 0.764133               | -0.094033 | 0.066474  |
| 2             | 30            | 0           | 3.081368               | -0.623492 | -0.070460 |
| 3             | 15            | 0           | -2.355149              | -1.074932 | 0.431756  |
| 4             | 15            | 0           | -1.664411              | 1.929183  | -0.177560 |
| 5             | 7             | 0           | -0.775290              | -1.444073 | 0.093388  |
| 6             | 7             | 0           | -0.032839              | 1.785754  | 0.045098  |
| 7             | 6             | 0           | -2.584994              | 0.629865  | 0.501812  |
| 8             | 1             | 0           | -3.530898              | 0.920219  | 0.961830  |
| 9             | 6             | 0           | -2.327797              | 3.483948  | 0.542512  |
| 10            | 6             | 0           | -3.014051              | 3.487978  | 1.767365  |
| 11            | 1             | 0           | -3.187791              | 2.550230  | 2.297488  |
| 12            | 6             | 0           | -3.471454              | 4.688308  | 2.319104  |
| 13            | 1             | 0           | -4.009667              | 4.675011  | 3.270214  |
| 14            | 6             | 0           | -3.238041              | 5.898868  | 1.661366  |
| 15            | 1             | 0           | -3.593467              | 6.836879  | 2.095481  |
| 16            | 6             | 0           | -2.547483              | 5.905468  | 0.445757  |
| 17            | 1             | 0           | -2.358764              | 6.847909  | -0.074187 |
| 18            | 6             | 0           | -2.096695              | 4.706759  | -0.110996 |
| 19            | 1             | 0           | -1.570983              | 4.726721  | -1.067078 |

|    |   |   |           |          |           |
|----|---|---|-----------|----------|-----------|
| 20 | 6 | 0 | -2.044352 | 2.084281 | -1.988637 |
| 21 | 6 | 0 | -3.304119 | 2.563067 | -2.393401 |
| 22 | 1 | 0 | -4.019399 | 2.917966 | -1.646879 |
| 23 | 6 | 0 | -3.654657 | 2.596113 | -3.744486 |
| 24 | 1 | 0 | -4.632476 | 2.984361 | -4.041677 |
| 25 | 6 | 0 | -2.757618 | 2.135118 | -4.714901 |
| 26 | 1 | 0 | -3.031210 | 2.160203 | -5.772757 |
| 27 | 6 | 0 | -1.510591 | 1.643720 | -4.322558 |
| 28 | 1 | 0 | -0.803138 | 1.281316 | -5.072782 |
| 29 | 6 | 0 | -1.154867 | 1.621913 | -2.969005 |
| 30 | 1 | 0 | -0.171767 | 1.251275 | -2.675474 |
| 31 | 6 | 0 | 0.810658  | 2.799861 | 0.614517  |
| 32 | 6 | 0 | 1.466915  | 3.761202 | -0.209147 |
| 33 | 6 | 0 | 2.346536  | 4.683240 | 0.374873  |
| 34 | 1 | 0 | 2.850376  | 5.416230 | -0.258396 |
| 35 | 6 | 0 | 2.600785  | 4.684022 | 1.744232  |
| 36 | 1 | 0 | 3.293022  | 5.409877 | 2.178817  |
| 37 | 6 | 0 | 1.959349  | 3.749509 | 2.550150  |
| 38 | 1 | 0 | 2.155091  | 3.748606 | 3.625472  |
| 39 | 6 | 0 | 1.064025  | 2.809600 | 2.017715  |
| 40 | 6 | 0 | 1.274966  | 3.780721 | -1.721143 |
| 41 | 1 | 0 | 0.294750  | 3.335890 | -1.923820 |
| 42 | 6 | 0 | 1.262090  | 5.188516 | -2.336876 |
| 43 | 1 | 0 | 0.558829  | 5.857639 | -1.815648 |
| 44 | 1 | 0 | 0.960046  | 5.134880 | -3.395514 |
| 45 | 1 | 0 | 2.254766  | 5.666628 | -2.310923 |
| 46 | 6 | 0 | 2.321551  | 2.894991 | -2.419850 |
| 47 | 1 | 0 | 3.335181  | 3.304764 | -2.276335 |
| 48 | 1 | 0 | 2.131949  | 2.837294 | -3.504984 |
| 49 | 1 | 0 | 2.318418  | 1.872720 | -2.012783 |
| 50 | 6 | 0 | 0.415676  | 1.817345 | 2.980625  |
| 51 | 1 | 0 | -0.331126 | 1.250955 | 2.405404  |
| 52 | 6 | 0 | -0.327810 | 2.514615 | 4.133766  |
| 53 | 1 | 0 | 0.367725  | 3.036838 | 4.811040  |
| 54 | 1 | 0 | -0.878845 | 1.776508 | 4.740733  |
| 55 | 1 | 0 | -1.049135 | 3.256391 | 3.761135  |

|    |   |   |           |           |           |
|----|---|---|-----------|-----------|-----------|
| 56 | 6 | 0 | 1.443230  | 0.812506  | 3.535183  |
| 57 | 1 | 0 | 1.960606  | 0.277775  | 2.723592  |
| 58 | 1 | 0 | 0.954133  | 0.062786  | 4.179910  |
| 59 | 1 | 0 | 2.212724  | 1.320371  | 4.139649  |
| 60 | 6 | 0 | -0.360606 | -2.758932 | -0.313788 |
| 61 | 6 | 0 | 0.021882  | -3.733552 | 0.653175  |
| 62 | 6 | 0 | 0.449227  | -4.998052 | 0.220833  |
| 63 | 1 | 0 | 0.737209  | -5.745540 | 0.964744  |
| 64 | 6 | 0 | 0.528696  | -5.318848 | -1.131645 |
| 65 | 1 | 0 | 0.862578  | -6.310747 | -1.447483 |
| 66 | 6 | 0 | 0.194811  | -4.352290 | -2.076799 |
| 67 | 1 | 0 | 0.280860  | -4.593920 | -3.139046 |
| 68 | 6 | 0 | -0.244377 | -3.074903 | -1.700221 |
| 69 | 6 | 0 | 0.038319  | -3.441088 | 2.150589  |
| 70 | 1 | 0 | -0.396682 | -2.445680 | 2.286991  |
| 71 | 6 | 0 | -0.808638 | -4.434699 | 2.962318  |
| 72 | 1 | 0 | -0.398845 | -5.457019 | 2.913421  |
| 73 | 1 | 0 | -1.848009 | -4.470934 | 2.602207  |
| 74 | 1 | 0 | -0.834024 | -4.141157 | 4.024244  |
| 75 | 6 | 0 | 1.476791  | -3.376662 | 2.693199  |
| 76 | 1 | 0 | 1.476442  | -3.098785 | 3.760642  |
| 77 | 1 | 0 | 2.071826  | -2.630064 | 2.146375  |
| 78 | 1 | 0 | 1.990254  | -4.347713 | 2.600849  |
| 79 | 6 | 0 | -0.516917 | -2.053500 | -2.802776 |
| 80 | 1 | 0 | -1.004154 | -1.188453 | -2.333648 |
| 81 | 6 | 0 | -1.461346 | -2.569396 | -3.900471 |
| 82 | 1 | 0 | -1.004541 | -3.384340 | -4.485790 |
| 83 | 1 | 0 | -1.701248 | -1.756816 | -4.605512 |
| 84 | 1 | 0 | -2.406335 | -2.942109 | -3.481707 |
| 85 | 6 | 0 | 0.806367  | -1.563365 | -3.422130 |
| 86 | 1 | 0 | 1.474423  | -1.135058 | -2.658765 |
| 87 | 1 | 0 | 0.620797  | -0.795070 | -4.190892 |
| 88 | 1 | 0 | 1.349616  | -2.392540 | -3.904604 |
| 89 | 6 | 0 | -3.013394 | -1.641719 | 2.081232  |
| 90 | 6 | 0 | -2.392351 | -1.122763 | 3.232385  |
| 91 | 1 | 0 | -1.537592 | -0.452615 | 3.124341  |

|     |   |   |           |           |           |
|-----|---|---|-----------|-----------|-----------|
| 92  | 6 | 0 | -2.864622 | -1.437684 | 4.506390  |
| 93  | 1 | 0 | -2.364073 | -1.027976 | 5.387567  |
| 94  | 6 | 0 | -3.982650 | -2.267557 | 4.654618  |
| 95  | 1 | 0 | -4.358302 | -2.510642 | 5.651931  |
| 96  | 6 | 0 | -4.619268 | -2.774210 | 3.521208  |
| 97  | 1 | 0 | -5.500201 | -3.412914 | 3.625482  |
| 98  | 6 | 0 | -4.138356 | -2.464826 | 2.242203  |
| 99  | 1 | 0 | -4.660695 | -2.862022 | 1.371894  |
| 100 | 6 | 0 | -3.473410 | -1.945614 | -0.760227 |
| 101 | 6 | 0 | -3.528031 | -3.350012 | -0.846428 |
| 102 | 1 | 0 | -2.882705 | -3.968657 | -0.220418 |
| 103 | 6 | 0 | -4.412380 | -3.969924 | -1.732960 |
| 104 | 1 | 0 | -4.445108 | -5.061002 | -1.788544 |
| 105 | 6 | 0 | -5.247471 | -3.199379 | -2.549502 |
| 106 | 1 | 0 | -5.938169 | -3.687159 | -3.242324 |
| 107 | 6 | 0 | -5.191566 | -1.805164 | -2.478502 |
| 108 | 1 | 0 | -5.836179 | -1.195857 | -3.117212 |
| 109 | 6 | 0 | -4.311792 | -1.182786 | -1.586884 |
| 110 | 1 | 0 | -4.269989 | -0.093122 | -1.527104 |
| 111 | 6 | 0 | 5.175135  | -0.817853 | 0.944867  |
| 112 | 6 | 0 | 4.887596  | -2.070851 | 0.305777  |
| 113 | 6 | 0 | 4.804233  | -1.839320 | -1.105552 |
| 114 | 6 | 0 | 5.050759  | -0.446267 | -1.342239 |
| 115 | 6 | 0 | 5.275735  | 0.185641  | -0.074795 |
| 116 | 6 | 0 | 5.450859  | -0.610370 | 2.408622  |
| 117 | 1 | 0 | 5.154137  | 0.395362  | 2.744870  |
| 118 | 1 | 0 | 6.526931  | -0.720265 | 2.639927  |
| 119 | 1 | 0 | 4.913150  | -1.336587 | 3.037557  |
| 120 | 6 | 0 | 4.837371  | -3.419197 | 0.968717  |
| 121 | 1 | 0 | 4.090512  | -4.082764 | 0.505542  |
| 122 | 1 | 0 | 4.590402  | -3.344362 | 2.037987  |
| 123 | 1 | 0 | 5.812891  | -3.936113 | 0.899628  |
| 124 | 6 | 0 | 4.612388  | -2.900798 | -2.153314 |
| 125 | 1 | 0 | 5.563449  | -3.411228 | -2.395386 |
| 126 | 1 | 0 | 4.226452  | -2.481706 | -3.095024 |
| 127 | 1 | 0 | 3.903371  | -3.678616 | -1.829086 |

|     |   |   |          |           |           |
|-----|---|---|----------|-----------|-----------|
| 128 | 6 | 0 | 5.178339 | 0.209002  | -2.689682 |
| 129 | 1 | 0 | 4.897638 | 1.272464  | -2.659688 |
| 130 | 1 | 0 | 4.542418 | -0.275110 | -3.447084 |
| 131 | 1 | 0 | 6.217026 | 0.161322  | -3.066657 |
| 132 | 6 | 0 | 5.660930 | 1.622641  | 0.145450  |
| 133 | 1 | 0 | 5.290316 | 2.276570  | -0.658457 |
| 134 | 1 | 0 | 6.759211 | 1.749272  | 0.182533  |
| 135 | 1 | 0 | 5.260136 | 2.018232  | 1.091523  |

### Summary of Natural Population Analysis: Natural Population of 3

| Atom | No | Natural Charge | Core     | Valence  | Rydberg | Total    |
|------|----|----------------|----------|----------|---------|----------|
| Zn   | 1  | 0.76170        | 17.99727 | 11.23571 | 0.00533 | 29.23830 |
| Zn   | 2  | 0.57419        | 17.99800 | 11.42131 | 0.00651 | 29.42581 |
| P    | 3  | 1.82342        | 9.99695  | 3.09630  | 0.08333 | 13.17658 |
| P    | 4  | 1.82735        | 9.99692  | 3.09272  | 0.08301 | 13.17265 |
| N    | 5  | -1.18585       | 1.99941  | 6.17637  | 0.01008 | 8.18585  |
| N    | 6  | -1.20390       | 1.99939  | 6.19439  | 0.01013 | 8.20390  |
| C    | 7  | -1.38537       | 1.99883  | 5.37353  | 0.01301 | 7.38537  |
| H    | 8  | 0.28408        | 0.00000  | 0.71311  | 0.00281 | 0.71592  |
| C    | 9  | -0.37106       | 1.99880  | 4.34870  | 0.02356 | 6.37106  |
| C    | 10 | -0.19924       | 1.99888  | 4.18282  | 0.01753 | 6.19924  |
| H    | 11 | 0.23961        | 0.00000  | 0.75719  | 0.00320 | 0.76039  |
| C    | 12 | -0.21631       | 1.99891  | 4.20194  | 0.01546 | 6.21631  |
| H    | 13 | 0.22785        | 0.00000  | 0.76950  | 0.00265 | 0.77215  |
| C    | 14 | -0.20151       | 1.99893  | 4.18745  | 0.01513 | 6.20151  |
| H    | 15 | 0.22627        | 0.00000  | 0.77108  | 0.00265 | 0.77373  |
| C    | 16 | -0.21172       | 1.99892  | 4.19727  | 0.01553 | 6.21172  |
| H    | 17 | 0.22807        | 0.00000  | 0.76928  | 0.00265 | 0.77193  |
| C    | 18 | -0.18945       | 1.99890  | 4.17314  | 0.01741 | 6.18945  |
| H    | 19 | 0.23326        | 0.00000  | 0.76317  | 0.00357 | 0.76674  |
| C    | 20 | -0.37511       | 1.99878  | 4.34762  | 0.02870 | 6.37511  |
| C    | 21 | -0.21115       | 1.99887  | 4.19541  | 0.01686 | 6.21115  |
| H    | 22 | 0.23153        | 0.00000  | 0.76550  | 0.00297 | 0.76847  |

|   |    |          |         |         |         |         |
|---|----|----------|---------|---------|---------|---------|
| C | 23 | -0.21699 | 1.99892 | 4.20244 | 0.01564 | 6.21699 |
| H | 24 | 0.22525  | 0.00000 | 0.77205 | 0.00270 | 0.77475 |
| C | 25 | -0.21137 | 1.99893 | 4.19717 | 0.01527 | 6.21137 |
| H | 26 | 0.22519  | 0.00000 | 0.77216 | 0.00265 | 0.77481 |
| C | 27 | -0.21344 | 1.99891 | 4.19894 | 0.01560 | 6.21344 |
| H | 28 | 0.22722  | 0.00000 | 0.77012 | 0.00266 | 0.77278 |
| C | 29 | -0.21505 | 1.99887 | 4.19696 | 0.01922 | 6.21505 |
| H | 30 | 0.23491  | 0.00000 | 0.76056 | 0.00453 | 0.76509 |
| C | 31 | 0.18647  | 1.99869 | 3.79128 | 0.02356 | 5.81353 |
| C | 32 | -0.03646 | 1.99878 | 4.01764 | 0.02005 | 6.03646 |
| C | 33 | -0.22359 | 1.99888 | 4.20968 | 0.01503 | 6.22359 |
| H | 34 | 0.21703  | 0.00000 | 0.77987 | 0.00311 | 0.78297 |
| C | 35 | -0.21534 | 1.99890 | 4.20054 | 0.01590 | 6.21534 |
| H | 36 | 0.21867  | 0.00000 | 0.77853 | 0.00279 | 0.78133 |
| C | 37 | -0.22250 | 1.99888 | 4.20823 | 0.01539 | 6.22250 |
| H | 38 | 0.21558  | 0.00000 | 0.78133 | 0.00309 | 0.78442 |
| C | 39 | -0.03592 | 1.99879 | 4.01714 | 0.01999 | 6.03592 |
| C | 40 | -0.24949 | 1.99893 | 4.23619 | 0.01437 | 6.24949 |
| H | 41 | 0.22935  | 0.00000 | 0.76372 | 0.00693 | 0.77065 |
| C | 42 | -0.62288 | 1.99924 | 4.61354 | 0.01011 | 6.62288 |
| H | 43 | 0.21336  | 0.00000 | 0.78407 | 0.00256 | 0.78664 |
| H | 44 | 0.21787  | 0.00000 | 0.77961 | 0.00252 | 0.78213 |
| H | 45 | 0.20821  | 0.00000 | 0.78910 | 0.00270 | 0.79179 |
| C | 46 | -0.61718 | 1.99920 | 4.60793 | 0.01005 | 6.61718 |
| H | 47 | 0.21092  | 0.00000 | 0.78639 | 0.00269 | 0.78908 |
| H | 48 | 0.21048  | 0.00000 | 0.78684 | 0.00268 | 0.78952 |
| H | 49 | 0.21846  | 0.00000 | 0.77690 | 0.00463 | 0.78154 |
| C | 50 | -0.25966 | 1.99896 | 4.24611 | 0.01458 | 6.25966 |
| H | 51 | 0.22806  | 0.00000 | 0.76538 | 0.00656 | 0.77194 |
| C | 52 | -0.61348 | 1.99922 | 4.60405 | 0.01021 | 6.61348 |
| H | 53 | 0.20783  | 0.00000 | 0.78958 | 0.00259 | 0.79217 |
| H | 54 | 0.20841  | 0.00000 | 0.78894 | 0.00264 | 0.79159 |
| H | 55 | 0.21923  | 0.00000 | 0.77794 | 0.00283 | 0.78077 |
| C | 56 | -0.61779 | 1.99921 | 4.60851 | 0.01007 | 6.61779 |
| H | 57 | 0.21513  | 0.00000 | 0.78063 | 0.00424 | 0.78487 |
| H | 58 | 0.20924  | 0.00000 | 0.78818 | 0.00258 | 0.79076 |

|   |    |          |         |         |         |         |
|---|----|----------|---------|---------|---------|---------|
| H | 59 | 0.21208  | 0.00000 | 0.78535 | 0.00256 | 0.78792 |
| C | 60 | 0.17312  | 1.99869 | 3.80527 | 0.02292 | 5.82688 |
| C | 61 | -0.03769 | 1.99877 | 4.01864 | 0.02029 | 6.03769 |
| C | 62 | -0.22492 | 1.99888 | 4.21080 | 0.01524 | 6.22492 |
| H | 63 | 0.21769  | 0.00000 | 0.77925 | 0.00306 | 0.78231 |
| C | 64 | -0.21800 | 1.99890 | 4.20315 | 0.01596 | 6.21800 |
| H | 65 | 0.21944  | 0.00000 | 0.77776 | 0.00280 | 0.78056 |
| C | 66 | -0.22271 | 1.99887 | 4.20853 | 0.01531 | 6.22271 |
| H | 67 | 0.21747  | 0.00000 | 0.77946 | 0.00307 | 0.78253 |
| C | 68 | -0.03300 | 1.99878 | 4.01375 | 0.02046 | 6.03300 |
| C | 69 | -0.25187 | 1.99893 | 4.23782 | 0.01511 | 6.25187 |
| H | 70 | 0.23228  | 0.00000 | 0.76086 | 0.00686 | 0.76772 |
| C | 71 | -0.61604 | 1.99922 | 4.60658 | 0.01025 | 6.61604 |
| H | 72 | 0.20522  | 0.00000 | 0.79218 | 0.00261 | 0.79478 |
| H | 73 | 0.21579  | 0.00000 | 0.78142 | 0.00279 | 0.78421 |
| H | 74 | 0.21529  | 0.00000 | 0.78215 | 0.00256 | 0.78471 |
| C | 75 | -0.61355 | 1.99921 | 4.60417 | 0.01018 | 6.61355 |
| H | 76 | 0.21089  | 0.00000 | 0.78654 | 0.00257 | 0.78911 |
| H | 77 | 0.21623  | 0.00000 | 0.77914 | 0.00463 | 0.78377 |
| H | 78 | 0.20787  | 0.00000 | 0.78950 | 0.00263 | 0.79213 |
| C | 79 | -0.25369 | 1.99895 | 4.23968 | 0.01506 | 6.25369 |
| H | 80 | 0.23035  | 0.00000 | 0.76314 | 0.00651 | 0.76965 |
| C | 81 | -0.61296 | 1.99921 | 4.60346 | 0.01029 | 6.61296 |
| H | 82 | 0.20278  | 0.00000 | 0.79462 | 0.00261 | 0.79722 |
| H | 83 | 0.21399  | 0.00000 | 0.78350 | 0.00251 | 0.78601 |
| H | 84 | 0.21957  | 0.00000 | 0.77648 | 0.00395 | 0.78043 |
| C | 85 | -0.61649 | 1.99920 | 4.60729 | 0.00999 | 6.61649 |
| H | 86 | 0.21316  | 0.00000 | 0.78230 | 0.00453 | 0.78684 |
| H | 87 | 0.20603  | 0.00000 | 0.79119 | 0.00279 | 0.79397 |
| H | 88 | 0.21306  | 0.00000 | 0.78434 | 0.00260 | 0.78694 |
| C | 89 | -0.37248 | 1.99880 | 4.34426 | 0.02942 | 6.37248 |
| C | 90 | -0.19485 | 1.99888 | 4.17809 | 0.01788 | 6.19485 |
| H | 91 | 0.23040  | 0.00000 | 0.76545 | 0.00415 | 0.76960 |
| C | 92 | -0.21919 | 1.99891 | 4.20472 | 0.01557 | 6.21919 |
| H | 93 | 0.22629  | 0.00000 | 0.77101 | 0.00270 | 0.77371 |
| C | 94 | -0.20559 | 1.99893 | 4.19149 | 0.01517 | 6.20559 |



|   |     |          |         |         |         |         |
|---|-----|----------|---------|---------|---------|---------|
| H | 95  | 0.22495  | 0.00000 | 0.77239 | 0.00266 | 0.77505 |
| C | 96  | -0.21715 | 1.99892 | 4.20263 | 0.01560 | 6.21715 |
| H | 97  | 0.22560  | 0.00000 | 0.77169 | 0.00270 | 0.77440 |
| C | 98  | -0.20379 | 1.99887 | 4.18829 | 0.01663 | 6.20379 |
| H | 99  | 0.23576  | 0.00000 | 0.76098 | 0.00326 | 0.76424 |
| C | 100 | -0.38858 | 1.99881 | 4.36137 | 0.02841 | 6.38858 |
| C | 101 | -0.21010 | 1.99889 | 4.19311 | 0.01810 | 6.21010 |
| H | 102 | 0.24079  | 0.00000 | 0.75591 | 0.00330 | 0.75921 |
| C | 103 | -0.21893 | 1.99890 | 4.20438 | 0.01566 | 6.21893 |
| H | 104 | 0.22841  | 0.00000 | 0.76890 | 0.00269 | 0.77159 |
| C | 105 | -0.20964 | 1.99892 | 4.19562 | 0.01510 | 6.20964 |
| H | 106 | 0.22513  | 0.00000 | 0.77219 | 0.00268 | 0.77487 |
| C | 107 | -0.21794 | 1.99892 | 4.20342 | 0.01561 | 6.21794 |
| H | 108 | 0.22543  | 0.00000 | 0.77180 | 0.00277 | 0.77457 |
| C | 109 | -0.19200 | 1.99886 | 4.17634 | 0.01680 | 6.19200 |
| H | 110 | 0.23718  | 0.00000 | 0.75896 | 0.00386 | 0.76282 |
| C | 111 | -0.16496 | 1.99883 | 4.14138 | 0.02475 | 6.16496 |
| C | 112 | -0.16209 | 1.99882 | 4.13866 | 0.02461 | 6.16209 |
| C | 113 | -0.16192 | 1.99882 | 4.13873 | 0.02437 | 6.16192 |
| C | 114 | -0.15998 | 1.99882 | 4.13678 | 0.02438 | 6.15998 |
| C | 115 | -0.16435 | 1.99882 | 4.14109 | 0.02444 | 6.16435 |
| C | 116 | -0.62930 | 1.99919 | 4.62056 | 0.00955 | 6.62930 |
| H | 117 | 0.22084  | 0.00000 | 0.77665 | 0.00251 | 0.77916 |
| H | 118 | 0.21709  | 0.00000 | 0.77955 | 0.00337 | 0.78291 |
| H | 119 | 0.21898  | 0.00000 | 0.77864 | 0.00239 | 0.78102 |
| C | 120 | -0.63085 | 1.99919 | 4.62182 | 0.00985 | 6.63085 |
| H | 121 | 0.22365  | 0.00000 | 0.77379 | 0.00256 | 0.77635 |
| H | 122 | 0.21854  | 0.00000 | 0.77890 | 0.00256 | 0.78146 |
| H | 123 | 0.21707  | 0.00000 | 0.77955 | 0.00338 | 0.78293 |
| C | 124 | -0.63053 | 1.99919 | 4.62168 | 0.00966 | 6.63053 |
| H | 125 | 0.21597  | 0.00000 | 0.78064 | 0.00339 | 0.78403 |
| H | 126 | 0.21790  | 0.00000 | 0.77964 | 0.00245 | 0.78210 |
| H | 127 | 0.22463  | 0.00000 | 0.77285 | 0.00252 | 0.77537 |
| C | 128 | -0.62746 | 1.99918 | 4.61879 | 0.00949 | 6.62746 |
| H | 129 | 0.21849  | 0.00000 | 0.77875 | 0.00276 | 0.78151 |
| H | 130 | 0.21835  | 0.00000 | 0.77926 | 0.00239 | 0.78165 |

|   |     |          |         |         |         |         |
|---|-----|----------|---------|---------|---------|---------|
| H | 131 | 0.21736  | 0.00000 | 0.77931 | 0.00333 | 0.78264 |
| C | 132 | -0.62911 | 1.99919 | 4.62015 | 0.00978 | 6.62911 |
| H | 133 | 0.21934  | 0.00000 | 0.77821 | 0.00245 | 0.78066 |
| H | 134 | 0.21534  | 0.00000 | 0.78130 | 0.00337 | 0.78466 |
| H | 135 | 0.22353  | 0.00000 | 0.77397 | 0.00250 | 0.77647 |

Total 0.00000 177.92533 348.67363 1.40104 528.00000

### Natural Population of 3

|                       |                             |
|-----------------------|-----------------------------|
| Core                  | 177.92533 (99.9580% of 178) |
| Valence               | 348.67363 (99.6210% of 350) |
| Natural Minimal Basis | 526.59896 (99.7347% of 528) |
| Natural Rydberg Basis | 1.40104 (0.2653% of 528)    |

| Atom | No | Natural Electron Configuration             |
|------|----|--------------------------------------------|
| Zn   | 1  | [core] 4S(0.84) 3d(9.95) 4p(0.45)          |
| Zn   | 2  | [core] 4S(1.00) 3d(9.94) 4p(0.47) 5S(0.01) |
| P    | 3  | [core] 3S(0.91) 3p(2.19) 3d(0.06) 4p(0.02) |
| P    | 4  | [core] 3S(0.90) 3p(2.19) 3d(0.06) 4p(0.02) |
| N    | 5  | [core] 2S(1.41) 2p(4.77) 3p(0.01)          |
| N    | 6  | [core] 2S(1.40) 2p(4.80) 3p(0.01)          |
| C    | 7  | [core] 2S(1.13) 2p(4.25) 3p(0.01)          |
| H    | 8  | 1S(0.71)                                   |
| C    | 9  | [core] 2S(0.95) 2p(3.40) 3p(0.02)          |
| C    | 10 | [core] 2S(0.93) 2p(3.25) 3p(0.01)          |

## Calculated Structure and Atom Numbering Scheme of 1

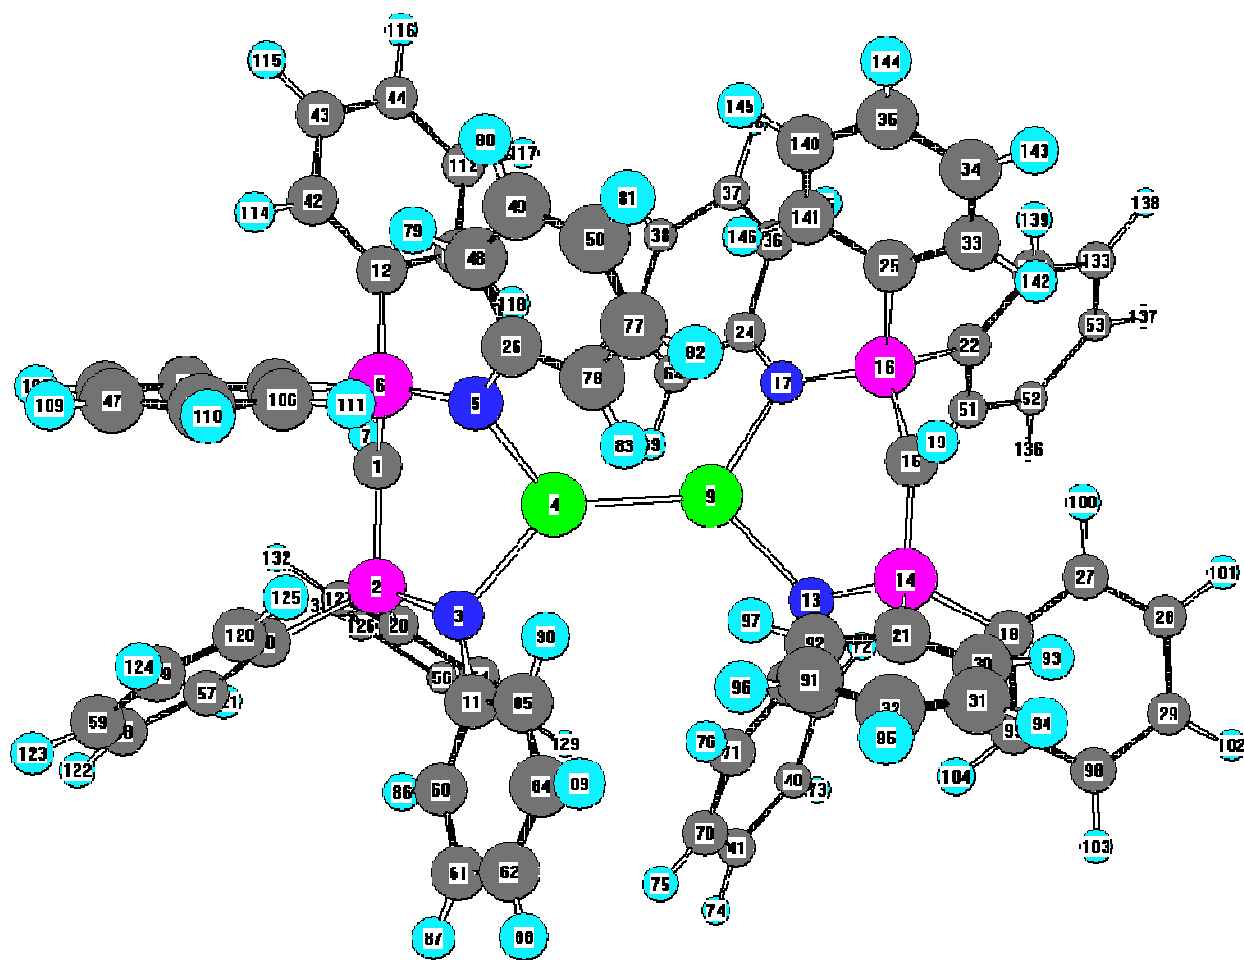

HF=-7997.5154371

### Optimized Parameters (Angstroms and Degrees) Compound 1

| Name | Definition | Value  | [1] | Definition | Value     | [1]    |     |
|------|------------|--------|-----|------------|-----------|--------|-----|
| R1   | R(1,2)     | 1.736  | 0.0 | R41        | R(21,92)  | 1.4041 | 0.0 |
| R2   | R(1,6)     | 1.7402 | 0.0 | R42        | R(22,51)  | 1.4069 | 0.0 |
| R3   | R(1,7)     | 1.0908 | 0.0 | R43        | R(22,134) | 1.4034 | 0.0 |
| R4   | R(2,3)     | 1.6393 | 0.0 | R44        | R(23,39)  | 1.4102 | 0.0 |
| R5   | R(2,10)    | 1.8481 | 0.0 | R45        | R(23,71)  | 1.4108 | 0.0 |
| R6   | R(2,20)    | 1.8396 | 0.0 | R46        | R(24,36)  | 1.4151 | 0.0 |
| R7   | R(3,4)     | 2.0992 | 0.0 | R47        | R(24,64)  | 1.4165 | 0.0 |
| R8   | R(3,11)    | 1.3967 | 0.0 | R48        | R(25,33)  | 1.4066 | 0.0 |
| R9   | R(4,5)     | 2.1019 | 0.0 | R49        | R(25,141) | 1.4029 | 0.0 |
| R10  | R(4,9)     | 2.3964 | 0.0 | R50        | R(26,48)  | 1.4158 | 0.0 |
| R11  | R(5,6)     | 1.6457 | 0.0 | R51        | R(26,78)  | 1.4167 | 0.0 |
| R12  | R(5,26)    | 1.3967 | 0.0 | R52        | R(27,28)  | 1.3989 | 0.0 |
| R13  | R(6,8)     | 1.8436 | 0.0 | R53        | R(27,100) | 1.0919 | 0.0 |
| R14  | R(6,12)    | 1.8427 | 0.0 | R54        | R(28,29)  | 1.3973 | 0.0 |
| R15  | R(8,45)    | 1.406  | 0.0 | R55        | R(28,101) | 1.0931 | 0.0 |
| R16  | R(8,106)   | 1.4034 | 0.0 | R56        | R(29,98)  | 1.3995 | 0.0 |
| R17  | R(9,13)    | 2.0843 | 0.0 | R57        | R(29,102) | 1.0933 | 0.0 |
| R18  | R(9,17)    | 2.0805 | 0.0 | R58        | R(30,31)  | 1.3985 | 0.0 |
| R19  | R(10,57)   | 1.4044 | 0.0 | R59        | R(30,93)  | 1.0923 | 0.0 |
| R20  | R(10,120)  | 1.4066 | 0.0 | R60        | R(31,32)  | 1.3978 | 0.0 |
| R21  | R(11,60)   | 1.4139 | 0.0 | R61        | R(31,94)  | 1.0932 | 0.0 |
| R22  | R(11,85)   | 1.4152 | 0.0 | R62        | R(32,91)  | 1.3987 | 0.0 |
| R23  | R(12,42)   | 1.4036 | 0.0 | R63        | R(32,95)  | 1.0932 | 0.0 |
| R24  | R(12,113)  | 1.4064 | 0.0 | R64        | R(33,34)  | 1.397  | 0.0 |
| R25  | R(13,14)   | 1.6347 | 0.0 | R65        | R(33,142) | 1.0929 | 0.0 |
| R26  | R(13,23)   | 1.4131 | 0.0 | R66        | R(34,35)  | 1.3993 | 0.0 |
| R27  | R(14,15)   | 1.73   | 0.0 | R67        | R(34,143) | 1.0932 | 0.0 |
| R28  | R(14,18)   | 1.8445 | 0.0 | R68        | R(35,140) | 1.397  | 0.0 |
| R29  | R(14,21)   | 1.8471 | 0.0 | R69        | R(35,144) | 1.0931 | 0.0 |
| R30  | R(15,16)   | 1.7335 | 0.0 | R70        | R(36,37)  | 1.3969 | 0.0 |
| R31  | R(15,19)   | 1.0909 | 0.0 | R71        | R(36,65)  | 1.0907 | 0.0 |
| R32  | R(16,17)   | 1.6456 | 0.0 | R72        | R(37,38)  | 1.398  | 0.0 |
| R33  | R(16,22)   | 1.8511 | 0.0 | R73        | R(37,66)  | 1.0939 | 0.0 |
| R34  | R(16,25)   | 1.8393 | 0.0 | R74        | R(38,63)  | 1.4    | 0.0 |
| R35  | R(17,24)   | 1.3987 | 0.0 | R75        | R(38,67)  | 1.0927 | 0.0 |
| R36  | R(18,27)   | 1.4025 | 0.0 | R76        | R(39,40)  | 1.397  | 0.0 |
| R37  | R(18,99)   | 1.4074 | 0.0 | R77        | R(39,72)  | 1.0921 | 0.0 |
| R38  | R(20,54)   | 1.4031 | 0.0 | R78        | R(40,41)  | 1.3994 | 0.0 |
| R39  | R(20,127)  | 1.4068 | 0.0 | R79        | R(40,73)  | 1.0938 | 0.0 |
| R40  | R(21,30)   | 1.4038 | 0.0 | R80        | R(41,70)  | 1.3993 | 0.0 |

|      |           |        |     |      |            |        |     |
|------|-----------|--------|-----|------|------------|--------|-----|
| R81  | R(41,74)  | 1.0932 | 0.0 | R122 | R(61,87)   | 1.0939 | 0.0 |
| R82  | R(42,43)  | 1.3986 | 0.0 | R123 | R(62,84)   | 1.3995 | 0.0 |
| R83  | R(42,114) | 1.0915 | 0.0 | R124 | R(62,88)   | 1.0925 | 0.0 |
| R84  | R(43,44)  | 1.3976 | 0.0 | R125 | R(63,64)   | 1.394  | 0.0 |
| R85  | R(43,115) | 1.0931 | 0.0 | R126 | R(63,68)   | 1.0937 | 0.0 |
| R86  | R(44,112) | 1.3988 | 0.0 | R127 | R(64,69)   | 1.0927 | 0.0 |
| R87  | R(44,116) | 1.0932 | 0.0 | R128 | R(70,71)   | 1.3977 | 0.0 |
| R88  | R(45,46)  | 1.396  | 0.0 | R129 | R(70,75)   | 1.0933 | 0.0 |
| R89  | R(45,107) | 1.0931 | 0.0 | R130 | R(71,76)   | 1.0913 | 0.0 |
| R90  | R(46,47)  | 1.3995 | 0.0 | R131 | R(77,78)   | 1.3931 | 0.0 |
| R91  | R(46,108) | 1.093  | 0.0 | R132 | R(77,82)   | 1.0937 | 0.0 |
| R92  | R(47,105) | 1.3973 | 0.0 | R133 | R(78,83)   | 1.0925 | 0.0 |
| R93  | R(47,109) | 1.0932 | 0.0 | R134 | R(84,85)   | 1.3945 | 0.0 |
| R94  | R(48,49)  | 1.3972 | 0.0 | R135 | R(84,89)   | 1.0938 | 0.0 |
| R95  | R(48,79)  | 1.0904 | 0.0 | R136 | R(85,90)   | 1.0931 | 0.0 |
| R96  | R(49,50)  | 1.3973 | 0.0 | R137 | R(91,92)   | 1.3968 | 0.0 |
| R97  | R(49,80)  | 1.094  | 0.0 | R138 | R(91,96)   | 1.0927 | 0.0 |
| R98  | R(50,77)  | 1.3999 | 0.0 | R139 | R(92,97)   | 1.0932 | 0.0 |
| R99  | R(50,81)  | 1.0926 | 0.0 | R140 | R(98,99)   | 1.3965 | 0.0 |
| R100 | R(51,52)  | 1.3954 | 0.0 | R141 | R(98,103)  | 1.0931 | 0.0 |
| R101 | R(51,135) | 1.0927 | 0.0 | R142 | R(99,104)  | 1.0922 | 0.0 |
| R102 | R(52,53)  | 1.3993 | 0.0 | R143 | R(105,106) | 1.3993 | 0.0 |
| R103 | R(52,136) | 1.093  | 0.0 | R144 | R(105,110) | 1.093  | 0.0 |
| R104 | R(53,133) | 1.3968 | 0.0 | R145 | R(106,111) | 1.0906 | 0.0 |
| R105 | R(53,137) | 1.0931 | 0.0 | R146 | R(112,113) | 1.3968 | 0.0 |
| R106 | R(54,55)  | 1.3991 | 0.0 | R147 | R(112,117) | 1.0926 | 0.0 |
| R107 | R(54,128) | 1.0917 | 0.0 | R148 | R(113,118) | 1.0925 | 0.0 |
| R108 | R(55,56)  | 1.397  | 0.0 | R149 | R(119,120) | 1.3954 | 0.0 |
| R109 | R(55,129) | 1.0926 | 0.0 | R150 | R(119,124) | 1.0927 | 0.0 |
| R110 | R(56,126) | 1.3996 | 0.0 | R151 | R(120,125) | 1.0916 | 0.0 |
| R111 | R(56,130) | 1.0932 | 0.0 | R152 | R(121,132) | 2.4994 | 0.0 |
| R112 | R(57,58)  | 1.3989 | 0.0 | R153 | R(126,127) | 1.3969 | 0.0 |
| R113 | R(57,121) | 1.091  | 0.0 | R154 | R(126,131) | 1.0932 | 0.0 |
| R114 | R(58,59)  | 1.3968 | 0.0 | R155 | R(127,132) | 1.0932 | 0.0 |
| R115 | R(58,122) | 1.0932 | 0.0 | R156 | R(133,134) | 1.3994 | 0.0 |
| R116 | R(59,119) | 1.3988 | 0.0 | R157 | R(133,138) | 1.0932 | 0.0 |
| R117 | R(59,123) | 1.0931 | 0.0 | R158 | R(134,139) | 1.0911 | 0.0 |
| R118 | R(60,61)  | 1.397  | 0.0 | R159 | R(140,141) | 1.3986 | 0.0 |
| R119 | R(60,76)  | 3.8682 | 0.0 | R160 | R(140,145) | 1.0924 | 0.0 |
| R120 | R(60,86)  | 1.0912 | 0.0 | R161 | R(141,146) | 1.0918 | 0.0 |
| R121 | R(61,62)  | 1.3977 | 0.0 |      |            |        |     |

[1] = Derivative Info -DE/DX =

### Standard Orientation of 1

| Center Number | Atomic Number | Atomic Type | Coordinates(Angstroms) |           |           |
|---------------|---------------|-------------|------------------------|-----------|-----------|
|               |               |             | X                      | Y         | Z         |
| 1             | 6             | 0           | -3.499490              | 0.411103  | -1.211921 |
| 2             | 15            | 0           | -3.595666              | -1.308834 | -0.996596 |
| 3             | 7             | 0           | -2.617935              | -1.671522 | 0.268174  |
| 4             | 30            | 0           | -1.212767              | -0.114752 | 0.361689  |
| 5             | 7             | 0           | -2.429677              | 1.428992  | 1.105987  |
| 6             | 15            | 0           | -3.622731              | 1.657927  | -0.004226 |
| 7             | 1             | 0           | -3.505921              | 0.765038  | -2.243636 |
| 8             | 6             | 0           | -5.274976              | 1.720436  | 0.811190  |
| 9             | 30            | 0           | 1.137405               | -0.097994 | -0.106639 |
| 10            | 6             | 0           | -5.265410              | -2.030373 | -0.669954 |
| 11            | 6             | 0           | -2.559898              | -2.856435 | 1.005388  |
| 12            | 6             | 0           | -3.432826              | 3.231882  | -0.943473 |
| 13            | 7             | 0           | 2.551565               | -1.629176 | -0.103867 |
| 14            | 15            | 0           | 3.743769               | -1.316460 | 0.969905  |
| 15            | 6             | 0           | 3.841531               | 0.397669  | 1.182506  |
| 16            | 15            | 0           | 3.671344               | 1.667848  | 0.015125  |
| 17            | 7             | 0           | 2.317955               | 1.425971  | -0.889149 |
| 18            | 6             | 0           | 5.310887               | -2.164960 | 0.494171  |
| 19            | 1             | 0           | 4.054946               | 0.732273  | 2.198614  |
| 20            | 6             | 0           | -3.040614              | -1.986296 | -2.614367 |
| 21            | 6             | 0           | 3.412080               | -1.981951 | 2.660732  |
| 22            | 6             | 0           | 5.081424               | 1.861814  | -1.168345 |
| 23            | 6             | 0           | 2.295497               | -2.864652 | -0.740271 |
| 24            | 6             | 0           | 1.979197               | 2.093831  | -2.070529 |
| 25            | 6             | 0           | 3.603501               | 3.186781  | 1.050064  |
| 26            | 6             | 0           | -2.044249              | 2.291531  | 2.134632  |
| 27            | 6             | 0           | 6.466810               | -1.415516 | 0.231392  |
| 28            | 6             | 0           | 7.656449               | -2.052483 | -0.137440 |
| 29            | 6             | 0           | 7.701354               | -3.445016 | -0.243147 |
| 30            | 6             | 0           | 4.443226               | -2.374472 | 3.528696  |
| 31            | 6             | 0           | 4.147964               | -2.805085 | 4.826058  |
| 32            | 6             | 0           | 2.821639               | -2.851592 | 5.264765  |
| 33            | 6             | 0           | 4.660480               | 3.552411  | 1.903120  |
| 34            | 6             | 0           | 4.536958               | 4.663299  | 2.741064  |
| 35            | 6             | 0           | 3.354910               | 5.412123  | 2.743545  |
| 36            | 6             | 0           | 2.461312               | 3.372752  | -2.437194 |
| 37            | 6             | 0           | 2.071176               | 3.978581  | -3.633936 |
| 38            | 6             | 0           | 1.177333               | 3.346217  | -4.503142 |

|    |   |   |           |           |           |
|----|---|---|-----------|-----------|-----------|
| 39 | 6 | 0 | 2.912252  | -3.185424 | -1.967209 |
| 40 | 6 | 0 | 2.617883  | -4.378038 | -2.632426 |
| 41 | 6 | 0 | 1.690618  | -5.278384 | -2.095962 |
| 42 | 6 | 0 | -4.390241 | 4.257998  | -0.967342 |
| 43 | 6 | 0 | -4.145356 | 5.432898  | -1.685541 |
| 44 | 6 | 0 | -2.944301 | 5.594433  | -2.381645 |
| 45 | 6 | 0 | -6.437925 | 1.763664  | 0.022206  |
| 46 | 6 | 0 | -7.699829 | 1.759004  | 0.619276  |
| 47 | 6 | 0 | -7.815011 | 1.693473  | 2.012538  |
| 48 | 6 | 0 | -2.588206 | 3.579088  | 2.360105  |
| 49 | 6 | 0 | -2.142611 | 4.379254  | 3.415209  |
| 50 | 6 | 0 | -1.140216 | 3.936873  | 4.282352  |
| 51 | 6 | 0 | 5.201889  | 0.882068  | -2.170779 |
| 52 | 6 | 0 | 6.250994  | 0.930497  | -3.089527 |
| 53 | 6 | 0 | 7.194654  | 1.961642  | -3.025067 |
| 54 | 6 | 0 | -1.876502 | -2.768644 | -2.653155 |
| 55 | 6 | 0 | -1.381737 | -3.238221 | -3.874761 |
| 56 | 6 | 0 | -2.042135 | -2.925344 | -5.065424 |
| 57 | 6 | 0 | -5.991648 | -2.778239 | -1.610974 |
| 58 | 6 | 0 | -7.259728 | -3.277240 | -1.294756 |
| 59 | 6 | 0 | -7.814505 | -3.041668 | -0.034694 |
| 60 | 6 | 0 | -2.967235 | -4.123151 | 0.527339  |
| 61 | 6 | 0 | -2.855516 | -5.265380 | 1.323902  |
| 62 | 6 | 0 | -2.328487 | -5.191583 | 2.616374  |
| 63 | 6 | 0 | 0.680728  | 2.085329  | -4.151782 |
| 64 | 6 | 0 | 1.076229  | 1.469231  | -2.965456 |
| 65 | 1 | 0 | 3.148164  | 3.905271  | -1.778239 |
| 66 | 1 | 0 | 2.473907  | 4.964176  | -3.885097 |
| 67 | 1 | 0 | 0.877152  | 3.823028  | -5.439338 |
| 68 | 1 | 0 | -0.017702 | 1.566111  | -4.814177 |
| 69 | 1 | 0 | 0.686442  | 0.479003  | -2.717236 |
| 70 | 6 | 0 | 1.059535  | -4.968069 | -0.886249 |
| 71 | 6 | 0 | 1.356995  | -3.778238 | -0.215799 |
| 72 | 1 | 0 | 3.630735  | -2.480922 | -2.391548 |
| 73 | 1 | 0 | 3.116739  | -4.604301 | -3.579184 |
| 74 | 1 | 0 | 1.461333  | -6.212296 | -2.615794 |
| 75 | 1 | 0 | 0.325209  | -5.653920 | -0.455356 |
| 76 | 1 | 0 | 0.852075  | -3.542024 | 0.722390  |
| 77 | 6 | 0 | -0.587136 | 2.668146  | 4.071961  |
| 78 | 6 | 0 | -1.029751 | 1.862249  | 3.025410  |
| 79 | 1 | 0 | -3.367656 | 3.965531  | 1.702843  |
| 80 | 1 | 0 | -2.591584 | 5.366935  | 3.556083  |

|     |   |   |           |           |           |
|-----|---|---|-----------|-----------|-----------|
| 81  | 1 | 0 | -0.796720 | 4.566092  | 5.106870  |
| 82  | 1 | 0 | 0.201107  | 2.296982  | 4.733047  |
| 83  | 1 | 0 | -0.581165 | 0.877888  | 2.872780  |
| 84  | 6 | 0 | -1.922236 | -3.945050 | 3.106009  |
| 85  | 6 | 0 | -2.040133 | -2.798923 | 2.320410  |
| 86  | 1 | 0 | -3.371503 | -4.218329 | -0.481742 |
| 87  | 1 | 0 | -3.183754 | -6.228167 | 0.921598  |
| 88  | 1 | 0 | -2.240186 | -6.088304 | 3.234176  |
| 89  | 1 | 0 | -1.519044 | -3.862049 | 4.119390  |
| 90  | 1 | 0 | -1.749053 | -1.825054 | 2.722628  |
| 91  | 6 | 0 | 1.789561  | -2.462975 | 4.404386  |
| 92  | 6 | 0 | 2.082454  | -2.028275 | 3.109624  |
| 93  | 1 | 0 | 5.482414  | -2.347715 | 3.193199  |
| 94  | 1 | 0 | 4.957921  | -3.108202 | 5.494763  |
| 95  | 1 | 0 | 2.591330  | -3.192914 | 6.277439  |
| 96  | 1 | 0 | 0.750567  | -2.500403 | 4.740615  |
| 97  | 1 | 0 | 1.275014  | -1.721450 | 2.439618  |
| 98  | 6 | 0 | 6.554716  | -4.201436 | 0.024736  |
| 99  | 6 | 0 | 5.365997  | -3.567636 | 0.392873  |
| 100 | 1 | 0 | 6.429990  | -0.328019 | 0.322149  |
| 101 | 1 | 0 | 8.549946  | -1.456361 | -0.340149 |
| 102 | 1 | 0 | 8.631144  | -3.943682 | -0.529656 |
| 103 | 1 | 0 | 6.586031  | -5.291342 | -0.052146 |
| 104 | 1 | 0 | 4.480588  | -4.170547 | 0.606168  |
| 105 | 6 | 0 | -6.664581 | 1.627098  | 2.802772  |
| 106 | 6 | 0 | -5.398577 | 1.639795  | 2.206817  |
| 107 | 1 | 0 | -6.354502 | 1.781885  | -1.067527 |
| 108 | 1 | 0 | -8.596706 | 1.792893  | -0.004528 |
| 109 | 1 | 0 | -8.803069 | 1.685326  | 2.480200  |
| 110 | 1 | 0 | -6.748584 | 1.564889  | 3.890791  |
| 111 | 1 | 0 | -4.504950 | 1.580115  | 2.829165  |
| 112 | 6 | 0 | -1.981492 | 4.580095  | -2.355270 |
| 113 | 6 | 0 | -2.221243 | 3.407168  | -1.635722 |
| 114 | 1 | 0 | -5.329564 | 4.149488  | -0.422145 |
| 115 | 1 | 0 | -4.898390 | 6.225203  | -1.697846 |
| 116 | 1 | 0 | -2.756017 | 6.513905  | -2.942212 |
| 117 | 1 | 0 | -1.036917 | 4.693457  | -2.892523 |
| 118 | 1 | 0 | -1.457586 | 2.626161  | -1.613780 |
| 119 | 6 | 0 | -7.093174 | -2.308094 | 0.913072  |
| 120 | 6 | 0 | -5.828407 | -1.808601 | 0.599870  |
| 121 | 1 | 0 | -5.567497 | -2.990448 | -2.593486 |
| 122 | 1 | 0 | -7.811005 | -3.860206 | -2.037288 |



|     |   |   |           |           |           |
|-----|---|---|-----------|-----------|-----------|
| 123 | 1 | 0 | -8.804007 | -3.435256 | 0.212133  |
| 124 | 1 | 0 | -7.514514 | -2.125646 | 1.904675  |
| 125 | 1 | 0 | -5.269684 | -1.247956 | 1.351552  |
| 126 | 6 | 0 | -3.196849 | -2.134949 | -5.036234 |
| 127 | 6 | 0 | -3.693602 | -1.664858 | -3.818256 |
| 128 | 1 | 0 | -1.342634 | -2.999003 | -1.729167 |
| 129 | 1 | 0 | -0.471637 | -3.842710 | -3.885250 |
| 130 | 1 | 0 | -1.654195 | -3.290516 | -6.019971 |
| 131 | 1 | 0 | -3.710574 | -1.879575 | -5.966785 |
| 132 | 1 | 0 | -4.589505 | -1.038445 | -3.810138 |
| 133 | 6 | 0 | 7.077075  | 2.945747  | -2.040769 |
| 134 | 6 | 0 | 6.025128  | 2.899437  | -1.119057 |
| 135 | 1 | 0 | 4.459512  | 0.082711  | -2.233557 |
| 136 | 1 | 0 | 6.328825  | 0.162644  | -3.863448 |
| 137 | 1 | 0 | 8.014621  | 2.001606  | -3.746821 |
| 138 | 1 | 0 | 7.802166  | 3.762461  | -1.991988 |
| 139 | 1 | 0 | 5.938697  | 3.689228  | -0.371202 |
| 140 | 6 | 0 | 2.294643  | 5.043360  | 1.911989  |
| 141 | 6 | 0 | 2.416672  | 3.934536  | 1.068429  |
| 142 | 1 | 0 | 5.579842  | 2.961902  | 1.926248  |
| 143 | 1 | 0 | 5.363547  | 4.940555  | 3.400530  |
| 144 | 1 | 0 | 3.257696  | 6.277856  | 3.403832  |
| 145 | 1 | 0 | 1.360057  | 5.608799  | 1.927029  |
| 146 | 1 | 0 | 1.579395  | 3.634121  | 0.435385  |

### Summary of Natural Population Analysis: Natural Population of 1

| Atom | No | Natural Charge | Core     | Valence  | Rydberg | Total    |
|------|----|----------------|----------|----------|---------|----------|
| C    | 1  | -1.36335       | 1.99892  | 5.35028  | 0.01415 | 7.36335  |
| P    | 2  | 1.80241        | 9.99704  | 3.11432  | 0.08622 | 13.19759 |
| N    | 3  | -1.13624       | 1.99933  | 6.12484  | 0.01207 | 8.13624  |
| Zn   | 4  | 0.65226        | 17.99776 | 11.34550 | 0.00448 | 29.34774 |
| N    | 5  | -1.12548       | 1.99933  | 6.11383  | 0.01232 | 8.12548  |
| P    | 6  | 1.80089        | 9.99704  | 3.11676  | 0.08531 | 13.19911 |
| H    | 7  | 0.28599        | 0.00000  | 0.71129  | 0.00272 | 0.71401  |
| C    | 8  | -0.38867       | 1.99880  | 4.36287  | 0.02701 | 6.38867  |
| Zn   | 9  | 0.68014        | 17.99761 | 11.31810 | 0.00415 | 29.31986 |
| C    | 10 | -0.37868       | 1.99880  | 4.35262  | 0.02726 | 6.37868  |
| C    | 11 | 0.19227        | 1.99885  | 3.78627  | 0.02260 | 5.80773  |
| C    | 12 | -0.37658       | 1.99882  | 4.35144  | 0.02631 | 6.37658  |

|   |    |          |         |         |         |          |
|---|----|----------|---------|---------|---------|----------|
| N | 13 | -1.17325 | 1.99934 | 6.16181 | 0.01210 | 8.17325  |
| P | 14 | 1.81602  | 9.99697 | 3.10004 | 0.08696 | 13.18398 |
| C | 15 | -1.36499 | 1.99888 | 5.35315 | 0.01297 | 7.36499  |
| P | 16 | 1.80553  | 9.99705 | 3.11218 | 0.08525 | 13.19447 |
| N | 17 | -1.13839 | 1.99934 | 6.12705 | 0.01201 | 8.13839  |
| C | 18 | -0.39160 | 1.99880 | 4.36505 | 0.02775 | 6.39160  |
| H | 19 | 0.28597  | 0.00000 | 0.71140 | 0.00263 | 0.71403  |
| C | 20 | -0.37928 | 1.99882 | 4.35274 | 0.02773 | 6.37928  |
| C | 21 | -0.37729 | 1.99880 | 4.34909 | 0.02940 | 6.37729  |
| C | 22 | -0.37671 | 1.99879 | 4.35039 | 0.02753 | 6.37671  |
| C | 23 | 0.17194  | 1.99881 | 3.80614 | 0.02311 | 5.82806  |
| C | 24 | 0.19193  | 1.99886 | 3.78699 | 0.02221 | 5.80807  |
| C | 25 | -0.37707 | 1.99882 | 4.35131 | 0.02694 | 6.37707  |
| C | 26 | 0.18910  | 1.99886 | 3.78961 | 0.02243 | 5.81090  |
| C | 27 | -0.19669 | 1.99887 | 4.18065 | 0.01718 | 6.19669  |
| C | 28 | -0.21936 | 1.99892 | 4.20479 | 0.01565 | 6.21936  |
| C | 29 | -0.20967 | 1.99893 | 4.19567 | 0.01506 | 6.20967  |
| C | 30 | -0.20262 | 1.99888 | 4.18731 | 0.01643 | 6.20262  |
| C | 31 | -0.21798 | 1.99893 | 4.20342 | 0.01563 | 6.21798  |
| C | 32 | -0.20785 | 1.99893 | 4.19385 | 0.01506 | 6.20785  |
| C | 33 | -0.21783 | 1.99889 | 4.20224 | 0.01670 | 6.21783  |
| C | 34 | -0.21786 | 1.99892 | 4.20324 | 0.01570 | 6.21786  |
| C | 35 | -0.20713 | 1.99893 | 4.19317 | 0.01503 | 6.20713  |
| C | 36 | -0.27274 | 1.99890 | 4.25896 | 0.01488 | 6.27274  |
| C | 37 | -0.21204 | 1.99893 | 4.19780 | 0.01531 | 6.21204  |
| C | 38 | -0.26817 | 1.99891 | 4.25343 | 0.01583 | 6.26817  |
| C | 39 | -0.23688 | 1.99885 | 4.22171 | 0.01632 | 6.23688  |
| C | 40 | -0.22270 | 1.99892 | 4.20872 | 0.01506 | 6.22270  |
| C | 41 | -0.25241 | 1.99892 | 4.23803 | 0.01547 | 6.25241  |
| C | 42 | -0.20870 | 1.99887 | 4.19339 | 0.01644 | 6.20870  |
| C | 43 | -0.21793 | 1.99892 | 4.20334 | 0.01567 | 6.21793  |
| C | 44 | -0.20714 | 1.99893 | 4.19321 | 0.01500 | 6.20714  |
| C | 45 | -0.20191 | 1.99888 | 4.18604 | 0.01699 | 6.20191  |
| C | 46 | -0.21698 | 1.99891 | 4.20230 | 0.01576 | 6.21698  |
| C | 47 | -0.20801 | 1.99893 | 4.19388 | 0.01520 | 6.20801  |
| C | 48 | -0.28085 | 1.99890 | 4.26769 | 0.01425 | 6.28085  |
| C | 49 | -0.21103 | 1.99894 | 4.19682 | 0.01528 | 6.21103  |
| C | 50 | -0.26527 | 1.99892 | 4.25069 | 0.01566 | 6.26527  |
| C | 51 | -0.19494 | 1.99888 | 4.17849 | 0.01756 | 6.19494  |
| C | 52 | -0.21041 | 1.99892 | 4.19588 | 0.01561 | 6.21041  |
| C | 53 | -0.21204 | 1.99893 | 4.19799 | 0.01512 | 6.21204  |
| C | 54 | -0.19379 | 1.99887 | 4.17699 | 0.01793 | 6.19379  |

|   |    |          |         |         |         |         |
|---|----|----------|---------|---------|---------|---------|
| C | 55 | -0.20736 | 1.99892 | 4.19273 | 0.01572 | 6.20736 |
| C | 56 | -0.20841 | 1.99893 | 4.19446 | 0.01501 | 6.20841 |
| C | 57 | -0.20575 | 1.99888 | 4.19065 | 0.01622 | 6.20575 |
| C | 58 | -0.21762 | 1.99893 | 4.20306 | 0.01563 | 6.21762 |
| C | 59 | -0.20968 | 1.99893 | 4.19566 | 0.01509 | 6.20968 |
| C | 60 | -0.26914 | 1.99890 | 4.25553 | 0.01472 | 6.26914 |
| C | 61 | -0.21082 | 1.99893 | 4.19666 | 0.01523 | 6.21082 |
| C | 62 | -0.25768 | 1.99892 | 4.24323 | 0.01553 | 6.25768 |
| C | 63 | -0.21444 | 1.99893 | 4.19995 | 0.01556 | 6.21444 |
| C | 64 | -0.25484 | 1.99889 | 4.24018 | 0.01578 | 6.25484 |
| H | 65 | 0.21921  | 0.00000 | 0.77733 | 0.00346 | 0.78079 |
| H | 66 | 0.21835  | 0.00000 | 0.77882 | 0.00284 | 0.78165 |
| H | 67 | 0.21834  | 0.00000 | 0.77898 | 0.00267 | 0.78166 |
| H | 68 | 0.22095  | 0.00000 | 0.77620 | 0.00285 | 0.77905 |
| H | 69 | 0.21806  | 0.00000 | 0.77826 | 0.00368 | 0.78194 |
| C | 70 | -0.22077 | 1.99893 | 4.20630 | 0.01555 | 6.22077 |
| C | 71 | -0.24004 | 1.99884 | 4.22561 | 0.01559 | 6.24004 |
| H | 72 | 0.22336  | 0.00000 | 0.77356 | 0.00308 | 0.77664 |
| H | 73 | 0.21935  | 0.00000 | 0.77783 | 0.00282 | 0.78065 |
| H | 74 | 0.21940  | 0.00000 | 0.77792 | 0.00269 | 0.78060 |
| H | 75 | 0.22695  | 0.00000 | 0.77014 | 0.00291 | 0.77305 |
| H | 76 | 0.23320  | 0.00000 | 0.76329 | 0.00351 | 0.76680 |
| C | 77 | -0.20999 | 1.99893 | 4.19574 | 0.01531 | 6.20999 |
| C | 78 | -0.25183 | 1.99890 | 4.23703 | 0.01589 | 6.25183 |
| H | 79 | 0.21695  | 0.00000 | 0.77942 | 0.00363 | 0.78305 |
| H | 80 | 0.21674  | 0.00000 | 0.78040 | 0.00286 | 0.78326 |
| H | 81 | 0.21655  | 0.00000 | 0.78074 | 0.00271 | 0.78345 |
| H | 82 | 0.21983  | 0.00000 | 0.77734 | 0.00283 | 0.78017 |
| H | 83 | 0.21377  | 0.00000 | 0.78263 | 0.00360 | 0.78623 |
| C | 84 | -0.21467 | 1.99893 | 4.20063 | 0.01511 | 6.21467 |
| C | 85 | -0.25346 | 1.99889 | 4.23885 | 0.01572 | 6.25346 |
| H | 86 | 0.21930  | 0.00000 | 0.77734 | 0.00336 | 0.78070 |
| H | 87 | 0.21857  | 0.00000 | 0.77860 | 0.00283 | 0.78143 |
| H | 88 | 0.21818  | 0.00000 | 0.77913 | 0.00269 | 0.78182 |
| H | 89 | 0.21569  | 0.00000 | 0.78143 | 0.00288 | 0.78431 |
| H | 90 | 0.21681  | 0.00000 | 0.77976 | 0.00344 | 0.78319 |
| C | 91 | -0.21370 | 1.99892 | 4.19919 | 0.01558 | 6.21370 |
| C | 92 | -0.19363 | 1.99888 | 4.17684 | 0.01791 | 6.19363 |
| H | 93 | 0.23285  | 0.00000 | 0.76420 | 0.00295 | 0.76715 |
| H | 94 | 0.22411  | 0.00000 | 0.77318 | 0.00271 | 0.77589 |
| H | 95 | 0.22356  | 0.00000 | 0.77377 | 0.00267 | 0.77644 |
| H | 96 | 0.22452  | 0.00000 | 0.77258 | 0.00291 | 0.77548 |

|   |     |          |         |         |         |         |
|---|-----|----------|---------|---------|---------|---------|
| H | 97  | 0.23200  | 0.00000 | 0.76298 | 0.00501 | 0.76800 |
| C | 98  | -0.21649 | 1.99892 | 4.20197 | 0.01560 | 6.21649 |
| C | 99  | -0.19592 | 1.99889 | 4.17963 | 0.01739 | 6.19592 |
| H | 100 | 0.23831  | 0.00000 | 0.75796 | 0.00373 | 0.76169 |
| H | 101 | 0.22503  | 0.00000 | 0.77224 | 0.00273 | 0.77497 |
| H | 102 | 0.22305  | 0.00000 | 0.77427 | 0.00268 | 0.77695 |
| H | 103 | 0.22590  | 0.00000 | 0.77140 | 0.00270 | 0.77410 |
| H | 104 | 0.23834  | 0.00000 | 0.75868 | 0.00298 | 0.76166 |
| C | 105 | -0.21768 | 1.99892 | 4.20313 | 0.01562 | 6.21768 |
| C | 106 | -0.19483 | 1.99887 | 4.17813 | 0.01782 | 6.19483 |
| H | 107 | 0.23384  | 0.00000 | 0.76313 | 0.00303 | 0.76616 |
| H | 108 | 0.22620  | 0.00000 | 0.77110 | 0.00270 | 0.77380 |
| H | 109 | 0.22456  | 0.00000 | 0.77277 | 0.00267 | 0.77544 |
| H | 110 | 0.22753  | 0.00000 | 0.76979 | 0.00268 | 0.77247 |
| H | 111 | 0.24660  | 0.00000 | 0.75005 | 0.00335 | 0.75340 |
| C | 112 | -0.20778 | 1.99892 | 4.19310 | 0.01577 | 6.20778 |
| C | 113 | -0.18832 | 1.99889 | 4.17193 | 0.01750 | 6.18832 |
| H | 114 | 0.23300  | 0.00000 | 0.76397 | 0.00302 | 0.76700 |
| H | 115 | 0.22414  | 0.00000 | 0.77316 | 0.00270 | 0.77586 |
| H | 116 | 0.22367  | 0.00000 | 0.77366 | 0.00267 | 0.77633 |
| H | 117 | 0.23711  | 0.00000 | 0.75976 | 0.00314 | 0.76289 |
| H | 118 | 0.24224  | 0.00000 | 0.75337 | 0.00439 | 0.75776 |
| C | 119 | -0.20985 | 1.99892 | 4.19534 | 0.01559 | 6.20985 |
| C | 120 | -0.18891 | 1.99889 | 4.17172 | 0.01830 | 6.18891 |
| H | 121 | 0.23088  | 0.00000 | 0.76606 | 0.00305 | 0.76912 |
| H | 122 | 0.22366  | 0.00000 | 0.77362 | 0.00272 | 0.77634 |
| H | 123 | 0.22302  | 0.00000 | 0.77431 | 0.00268 | 0.77698 |
| H | 124 | 0.22651  | 0.00000 | 0.77074 | 0.00275 | 0.77349 |
| H | 125 | 0.23594  | 0.00000 | 0.75978 | 0.00428 | 0.76406 |
| C | 126 | -0.21748 | 1.99892 | 4.20282 | 0.01574 | 6.21748 |
| C | 127 | -0.21858 | 1.99889 | 4.20303 | 0.01665 | 6.21858 |
| H | 128 | 0.24621  | 0.00000 | 0.74944 | 0.00435 | 0.75379 |
| H | 129 | 0.23498  | 0.00000 | 0.76205 | 0.00297 | 0.76502 |
| H | 130 | 0.22452  | 0.00000 | 0.77282 | 0.00267 | 0.77548 |
| H | 131 | 0.22518  | 0.00000 | 0.77212 | 0.00270 | 0.77482 |
| H | 132 | 0.23035  | 0.00000 | 0.76680 | 0.00284 | 0.76965 |
| C | 133 | -0.21664 | 1.99893 | 4.20207 | 0.01565 | 6.21664 |
| C | 134 | -0.20857 | 1.99887 | 4.19327 | 0.01643 | 6.20857 |
| H | 135 | 0.23478  | 0.00000 | 0.76041 | 0.00480 | 0.76522 |
| H | 136 | 0.22633  | 0.00000 | 0.77098 | 0.00269 | 0.77367 |
| H | 137 | 0.22345  | 0.00000 | 0.77388 | 0.00267 | 0.77655 |
| H | 138 | 0.22386  | 0.00000 | 0.77343 | 0.00271 | 0.77614 |

|   |     |          |         |         |         |         |
|---|-----|----------|---------|---------|---------|---------|
| H | 139 | 0.23062  | 0.00000 | 0.76639 | 0.00299 | 0.76938 |
| C | 140 | -0.20655 | 1.99892 | 4.19193 | 0.01570 | 6.20655 |
| C | 141 | -0.19025 | 1.99888 | 4.17334 | 0.01803 | 6.19025 |
| H | 142 | 0.23099  | 0.00000 | 0.76609 | 0.00292 | 0.76901 |
| H | 143 | 0.22495  | 0.00000 | 0.77235 | 0.00270 | 0.77505 |
| H | 144 | 0.22443  | 0.00000 | 0.77289 | 0.00268 | 0.77557 |
| H | 145 | 0.23287  | 0.00000 | 0.76437 | 0.00276 | 0.76713 |
| H | 146 | 0.24611  | 0.00000 | 0.75004 | 0.00384 | 0.75389 |

---

\* Total \* 0.00000 231.89889 420.21823 1.88287 654.00000

## Calculated Structure and Atom Numbering Scheme of 5

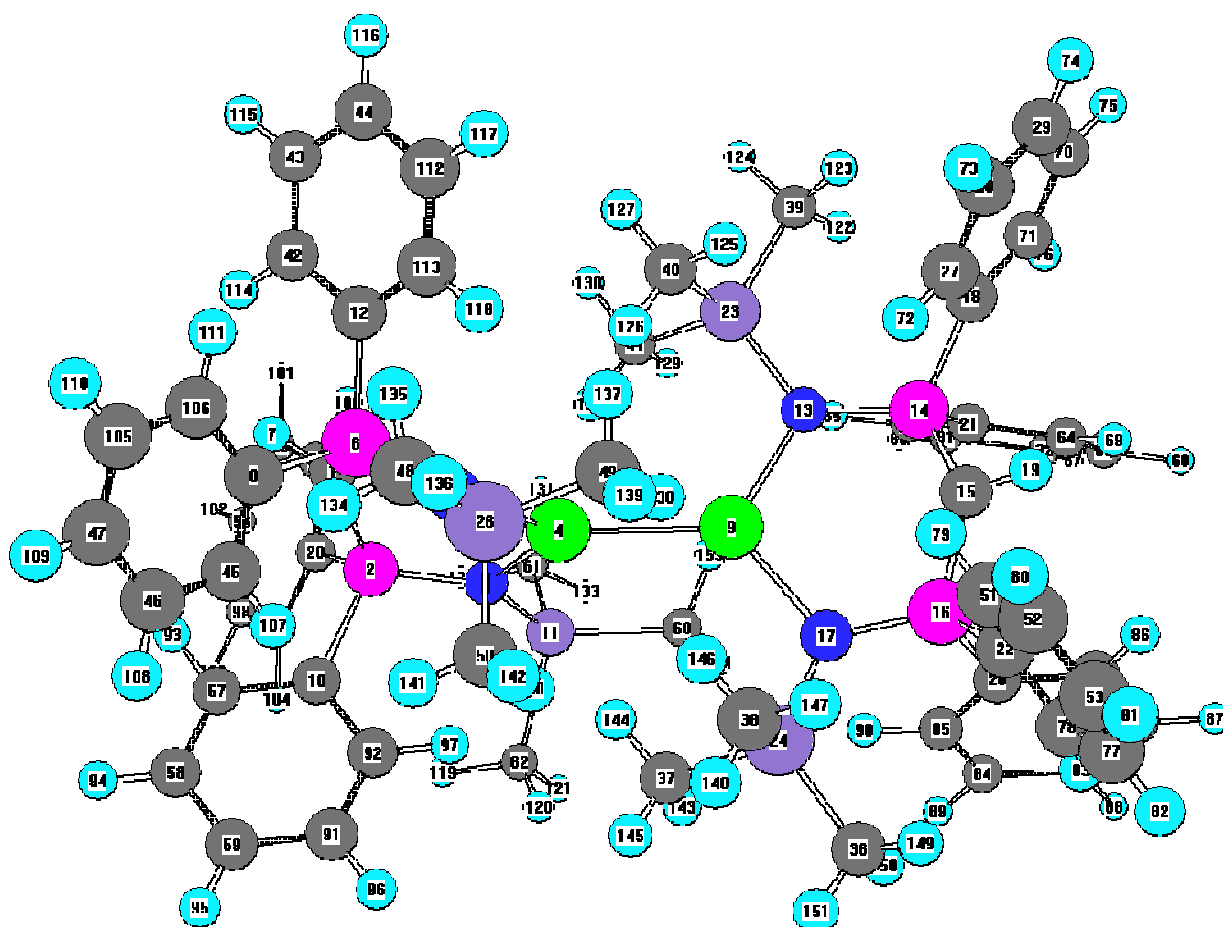

HF=-8708.106859

### Optimized Parameters (Angstroms and Degrees) Compound 5

| Name | Definition | Value  | [1] | Definition | Value     | [1]    |     |
|------|------------|--------|-----|------------|-----------|--------|-----|
| R1   | R(1,2)     | 1.7288 | 0.0 | R41        | R(20,54)  | 1.4061 | 0.0 |
| R2   | R(1,6)     | 1.7258 | 0.0 | R42        | R(20,99)  | 1.4042 | 0.0 |
| R3   | R(1,7)     | 1.0909 | 0.0 | R43        | R(21,30)  | 1.4019 | 0.0 |
| R4   | R(2,3)     | 1.6422 | 0.0 | R44        | R(21,64)  | 1.4059 | 0.0 |
| R5   | R(2,10)    | 1.8556 | 0.0 | R45        | R(22,51)  | 1.407  | 0.0 |
| R6   | R(2,20)    | 1.8475 | 0.0 | R46        | R(22,78)  | 1.4037 | 0.0 |
| R7   | R(3,4)     | 2.1123 | 0.0 | R47        | R(23,39)  | 1.899  | 0.0 |
| R8   | R(3,11)    | 1.7709 | 0.0 | R48        | R(23,40)  | 1.889  | 0.0 |
| R9   | R(4,5)     | 2.113  | 0.0 | R49        | R(23,41)  | 1.8928 | 0.0 |
| R10  | R(4,9)     | 2.4363 | 0.0 | R50        | R(24,36)  | 1.8991 | 0.0 |
| R11  | R(5,6)     | 1.632  | 0.0 | R51        | R(24,37)  | 1.8934 | 0.0 |
| R12  | R(5,26)    | 1.7718 | 0.0 | R52        | R(24,38)  | 1.8918 | 0.0 |
| R13  | R(6,8)     | 1.8595 | 0.0 | R53        | R(24,140) | 3.7316 | 0.0 |
| R14  | R(6,12)    | 1.8505 | 0.0 | R54        | R(25,33)  | 1.4068 | 0.0 |
| R15  | R(8,45)    | 1.4072 | 0.0 | R55        | R(25,85)  | 1.4018 | 0.0 |
| R16  | R(8,106)   | 1.4039 | 0.0 | R56        | R(26,38)  | 4.6522 | 0.0 |
| R17  | R(9,13)    | 2.1002 | 0.0 | R57        | R(26,48)  | 1.897  | 0.0 |
| R18  | R(9,17)    | 2.1002 | 0.0 | R58        | R(26,49)  | 1.8936 | 0.0 |
| R19  | R(9,153)   | 2.8156 | 0.0 | R59        | R(26,50)  | 1.891  | 0.0 |
| R20  | R(10,57)   | 1.4069 | 0.0 | R60        | R(26,146) | 3.6283 | 0.0 |
| R21  | R(10,92)   | 1.402  | 0.0 | R61        | R(26,148) | 4.9044 | 0.0 |
| R22  | R(11,60)   | 1.8896 | 0.0 | R62        | R(27,28)  | 1.3964 | 0.0 |
| R23  | R(11,61)   | 1.8984 | 0.0 | R63        | R(27,72)  | 1.0924 | 0.0 |
| R24  | R(11,62)   | 1.8999 | 0.0 | R64        | R(28,29)  | 1.3993 | 0.0 |
| R25  | R(12,42)   | 1.4069 | 0.0 | R65        | R(28,73)  | 1.0932 | 0.0 |
| R26  | R(12,113)  | 1.4006 | 0.0 | R66        | R(29,70)  | 1.3971 | 0.0 |
| R27  | R(13,14)   | 1.6347 | 0.0 | R67        | R(29,74)  | 1.0932 | 0.0 |
| R28  | R(13,23)   | 1.7697 | 0.0 | R68        | R(30,31)  | 1.3995 | 0.0 |
| R29  | R(13,153)  | 3.1223 | 0.0 | R69        | R(30,65)  | 1.0908 | 0.0 |
| R30  | R(14,15)   | 1.7285 | 0.0 | R70        | R(31,32)  | 1.3966 | 0.0 |
| R31  | R(14,18)   | 1.849  | 0.0 | R71        | R(31,66)  | 1.0932 | 0.0 |
| R32  | R(14,21)   | 1.8551 | 0.0 | R72        | R(32,63)  | 1.3997 | 0.0 |
| R33  | R(15,16)   | 1.7279 | 0.0 | R73        | R(32,67)  | 1.0932 | 0.0 |
| R34  | R(15,19)   | 1.091  | 0.0 | R74        | R(33,34)  | 1.3958 | 0.0 |
| R35  | R(16,17)   | 1.6423 | 0.0 | R75        | R(33,86)  | 1.0933 | 0.0 |
| R36  | R(16,22)   | 1.8513 | 0.0 | R76        | R(34,35)  | 1.4    | 0.0 |
| R37  | R(16,25)   | 1.8546 | 0.0 | R77        | R(34,87)  | 1.0934 | 0.0 |
| R38  | R(17,24)   | 1.7738 | 0.0 | R78        | R(35,84)  | 1.3963 | 0.0 |
| R39  | R(18,27)   | 1.4065 | 0.0 | R79        | R(35,88)  | 1.0932 | 0.0 |
| R40  | R(18,71)   | 1.4025 | 0.0 | R80        | R(36,149) | 1.0992 | 0.0 |

|      |           |        |     |      |           |        |     |
|------|-----------|--------|-----|------|-----------|--------|-----|
| R81  | R(36,150) | 1.1011 | 0.0 | R123 | R(51,72)  | 4.2962 | 0.0 |
| R82  | R(36,151) | 1.1041 | 0.0 | R124 | R(51,79)  | 1.0922 | 0.0 |
| R83  | R(37,143) | 1.102  | 0.0 | R125 | R(52,53)  | 1.3988 | 0.0 |
| R84  | R(37,144) | 1.099  | 0.0 | R126 | R(52,80)  | 1.0931 | 0.0 |
| R85  | R(37,145) | 1.1032 | 0.0 | R127 | R(53,77)  | 1.3971 | 0.0 |
| R86  | R(38,49)  | 4.0076 | 0.0 | R128 | R(53,81)  | 1.0932 | 0.0 |
| R87  | R(38,146) | 1.0997 | 0.0 | R129 | R(54,55)  | 1.3964 | 0.0 |
| R88  | R(38,147) | 1.1019 | 0.0 | R130 | R(54,100) | 1.0921 | 0.0 |
| R89  | R(38,148) | 1.1032 | 0.0 | R131 | R(54,132) | 2.9516 | 0.0 |
| R90  | R(39,122) | 1.1018 | 0.0 | R132 | R(55,56)  | 1.3987 | 0.0 |
| R91  | R(39,123) | 1.0995 | 0.0 | R133 | R(55,101) | 1.0931 | 0.0 |
| R92  | R(39,124) | 1.1041 | 0.0 | R134 | R(56,98)  | 1.3976 | 0.0 |
| R93  | R(40,125) | 1.1026 | 0.0 | R135 | R(56,102) | 1.0931 | 0.0 |
| R94  | R(40,126) | 1.1004 | 0.0 | R136 | R(57,58)  | 1.3955 | 0.0 |
| R95  | R(40,127) | 1.1023 | 0.0 | R137 | R(57,93)  | 1.093  | 0.0 |
| R96  | R(41,128) | 1.0995 | 0.0 | R138 | R(58,59)  | 1.4008 | 0.0 |
| R97  | R(41,129) | 1.1028 | 0.0 | R139 | R(58,94)  | 1.0932 | 0.0 |
| R98  | R(41,130) | 1.1035 | 0.0 | R140 | R(59,91)  | 1.3968 | 0.0 |
| R99  | R(41,131) | 3.1766 | 0.0 | R141 | R(59,95)  | 1.0932 | 0.0 |
| R100 | R(42,43)  | 1.3961 | 0.0 | R142 | R(60,152) | 1.0979 | 0.0 |
| R101 | R(42,114) | 1.0927 | 0.0 | R143 | R(60,153) | 1.1005 | 0.0 |
| R102 | R(43,44)  | 1.3999 | 0.0 | R144 | R(60,154) | 1.1042 | 0.0 |
| R103 | R(43,115) | 1.0932 | 0.0 | R145 | R(61,129) | 3.5838 | 0.0 |
| R104 | R(44,112) | 1.3961 | 0.0 | R146 | R(61,131) | 1.1016 | 0.0 |
| R105 | R(44,116) | 1.0931 | 0.0 | R147 | R(61,132) | 1.0991 | 0.0 |
| R106 | R(45,46)  | 1.3956 | 0.0 | R148 | R(61,133) | 1.1041 | 0.0 |
| R107 | R(45,107) | 1.0913 | 0.0 | R149 | R(62,119) | 1.1014 | 0.0 |
| R108 | R(46,47)  | 1.3999 | 0.0 | R150 | R(62,120) | 1.1021 | 0.0 |
| R109 | R(46,108) | 1.093  | 0.0 | R151 | R(62,121) | 1.1038 | 0.0 |
| R110 | R(47,105) | 1.3963 | 0.0 | R152 | R(63,64)  | 1.396  | 0.0 |
| R111 | R(47,109) | 1.0932 | 0.0 | R153 | R(63,68)  | 1.0932 | 0.0 |
| R112 | R(48,134) | 1.0992 | 0.0 | R154 | R(64,69)  | 1.0931 | 0.0 |
| R113 | R(48,135) | 1.1018 | 0.0 | R155 | R(65,76)  | 4.0574 | 0.0 |
| R114 | R(48,136) | 1.1042 | 0.0 | R156 | R(70,71)  | 1.3991 | 0.0 |
| R115 | R(49,137) | 1.1027 | 0.0 | R157 | R(70,75)  | 1.0931 | 0.0 |
| R116 | R(49,138) | 1.0993 | 0.0 | R158 | R(71,76)  | 1.0911 | 0.0 |
| R117 | R(49,139) | 1.1031 | 0.0 | R159 | R(71,123) | 2.8444 | 0.0 |
| R118 | R(49,146) | 2.9201 | 0.0 | R160 | R(77,78)  | 1.3991 | 0.0 |
| R119 | R(50,140) | 1.1008 | 0.0 | R161 | R(77,82)  | 1.0931 | 0.0 |
| R120 | R(50,141) | 1.1021 | 0.0 | R162 | R(78,83)  | 1.0909 | 0.0 |
| R121 | R(50,142) | 1.1029 | 0.0 | R163 | R(83,86)  | 2.6213 | 0.0 |
| R122 | R(51,52)  | 1.3966 | 0.0 | R123 | R(51,72)  | 4.2962 | 0.0 |



|      |           |        |     |      |            |        |     |
|------|-----------|--------|-----|------|------------|--------|-----|
| R164 | R(84,85)  | 1.3996 | 0.0 | R173 | R(98,103)  | 1.0931 | 0.0 |
| R165 | R(84,89)  | 1.0932 | 0.0 | R174 | R(99,104)  | 1.0914 | 0.0 |
| R166 | R(85,90)  | 1.0908 | 0.0 | R175 | R(105,106) | 1.3996 | 0.0 |
| R167 | R(90,143) | 2.9884 | 0.0 | R176 | R(105,110) | 1.0933 | 0.0 |
| R168 | R(91,92)  | 1.4002 | 0.0 | R177 | R(106,111) | 1.0909 | 0.0 |
| R169 | R(91,96)  | 1.0931 | 0.0 | R178 | R(111,114) | 2.8918 | 0.0 |
| R170 | R(92,97)  | 1.0907 | 0.0 | R179 | R(112,113) | 1.3999 | 0.0 |
| R171 | R(93,104) | 2.7994 | 0.0 | R180 | R(112,117) | 1.0929 | 0.0 |
| R172 | R(98,99)  | 1.3983 | 0.0 | R181 | R(113,118) | 1.0906 | 0.0 |

[1] = Derivative Info -DE/DX =

### Standard Orientation of 5

| Center Number | Atomic Number | Atomic Type | Coordinates(Angstroms) |           |           |
|---------------|---------------|-------------|------------------------|-----------|-----------|
|               |               |             | X                      | Y         | Z         |
| 1             | 6             | 0           | 4.352123               | 0.487665  | 0.855958  |
| 2             | 15            | 0           | 3.807316               | -1.094009 | 1.292266  |
| 3             | 7             | 0           | 2.179486               | -1.299429 | 1.223476  |
| 4             | 30            | 0           | 1.216184               | -0.070356 | -0.198985 |
| 5             | 7             | 0           | 2.716134               | 0.847793  | -1.370264 |
| 6             | 15            | 0           | 4.083874               | 1.333667  | -0.624202 |
| 7             | 1             | 0           | 5.159045               | 0.879858  | 1.476473  |
| 8             | 6             | 0           | 5.545183               | 1.181201  | -1.764030 |
| 9             | 30            | 0           | -1.215941              | 0.026320  | -0.303361 |
| 10            | 6             | 0           | 4.610869               | -2.412192 | 0.262648  |
| 11            | 14            | 0           | 1.254119               | -2.382094 | 2.275860  |
| 12            | 6             | 0           | 4.086410               | 3.134532  | -0.198298 |
| 13            | 7             | 0           | -2.239654              | 1.341955  | 0.974193  |
| 14            | 15            | 0           | -3.870125              | 1.400578  | 0.871920  |
| 15            | 6             | 0           | -4.500088              | 0.676380  | -0.565596 |
| 16            | 15            | 0           | -4.159287              | -0.894888 | -1.198430 |
| 17            | 7             | 0           | -2.557392              | -1.240363 | -1.306884 |
| 18            | 6             | 0           | -4.557926              | 3.115030  | 0.791231  |
| 19            | 1             | 0           | -5.403853              | 1.143744  | -0.959367 |
| 20            | 6             | 0           | 4.523278               | -1.337858 | 2.977823  |
| 21            | 6             | 0           | -4.599763              | 0.666248  | 2.411368  |
| 22            | 6             | 0           | -5.036050              | -0.874401 | -2.828864 |
| 23            | 14            | 0           | -1.195232              | 2.499527  | 1.811436  |
| 24            | 14            | 0           | -1.874995              | -2.408913 | -2.453630 |

|    |    |   |           |           |           |
|----|----|---|-----------|-----------|-----------|
| 25 | 6  | 0 | -4.993099 | -2.223796 | -0.209374 |
| 26 | 14 | 0 | 2.302398  | 0.995300  | -3.086775 |
| 27 | 6  | 0 | -4.217519 | 3.883307  | -0.336712 |
| 28 | 6  | 0 | -4.686428 | 5.191582  | -0.472734 |
| 29 | 6  | 0 | -5.503831 | 5.750152  | 0.516144  |
| 30 | 6  | 0 | -3.788632 | 0.268890  | 3.483509  |
| 31 | 6  | 0 | -4.350002 | -0.315866 | 4.624399  |
| 32 | 6  | 0 | -5.730908 | -0.507705 | 4.706470  |
| 33 | 6  | 0 | -6.389033 | -2.215271 | -0.034940 |
| 34 | 6  | 0 | -7.011973 | -3.169240 | 0.771373  |
| 35 | 6  | 0 | -6.246389 | -4.132496 | 1.439217  |
| 36 | 6  | 0 | -3.012248 | -3.868551 | -2.881200 |
| 37 | 6  | 0 | -0.315183 | -3.217905 | -1.748259 |
| 38 | 6  | 0 | -1.455352 | -1.557299 | -4.089967 |
| 39 | 6  | 0 | -2.105081 | 3.657121  | 3.010692  |
| 40 | 6  | 0 | -0.327137 | 3.586599  | 0.533528  |
| 41 | 6  | 0 | 0.102441  | 1.620082  | 2.872294  |
| 42 | 6  | 0 | 5.041385  | 3.672506  | 0.683781  |
| 43 | 6  | 0 | 5.025958  | 5.030534  | 1.007113  |
| 44 | 6  | 0 | 4.052927  | 5.873255  | 0.456903  |
| 45 | 6  | 0 | 5.843256  | -0.093766 | -2.279632 |
| 46 | 6  | 0 | 6.936753  | -0.284257 | -3.125553 |
| 47 | 6  | 0 | 7.760329  | 0.795472  | -3.465621 |
| 48 | 6  | 0 | 3.466852  | 2.070897  | -4.128681 |
| 49 | 6  | 0 | 0.593156  | 1.788760  | -3.272402 |
| 50 | 6  | 0 | 2.283621  | -0.732020 | -3.856215 |
| 51 | 6  | 0 | -4.774740 | 0.214863  | -3.680214 |
| 52 | 6  | 0 | -5.374997 | 0.295068  | -4.938660 |
| 53 | 6  | 0 | -6.245027 | -0.713064 | -5.366939 |
| 54 | 6  | 0 | 4.471084  | -0.270193 | 3.891393  |
| 55 | 6  | 0 | 4.950301  | -0.426093 | 5.193670  |
| 56 | 6  | 0 | 5.477941  | -1.653696 | 5.607025  |
| 57 | 6  | 0 | 6.010462  | -2.555826 | 0.260029  |
| 58 | 6  | 0 | 6.628187  | -3.493764 | -0.568313 |
| 59 | 6  | 0 | 5.857684  | -4.285474 | -1.429563 |
| 60 | 6  | 0 | -0.602781 | -2.246985 | 1.952710  |
| 61 | 6  | 0 | 1.450540  | -2.002942 | 4.125636  |
| 62 | 6  | 0 | 1.708706  | -4.209651 | 2.025011  |
| 63 | 6  | 0 | -6.549196 | -0.125085 | 3.637218  |
| 64 | 6  | 0 | -5.986099 | 0.447894  | 2.495544  |
| 65 | 1  | 0 | -2.708652 | 0.406141  | 3.416058  |
| 66 | 1  | 0 | -3.702755 | -0.624436 | 5.449561  |

|     |   |   |           |           |           |
|-----|---|---|-----------|-----------|-----------|
| 67  | 1 | 0 | -6.170525 | -0.963402 | 5.597625  |
| 68  | 1 | 0 | -7.629401 | -0.284894 | 3.689544  |
| 69  | 1 | 0 | -6.628407 | 0.720766  | 1.654186  |
| 70  | 6 | 0 | -5.845173 | 4.994722  | 1.640737  |
| 71  | 6 | 0 | -5.372585 | 3.685283  | 1.780221  |
| 72  | 1 | 0 | -3.583695 | 3.446045  | -1.111595 |
| 73  | 1 | 0 | -4.413715 | 5.777631  | -1.354360 |
| 74  | 1 | 0 | -5.872404 | 6.773822  | 0.409863  |
| 75  | 1 | 0 | -6.480948 | 5.425613  | 2.418591  |
| 76  | 1 | 0 | -5.638299 | 3.112271  | 2.669924  |
| 77  | 6 | 0 | -6.507350 | -1.801570 | -4.531357 |
| 78  | 6 | 0 | -5.905060 | -1.884145 | -3.271274 |
| 79  | 1 | 0 | -4.097903 | 1.003928  | -3.345205 |
| 80  | 1 | 0 | -5.162229 | 1.148464  | -5.587803 |
| 81  | 1 | 0 | -6.716457 | -0.650438 | -6.351228 |
| 82  | 1 | 0 | -7.184605 | -2.594450 | -4.859293 |
| 83  | 1 | 0 | -6.116875 | -2.743986 | -2.634154 |
| 84  | 6 | 0 | -4.857429 | -4.131314 | 1.296568  |
| 85  | 6 | 0 | -4.235383 | -3.184368 | 0.474806  |
| 86  | 1 | 0 | -6.995447 | -1.451721 | -0.529554 |
| 87  | 1 | 0 | -8.099088 | -3.156771 | 0.887391  |
| 88  | 1 | 0 | -6.733602 | -4.875408 | 2.076150  |
| 89  | 1 | 0 | -4.250497 | -4.870032 | 1.826639  |
| 90  | 1 | 0 | -3.149386 | -3.175424 | 0.372999  |
| 91  | 6 | 0 | 4.469310  | -4.133515 | -1.452075 |
| 92  | 6 | 0 | 3.848847  | -3.207272 | -0.604991 |
| 93  | 1 | 0 | 6.623236  | -1.921010 | 0.905206  |
| 94  | 1 | 0 | 7.716029  | -3.600903 | -0.551431 |
| 95  | 1 | 0 | 6.341625  | -5.015432 | -2.083853 |
| 96  | 1 | 0 | 3.861230  | -4.741445 | -2.127049 |
| 97  | 1 | 0 | 2.764439  | -3.091218 | -0.619278 |
| 98  | 6 | 0 | 5.523709  | -2.724352 | 4.709897  |
| 99  | 6 | 0 | 5.049474  | -2.568065 | 3.403749  |
| 100 | 1 | 0 | 4.043869  | 0.684414  | 3.577069  |
| 101 | 1 | 0 | 4.904730  | 0.413763  | 5.891903  |
| 102 | 1 | 0 | 5.849698  | -1.776309 | 6.627659  |
| 103 | 1 | 0 | 5.932370  | -3.687871 | 5.025310  |
| 104 | 1 | 0 | 5.094804  | -3.413178 | 2.714669  |
| 105 | 6 | 0 | 7.478271  | 2.064059  | -2.954992 |
| 106 | 6 | 0 | 6.377320  | 2.256849  | -2.112531 |
| 107 | 1 | 0 | 5.214894  | -0.947030 | -2.018704 |
| 108 | 1 | 0 | 7.148288  | -1.282351 | -3.517595 |

|     |   |   |           |           |           |
|-----|---|---|-----------|-----------|-----------|
| 109 | 1 | 0 | 8.618360  | 0.646363  | -4.126377 |
| 110 | 1 | 0 | 8.113438  | 2.914617  | -3.216703 |
| 111 | 1 | 0 | 6.164987  | 3.259254  | -1.738229 |
| 112 | 6 | 0 | 3.096789  | 5.347440  | -0.413953 |
| 113 | 6 | 0 | 3.113680  | 3.985674  | -0.737848 |
| 114 | 1 | 0 | 5.809872  | 3.031495  | 1.122665  |
| 115 | 1 | 0 | 5.775620  | 5.433402  | 1.693332  |
| 116 | 1 | 0 | 4.039757  | 6.936094  | 0.711987  |
| 117 | 1 | 0 | 2.326502  | 5.994761  | -0.840688 |
| 118 | 1 | 0 | 2.351273  | 3.578540  | -1.403031 |
| 119 | 1 | 0 | 2.778198  | -4.410284 | 2.195627  |
| 120 | 1 | 0 | 1.465424  | -4.552650 | 1.006334  |
| 121 | 1 | 0 | 1.137979  | -4.834916 | 2.733247  |
| 122 | 1 | 0 | -2.751566 | 3.118873  | 3.722314  |
| 123 | 1 | 0 | -2.718163 | 4.412472  | 2.498397  |
| 124 | 1 | 0 | -1.342734 | 4.194004  | 3.602036  |
| 125 | 1 | 0 | -1.065263 | 4.172967  | -0.038340 |
| 126 | 1 | 0 | 0.237275  | 2.966089  | -0.178693 |
| 127 | 1 | 0 | 0.377753  | 4.289668  | 1.006791  |
| 128 | 1 | 0 | 0.734447  | 0.920591  | 2.306524  |
| 129 | 1 | 0 | -0.368560 | 1.054509  | 3.693607  |
| 130 | 1 | 0 | 0.766127  | 2.374230  | 3.329000  |
| 131 | 1 | 0 | 1.305962  | -0.930840 | 4.333563  |
| 132 | 1 | 0 | 2.426431  | -2.299176 | 4.535472  |
| 133 | 1 | 0 | 0.674580  | -2.559897 | 4.679395  |
| 134 | 1 | 0 | 4.448752  | 1.607816  | -4.301144 |
| 135 | 1 | 0 | 3.634210  | 3.068901  | -3.692953 |
| 136 | 1 | 0 | 2.987829  | 2.218242  | -5.112605 |
| 137 | 1 | 0 | 0.593256  | 2.833158  | -2.918709 |
| 138 | 1 | 0 | -0.169426 | 1.244989  | -2.696868 |
| 139 | 1 | 0 | 0.291485  | 1.794070  | -4.333484 |
| 140 | 1 | 0 | 1.619720  | -1.415160 | -3.304594 |
| 141 | 1 | 0 | 3.296079  | -1.167100 | -3.842980 |
| 142 | 1 | 0 | 1.940769  | -0.704074 | -4.904071 |
| 143 | 1 | 0 | -0.561452 | -3.911058 | -0.927663 |
| 144 | 1 | 0 | 0.403992  | -2.482140 | -1.361945 |
| 145 | 1 | 0 | 0.179524  | -3.803516 | -2.541547 |
| 146 | 1 | 0 | -0.792662 | -0.691460 | -3.946922 |
| 147 | 1 | 0 | -2.372960 | -1.197153 | -4.582348 |
| 148 | 1 | 0 | -0.954670 | -2.256629 | -4.780834 |
| 149 | 1 | 0 | -3.883051 | -3.576134 | -3.484910 |
| 150 | 1 | 0 | -3.374198 | -4.405937 | -1.990845 |

|     |   |   |           |           |           |
|-----|---|---|-----------|-----------|-----------|
| 151 | 1 | 0 | -2.423705 | -4.583332 | -3.482704 |
| 152 | 1 | 0 | -0.880329 | -2.481747 | 0.916691  |
| 153 | 1 | 0 | -1.002392 | -1.251011 | 2.196737  |
| 154 | 1 | 0 | -1.112294 | -2.974384 | 2.608788  |

### Summary of Natural Population Analysis: Natural Population of 5

| Atom | No | Natural Charge | Core     | Valence  | Rydberg | Total    |
|------|----|----------------|----------|----------|---------|----------|
| C    | 1  | -1.36406       | 1.99884  | 5.35276  | 0.01246 | 7.36406  |
| P    | 2  | 1.82128        | 9.99701  | 3.09806  | 0.08365 | 13.17872 |
| N    | 3  | -1.60082       | 1.99949  | 6.59391  | 0.00742 | 8.60082  |
| Zn   | 4  | 0.67990        | 17.99743 | 11.31817 | 0.00450 | 29.32010 |
| N    | 5  | -1.59740       | 1.99948  | 6.59085  | 0.00707 | 8.59740  |
| P    | 6  | 1.84518        | 9.99702  | 3.07472  | 0.08309 | 13.15482 |
| H    | 7  | 0.27230        | 0.00000  | 0.72500  | 0.00270 | 0.72770  |
| C    | 8  | -0.37667       | 1.99881  | 4.34834  | 0.02952 | 6.37667  |
| Zn   | 9  | 0.71818        | 17.99744 | 11.28024 | 0.00414 | 29.28182 |
| C    | 10 | -0.38613       | 1.99880  | 4.35887  | 0.02846 | 6.38613  |
| Si   | 11 | 1.89660        | 9.99763  | 2.05774  | 0.04804 | 12.10340 |
| C    | 12 | -0.36895       | 1.99881  | 4.34153  | 0.02861 | 6.36895  |
| N    | 13 | -1.60422       | 1.99948  | 6.59742  | 0.00731 | 8.60422  |
| P    | 14 | 1.83031        | 9.99701  | 3.08943  | 0.08325 | 13.16969 |
| C    | 15 | -1.37901       | 1.99885  | 5.36737  | 0.01279 | 7.37901  |
| P    | 16 | 1.82313        | 9.99700  | 3.09682  | 0.08304 | 13.17687 |
| N    | 17 | -1.59715       | 1.99949  | 6.59037  | 0.00729 | 8.59715  |
| C    | 18 | -0.36599       | 1.99883  | 4.34056  | 0.02661 | 6.36599  |
| H    | 19 | 0.28484        | 0.00000  | 0.71251  | 0.00265 | 0.71516  |
| C    | 20 | -0.36783       | 1.99884  | 4.34425  | 0.02474 | 6.36783  |
| C    | 21 | -0.38075       | 1.99880  | 4.35256  | 0.02939 | 6.38075  |
| C    | 22 | -0.36814       | 1.99882  | 4.34365  | 0.02568 | 6.36814  |
| Si   | 23 | 1.88565        | 9.99766  | 2.06780  | 0.04888 | 12.11435 |
| Si   | 24 | 1.89009        | 9.99766  | 2.06376  | 0.04849 | 12.10991 |
| C    | 25 | -0.37874       | 1.99881  | 4.35090  | 0.02904 | 6.37874  |
| Si   | 26 | 1.88641        | 9.99765  | 2.06832  | 0.04762 | 12.11359 |
| C    | 27 | -0.19887       | 1.99889  | 4.18259  | 0.01739 | 6.19887  |
| C    | 28 | -0.21927       | 1.99892  | 4.20478  | 0.01557 | 6.21927  |
| C    | 29 | -0.20991       | 1.99893  | 4.19584  | 0.01514 | 6.20991  |
| C    | 30 | -0.19711       | 1.99887  | 4.18050  | 0.01774 | 6.19711  |
| C    | 31 | -0.21657       | 1.99892  | 4.20207  | 0.01558 | 6.21657  |
| C    | 32 | -0.21021       | 1.99893  | 4.19615  | 0.01513 | 6.21021  |

|   |    |          |         |         |         |         |
|---|----|----------|---------|---------|---------|---------|
| C | 33 | -0.20899 | 1.99888 | 4.19287 | 0.01724 | 6.20899 |
| C | 34 | -0.21966 | 1.99891 | 4.20506 | 0.01569 | 6.21966 |
| C | 35 | -0.21099 | 1.99893 | 4.19687 | 0.01519 | 6.21099 |
| C | 36 | -1.16084 | 1.99913 | 5.14800 | 0.01372 | 7.16084 |
| C | 37 | -1.16039 | 1.99913 | 5.14828 | 0.01297 | 7.16039 |
| C | 38 | -1.16084 | 1.99910 | 5.14782 | 0.01392 | 7.16084 |
| C | 39 | -1.16131 | 1.99913 | 5.14866 | 0.01352 | 7.16131 |
| C | 40 | -1.16156 | 1.99910 | 5.14864 | 0.01381 | 7.16156 |
| C | 41 | -1.15893 | 1.99912 | 5.14625 | 0.01356 | 7.15893 |
| C | 42 | -0.20548 | 1.99889 | 4.19008 | 0.01652 | 6.20548 |
| C | 43 | -0.21844 | 1.99892 | 4.20384 | 0.01568 | 6.21844 |
| C | 44 | -0.21299 | 1.99893 | 4.19891 | 0.01515 | 6.21299 |
| C | 45 | -0.19842 | 1.99888 | 4.18159 | 0.01794 | 6.19842 |
| C | 46 | -0.21757 | 1.99891 | 4.20307 | 0.01558 | 6.21757 |
| C | 47 | -0.21547 | 1.99893 | 4.20135 | 0.01519 | 6.21547 |
| C | 48 | -1.16022 | 1.99913 | 5.14780 | 0.01329 | 7.16022 |
| C | 49 | -1.15777 | 1.99913 | 5.14528 | 0.01336 | 7.15777 |
| C | 50 | -1.15959 | 1.99911 | 5.14674 | 0.01374 | 7.15959 |
| C | 51 | -0.19654 | 1.99889 | 4.18002 | 0.01762 | 6.19654 |
| C | 52 | -0.21859 | 1.99892 | 4.20417 | 0.01551 | 6.21859 |
| C | 53 | -0.20722 | 1.99893 | 4.19311 | 0.01518 | 6.20722 |
| C | 54 | -0.19727 | 1.99889 | 4.18060 | 0.01778 | 6.19727 |
| C | 55 | -0.21535 | 1.99892 | 4.20096 | 0.01547 | 6.21535 |
| C | 56 | -0.20890 | 1.99893 | 4.19486 | 0.01511 | 6.20890 |
| C | 57 | -0.20448 | 1.99888 | 4.18846 | 0.01713 | 6.20448 |
| C | 58 | -0.22222 | 1.99892 | 4.20740 | 0.01590 | 6.22222 |
| C | 59 | -0.21649 | 1.99893 | 4.20235 | 0.01521 | 6.21649 |
| C | 60 | -1.16352 | 1.99914 | 5.15140 | 0.01298 | 7.16352 |
| C | 61 | -1.15922 | 1.99912 | 5.14600 | 0.01409 | 7.15922 |
| C | 62 | -1.16102 | 1.99913 | 5.14731 | 0.01458 | 7.16102 |
| C | 63 | -0.21833 | 1.99891 | 4.20374 | 0.01568 | 6.21833 |
| C | 64 | -0.20436 | 1.99888 | 4.18804 | 0.01744 | 6.20436 |
| H | 65 | 0.23052  | 0.00000 | 0.76565 | 0.00384 | 0.76948 |
| H | 66 | 0.22435  | 0.00000 | 0.77293 | 0.00272 | 0.77565 |
| H | 67 | 0.22237  | 0.00000 | 0.77495 | 0.00268 | 0.77763 |
| H | 68 | 0.22295  | 0.00000 | 0.77430 | 0.00275 | 0.77705 |
| H | 69 | 0.23008  | 0.00000 | 0.76669 | 0.00323 | 0.76992 |
| C | 70 | -0.21771 | 1.99892 | 4.20326 | 0.01554 | 6.21771 |
| C | 71 | -0.20238 | 1.99887 | 4.18642 | 0.01709 | 6.20238 |
| H | 72 | 0.23832  | 0.00000 | 0.75793 | 0.00375 | 0.76168 |
| H | 73 | 0.22499  | 0.00000 | 0.77231 | 0.00270 | 0.77501 |
| H | 74 | 0.22365  | 0.00000 | 0.77367 | 0.00268 | 0.77635 |

|   |     |          |         |         |         |         |
|---|-----|----------|---------|---------|---------|---------|
| H | 75  | 0.22477  | 0.00000 | 0.77253 | 0.00270 | 0.77523 |
| H | 76  | 0.23609  | 0.00000 | 0.76081 | 0.00310 | 0.76391 |
| C | 77  | -0.21814 | 1.99891 | 4.20365 | 0.01558 | 6.21814 |
| C | 78  | -0.21087 | 1.99888 | 4.19463 | 0.01736 | 6.21087 |
| H | 79  | 0.24175  | 0.00000 | 0.75468 | 0.00357 | 0.75825 |
| H | 80  | 0.22582  | 0.00000 | 0.77149 | 0.00269 | 0.77418 |
| H | 81  | 0.22410  | 0.00000 | 0.77322 | 0.00268 | 0.77590 |
| H | 82  | 0.22540  | 0.00000 | 0.77191 | 0.00269 | 0.77460 |
| H | 83  | 0.23854  | 0.00000 | 0.75843 | 0.00303 | 0.76146 |
| C | 84  | -0.21451 | 1.99892 | 4.20000 | 0.01560 | 6.21451 |
| C | 85  | -0.19959 | 1.99888 | 4.18266 | 0.01806 | 6.19959 |
| H | 86  | 0.22844  | 0.00000 | 0.76842 | 0.00313 | 0.77156 |
| H | 87  | 0.22251  | 0.00000 | 0.77475 | 0.00274 | 0.77749 |
| H | 88  | 0.22230  | 0.00000 | 0.77502 | 0.00268 | 0.77770 |
| H | 89  | 0.22418  | 0.00000 | 0.77310 | 0.00272 | 0.77582 |
| H | 90  | 0.23458  | 0.00000 | 0.76126 | 0.00416 | 0.76542 |
| C | 91  | -0.21816 | 1.99891 | 4.20361 | 0.01564 | 6.21816 |
| C | 92  | -0.20283 | 1.99886 | 4.18488 | 0.01908 | 6.20283 |
| H | 93  | 0.23307  | 0.00000 | 0.76392 | 0.00301 | 0.76693 |
| H | 94  | 0.22487  | 0.00000 | 0.77241 | 0.00272 | 0.77513 |
| H | 95  | 0.22338  | 0.00000 | 0.77394 | 0.00267 | 0.77662 |
| H | 96  | 0.22614  | 0.00000 | 0.77113 | 0.00273 | 0.77386 |
| H | 97  | 0.23609  | 0.00000 | 0.75896 | 0.00495 | 0.76391 |
| C | 98  | -0.21800 | 1.99891 | 4.20346 | 0.01562 | 6.21800 |
| C | 99  | -0.20707 | 1.99889 | 4.19139 | 0.01680 | 6.20707 |
| H | 100 | 0.24321  | 0.00000 | 0.75349 | 0.00330 | 0.75679 |
| H | 101 | 0.22565  | 0.00000 | 0.77166 | 0.00270 | 0.77435 |
| H | 102 | 0.22437  | 0.00000 | 0.77295 | 0.00268 | 0.77563 |
| H | 103 | 0.22580  | 0.00000 | 0.77151 | 0.00270 | 0.77420 |
| H | 104 | 0.23555  | 0.00000 | 0.76140 | 0.00305 | 0.76445 |
| C | 105 | -0.21718 | 1.99892 | 4.20266 | 0.01560 | 6.21718 |
| C | 106 | -0.20966 | 1.99888 | 4.19394 | 0.01684 | 6.20966 |
| H | 107 | 0.23161  | 0.00000 | 0.76293 | 0.00546 | 0.76839 |
| H | 108 | 0.22522  | 0.00000 | 0.77200 | 0.00278 | 0.77478 |
| H | 109 | 0.22235  | 0.00000 | 0.77496 | 0.00269 | 0.77765 |
| H | 110 | 0.22307  | 0.00000 | 0.77420 | 0.00273 | 0.77693 |
| H | 111 | 0.23233  | 0.00000 | 0.76438 | 0.00329 | 0.76767 |
| C | 112 | -0.21489 | 1.99892 | 4.20030 | 0.01567 | 6.21489 |
| C | 113 | -0.19849 | 1.99887 | 4.18185 | 0.01776 | 6.19849 |
| H | 114 | 0.22676  | 0.00000 | 0.77049 | 0.00275 | 0.77324 |
| H | 115 | 0.22428  | 0.00000 | 0.77301 | 0.00271 | 0.77572 |
| H | 116 | 0.22380  | 0.00000 | 0.77352 | 0.00267 | 0.77620 |

|   |     |         |         |         |         |         |
|---|-----|---------|---------|---------|---------|---------|
| H | 117 | 0.22671 | 0.00000 | 0.77061 | 0.00268 | 0.77329 |
| H | 118 | 0.23005 | 0.00000 | 0.76613 | 0.00382 | 0.76995 |
| H | 119 | 0.23319 | 0.00000 | 0.76482 | 0.00199 | 0.76681 |
| H | 120 | 0.23549 | 0.00000 | 0.76259 | 0.00192 | 0.76451 |
| H | 121 | 0.23578 | 0.00000 | 0.76224 | 0.00198 | 0.76422 |
| H | 122 | 0.23650 | 0.00000 | 0.76154 | 0.00196 | 0.76350 |
| H | 123 | 0.24016 | 0.00000 | 0.75727 | 0.00257 | 0.75984 |
| H | 124 | 0.23893 | 0.00000 | 0.75907 | 0.00200 | 0.76107 |
| H | 125 | 0.23503 | 0.00000 | 0.76288 | 0.00209 | 0.76497 |
| H | 126 | 0.23534 | 0.00000 | 0.76096 | 0.00369 | 0.76466 |
| H | 127 | 0.23752 | 0.00000 | 0.76054 | 0.00194 | 0.76248 |
| H | 128 | 0.23430 | 0.00000 | 0.76146 | 0.00424 | 0.76570 |
| H | 129 | 0.23199 | 0.00000 | 0.76607 | 0.00194 | 0.76801 |
| H | 130 | 0.23917 | 0.00000 | 0.75887 | 0.00196 | 0.76083 |
| H | 131 | 0.23962 | 0.00000 | 0.75838 | 0.00200 | 0.76038 |
| H | 132 | 0.23686 | 0.00000 | 0.76015 | 0.00299 | 0.76314 |
| H | 133 | 0.23394 | 0.00000 | 0.76407 | 0.00199 | 0.76606 |
| H | 134 | 0.24336 | 0.00000 | 0.75403 | 0.00261 | 0.75664 |
| H | 135 | 0.23686 | 0.00000 | 0.76118 | 0.00196 | 0.76314 |
| H | 136 | 0.23899 | 0.00000 | 0.75905 | 0.00196 | 0.76101 |
| H | 137 | 0.23433 | 0.00000 | 0.76377 | 0.00191 | 0.76567 |
| H | 138 | 0.23277 | 0.00000 | 0.76387 | 0.00336 | 0.76723 |
| H | 139 | 0.23756 | 0.00000 | 0.76058 | 0.00185 | 0.76244 |
| H | 140 | 0.23458 | 0.00000 | 0.76272 | 0.00270 | 0.76542 |
| H | 141 | 0.23834 | 0.00000 | 0.75952 | 0.00215 | 0.76166 |
| H | 142 | 0.23764 | 0.00000 | 0.76053 | 0.00182 | 0.76236 |
| H | 143 | 0.23724 | 0.00000 | 0.76070 | 0.00206 | 0.76276 |
| H | 144 | 0.22748 | 0.00000 | 0.76910 | 0.00342 | 0.77252 |
| H | 145 | 0.24011 | 0.00000 | 0.75801 | 0.00188 | 0.75989 |
| H | 146 | 0.23586 | 0.00000 | 0.76111 | 0.00303 | 0.76414 |
| H | 147 | 0.23960 | 0.00000 | 0.75820 | 0.00220 | 0.76040 |
| H | 148 | 0.23539 | 0.00000 | 0.76273 | 0.00187 | 0.76461 |
| H | 149 | 0.23676 | 0.00000 | 0.76103 | 0.00221 | 0.76324 |
| H | 150 | 0.23853 | 0.00000 | 0.75958 | 0.00189 | 0.76147 |
| H | 151 | 0.23899 | 0.00000 | 0.75901 | 0.00200 | 0.76101 |
| H | 152 | 0.23217 | 0.00000 | 0.76416 | 0.00367 | 0.76783 |
| H | 153 | 0.23622 | 0.00000 | 0.75993 | 0.00385 | 0.76378 |
| H | 154 | 0.23973 | 0.00000 | 0.75808 | 0.00220 | 0.76027 |

---

\* Total \* 0.00000 247.90530 404.25553 1.83917 654.00000



## Natural Population

---

|                       |                              |
|-----------------------|------------------------------|
| Core                  | 247.90530 ( 99.9618% of 248) |
| Valence               | 404.25553 ( 99.5703% of 406) |
| Natural Minimal Basis | 652.16083 ( 99.7188% of 654) |
| Natural Rydberg Basis | 1.83917 ( 0.2812% of 654)    |

---
